# Supplementary material for: Enantioselective heterocyclic synthesis of spiro chromanone–thiochroman complexes catalyzed by a bifunctional indane catalyst
Source: Royal Society of Chemistry journal article supplement (doi:10.1039/c0cc03489d), 2010-01-01
Supplement: c0cc03489d.pdf [file c0cc03489d.pdf]

## Enantioselective Heterocyclic Synthesis of Spiro Chromanone-Thiochroman Complexes Catalyzed by a Bifunctional Indene Catalyst

Yaojun Gao, Qiao Ren, Hao Wu, Maoguo Li, and Jian Wang\*

Department of Chemistry, National University of Singapore

3 Science Drive 3, Singapore 117543

Email: [chmwangj@nus.edu.sg](mailto:chmwangj@nus.edu.sg)

### Supporting Information

#### Contents:

|                                                                          |     |
|--------------------------------------------------------------------------|-----|
| 1. General Information                                                   | S2  |
| 2. Preparation of Catalysts                                              | S3  |
| 3. Representative Procedure                                              | S17 |
| 4. Analytical Data                                                       | S17 |
| 5. Oxidation of Compound <b>8a</b>                                       | S34 |
| 6. Preparation of Compound <b>12</b> for X-ray Crystallographic Analysis | S35 |
| 7. Preparation of Compound <b>11</b>                                     | S36 |
| 8. HPLC Profile and NMR Spectra                                          | S38 |

## 1. General Information

Chemicals and solvents were purchased from commercial suppliers and used as received.  $^1\text{H}$  and  $^{13}\text{C}$  NMR spectra were recorded on a Bruker ACF300 (300 MHz) or AMX500 (500 MHz) spectrometer. Chemical shifts were reported in parts per million (ppm), and the residual solvent peak was used as an internal reference: proton (chloroform  $\delta$  7.26), carbon (chloroform  $\delta$  77.0) or tetramethylsilane (TMS  $\delta$  0.00) was used as a reference. Multiplicity was indicated as follows: s (singlet), d (doublet), t (triplet), q (quartet), m (multiplet), dd (doublet of doublet), bs (broad singlet). Coupling constants were reported in Hertz (Hz). Low resolution mass spectra were obtained on a Finnigan/MAT LCQ spectrometer in ESI mode, and a Finnigan/MAT 95XL-T mass spectrometer in EI mode. All high resolution mass spectra were obtained on a Finnigan/MAT 95XL-T spectrometer. For thin layer chromatography (TLC), Merck pre-coated TLC plates (Merck 60 F254) were used, and compounds were visualized with a UV light at 254 nm. Further visualization was achieved by staining with iodine, or ninhydrin followed by heating using a heat gun. Flash chromatography separations were performed on Merck 60 (0.040-0.063 mm) mesh silica gel. The enantiomeric excesses of products were determined by chiral phase HPLC analysis. Optical rotations were recorded on Jasco DIP-1000 polarimeter.

## 2. Preparation of the Catalysts

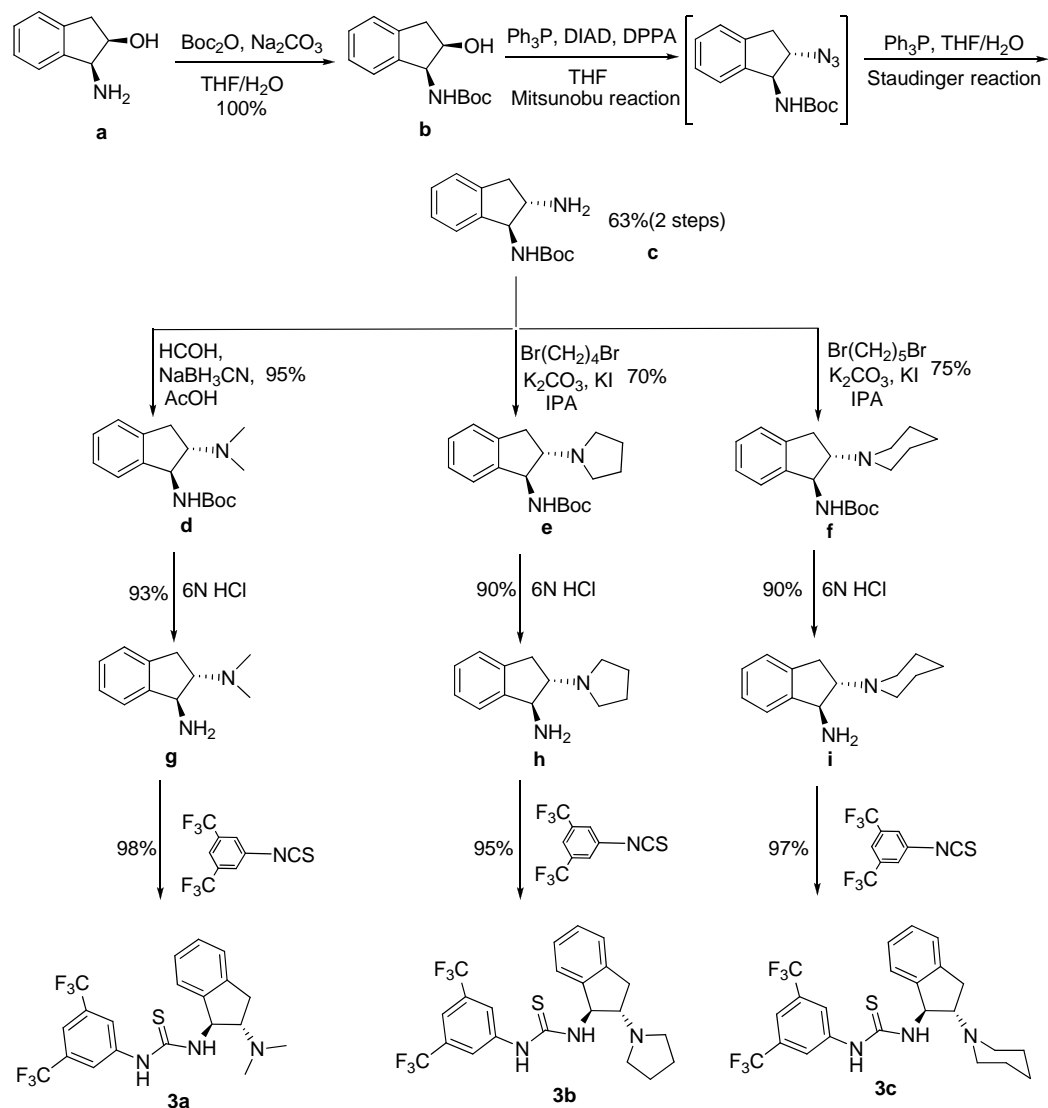

Scheme 1, Synthetic route for catalyst 3a, 3b, and 3c

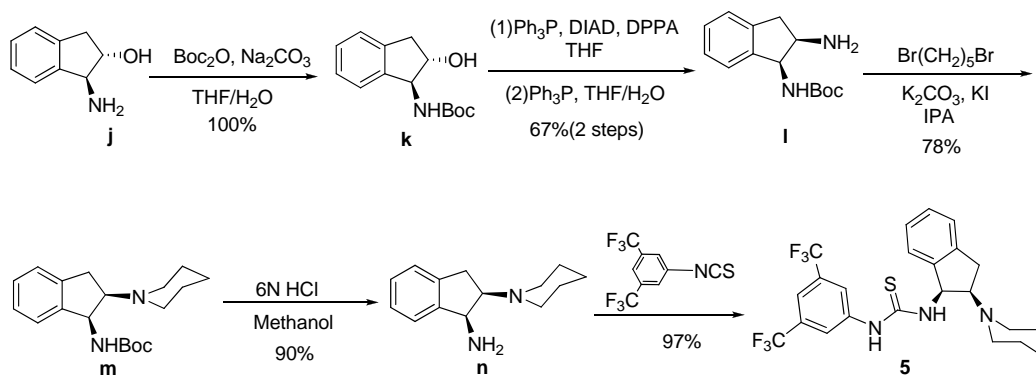

Scheme 2, Synthetic route for catalyst 5

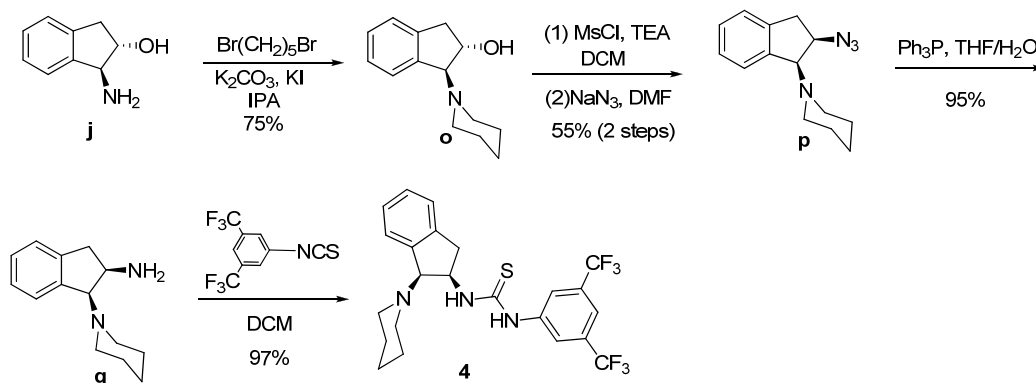

Scheme 3, Synthetic route for catalyst 4

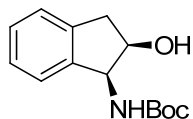

**tert-butyl (1S,2R)-2-hydroxy-2,3-dihydro-1H-inden-1-ylcarbamate (b)**<sup>1</sup>. A solution of (Boc)<sub>2</sub>O (2.4 g, 11 mmol) in THF (5 ml) was added to the mixture of the amino alcohol **a** (1.5 g, 10 mmol) and sodium carbonate (2.12 g, 20 mmol) in THF/H<sub>2</sub>O (1:1, 60 ml) at 0°C. The mixture was stirred at 0°C for 1h and then at room temperature for another two 2h (TLC was used to monitor the reaction). Water

(30 ml) was added to the mixture upon completion. The organic layer was separated and the aqueous layer was extracted with ethyl acetate (3 x 50 ml). The combined organic layers was washed with brine (60 ml) and dried with anhydrous  $\text{MgSO}_4$  for 1h. It was then filtered and the solvent was removed under vacuum to give the product (2.5 g) with quantitative yield. It was sufficiently pure for the next step. The pure product was obtained by purification with silica gel chromatography.  $^1\text{H}$  NMR (500 MHz,  $\text{CDCl}_3$ ):  $\delta$  = 7.3-7.29 (m, 1H), 7.24-7.22 (m, 3H), 5.11 (d,  $J$  = 28.7 Hz, 2H), 4.60 (s, 1H), 3.13 (dd,  $J$  = 16.6, 5.2 Hz, 1H), 2.93 (dd,  $J$  = 16.6, 1.7 Hz, 1H), 1.96 (s, 1H), 1.51 (s, 9H);  $^{13}\text{C}$  NMR (125 MHz,  $\text{CDCl}_3$ ):  $\delta$  = 156.30, 140.82, 139.82, 128.18, 127.12, 125.33, 124.47, 79.88, 73.65, 58.89, 39.41, 28.39; HRMS (ESI) calcd for  $\text{C}_{14}\text{H}_{19}\text{NO}_3$  ( $\text{M} + \text{H}^+$ ) 249.1365, found 249.1367.

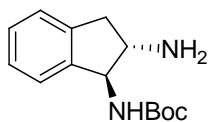

**tert-butyl (1S,2S)-2-amino-2,3-dihydro-1H-inden-1-ylcarbamate (c)**<sup>2</sup>. Diisopropyl azodicarboxylate (3.0 g, 15 mmol) was added to a stirred solution of compound **b** (2.5 g, 10 mmol) and triphenylphosphane (3.15 g, 12 mmol) in THF (50 mL) at 0 °C *via* syringe under nitrogen atmosphere. After 10 min, diphenylphosphoryl azide (DPPA) (4.1 g, 15 mmol) was added dropwise by syringe. The solution was stirred overnight at room temperature. After that, triphenylphosphane (5.3 g, 20 mmol) was added in one portion, and the solution was stirred at room temperature for 2 hours. Water (5 mL) was then added and the solution was heated at 50°C for 6 h. The reaction mixture was concentrated and the residue was purified by silica gel chromatography (eluting with 1:1 EtOAc-DCM then 1:10 methanol-DCM) to obtain the white solid product (1.57g, 63% yield, two steps).  $^1\text{H}$  NMR (300 MHz,  $\text{CDCl}_3$ ):  $\delta$  = 7.20-7.19 (d,  $J$  = 5.9 Hz, 4H), 4.85-4.63 (m, 2H), 3.42 (dd,  $J$  = 14.8, 7.5 Hz, 1H), 3.19 (dd,

$J = 15.6, 7.4$  Hz, 1H), 2.63 (dd,  $J = 15.6, 8.2$  Hz, 1H), 1.75 (s, 2H), 1.49 (s, 9H);  $^{13}\text{C}$  NMR (75 MHz,  $\text{CDCl}_3$ ):  $\delta = 156.29, 141.55, 140.60, 128.07, 126.94, 124.78, 123.80, 79.65, 64.52, 62.39, 39.25, 28.37$ ;  
HRMS (ESI) calcd for  $\text{C}_{14}\text{H}_{21}\text{N}_2\text{O}_2$  ( $\text{M} + \text{H}^+$ ) 249.1603, found 249.1601.

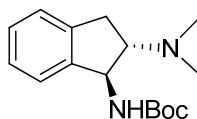

**tert-butyl (1S,2S)-2-(dimethylamino)-2,3-dihydro-1H-inden-1-ylcarbamate (d)**<sup>3</sup>. To a solution of compound **c** (0.75 g, 3 mmol) in 15 mL  $\text{CH}_3\text{CN}$  was added aqueous formaldehyde (37% w/w, 1.2 mL, 15 mmol), the solution was stirred at room temperature for 15 minutes. After that,  $\text{NaBH}_3\text{CN}$  (0.38 g, 6 mmol) was added, followed 15 minutes stirring later by AcOH (1 mL). After 1 hour, the reaction mixture was dilute with 2% methanol-DCM (40 mL), washed with 1.0 M NaOH (3 x 30), dried by  $\text{MgSO}_4$ , and concentrated. The resulting residue was purified by silica gel chromatography (eluting with 1: 20 methanol-DCM) to afford the pure product (0.79 g, 95% yield).  $^1\text{H}$  NMR (500 MHz,  $\text{CDCl}_3$ ):  $\delta = 7.26\text{-}7.15$  (m, 4H), 5.20 (t,  $J = 8.4$  Hz, 1H), 4.77 (d,  $J = 8.8$  Hz, 1H), 3.03 (m, 2H), 2.87 (dd,  $J = 14.0, 7.4$  Hz, 1H), 2.40 (s, 6H), 1.49 (s, 9H);  $^{13}\text{C}$  NMR (125 MHz,  $\text{CDCl}_3$ ):  $\delta = 155.49, 142.61, 139.71, 127.90, 126.96, 124.59, 124.13, 79.49, 74.59, 57.25, 42.94, 33.68, 28.43$ ; HRMS (ESI) calcd for  $\text{C}_{16}\text{H}_{25}\text{N}_2\text{O}_2$  ( $\text{M} + \text{H}^+$ ) 277.1916, found 277.1918.

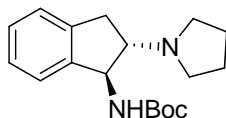

**tert-butyl (1S,2S)-2-(pyrrolidin-1-yl)-2,3-dihydro-1H-inden-1-ylcarbamate (e)**<sup>4</sup>. Compound **3c** (0.75 g, 3 mmol), 1,4-dibromobutane (0.78 g, 3.6 mmol), potassium carbonate (1.08 g, 7.8 mmol),

potassium iodide (0.1 g, 0.6 mmol) and 10 mL iso-propanol were added into a sealed tube. The mixture was heated at 80 °C for 48hrs and then allowed to cool to room temperature. The mixture was filtered and washing with DCM, the filtrate was concentrated and the resulting residue was purified by silica gel chromatography (eluting with 1:5 EtOAc- hexane then 1:10 methanol-DCM) to obtain the product **5** (0.64 g, 70% yield). <sup>1</sup>H NMR (500 MHz, CDCl<sub>3</sub>): δ = 7.26-7.16 (m, 4H), 5.25-5.22 (m, 1H), 4.81 (d, *J* = 9.1 Hz, 1H), 3.17 (dd, *J* = 18.9, 11.0 Hz, 1H), 3.01-2.98 (m, 2H), 2.80-2.75 (m, 4H), 1.85 (s, 4H), 1.49 (s, 9H); <sup>13</sup>C NMR (75 MHz, CDCl<sub>3</sub>): δ = 155.44, 142.25, 139.68, 128.06, 127.05, 124.56, 124.08, 79.61, 72.61, 59.61, 52.34, 36.24, 28.41, 23.36; HRMS (ESI) calcd for C<sub>18</sub>H<sub>27</sub>N<sub>2</sub>O<sub>2</sub> (M + H<sup>+</sup>) 303.2073, found 303.2062.

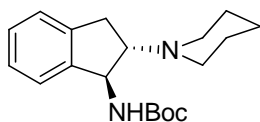

**tert-butyl (1S,2S)-2-(piperidin-1-yl)-2,3-dihydro-1H-inden-1-ylcarbamate (f)**<sup>4</sup>. Compound **c** (0.75 g, 3 mmol), 1,5-dibromopentane(0.83 g, 3.6 mmol), potassium carbonate (1.08 g, 7.8 mmol), potassium iodide (0.1 g, 0.6 mmol) and 10 mL iso-propanol were added into a sealed tube. The mixture was heated at 80 °C for 48hrs and then allowed to cool to room temperature. The mixture was filtered and washing with DCM, the filtrate was concentrated and the resulting residue was purified by silica gel chromatography (eluting with 1:10 EtOAc- hexane then 1:10 methanol-DCM) to obtain the product **5** (0.71g, 75% yield). <sup>1</sup>H NMR (500 MHz, CDCl<sub>3</sub>): δ = 7.28-7.12(m, 4H), 5.24 (dd, *J* = 13.7, 5.2 Hz, 1H), 4.89-4.87 (m, 1H), 3.05 (s, 2H), 2.87 (dd, *J* = 18.6, 11.7 Hz, 1H), 2.60 (dd, *J* = 23.2, 4.9 Hz, 4H), 1.61-1.59 (m, 4H), 1.48 (s, 11H); <sup>13</sup>C NMR (125 MHz, CDCl<sub>3</sub>): δ = 155.41, 142.52, 139.97, 127.85, 126.88, 124.50, 124.14, 79.44, 74.64, 56.53, 51.60, 33.81, 28.41, 26.13, 24.45; HRMS (ESI) calcd for C<sub>19</sub>H<sub>29</sub>N<sub>2</sub>O<sub>2</sub> (M + H<sup>+</sup>) 317.2229, found 317.2227.

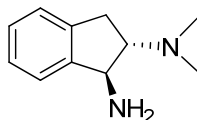

**(1S,2S)-N<sup>2</sup>,N<sup>2</sup>-dimethyl-2,3-dihydro-1H-indene-1,2-diamine (g).** To a solution of compound **d** (0.7 g, 2.5 mmol) in 3 mL methanol was added 3 mL concentrated HCl solution. The mixture was stirred at room temperature for 5hrs, then 40% NaOH solution was added until pH of mixture was 14. After extraction by DCM (5 x 10 mL), the organic layer was combined and dried by MgSO<sub>4</sub>, then concentrated. The pure product (0.41 g, 93% yield) was obtained by silica gel chromatography (very short column, eluting with 1:10 to 1:5 methanol-DCM). <sup>1</sup>H NMR (500 MHz, CDCl<sub>3</sub>): δ = 7.30 (d, *J* = 7.3 Hz, 1H), 7.23-7.16 (m, 3H), 4.23 (d, *J* = 7.3 Hz, 1H), 2.95 (dd, *J* = 13.4, 6.1 Hz, 1H), 2.89-2.80 (m, 2H), 2.40 (s, 6H), 1.81 (s, 2H); <sup>13</sup>C NMR (125 MHz, CDCl<sub>3</sub>): δ = 145.30, 139.71, 127.30, 126.68, 124.59, 123.42, 77.76, 59.07, 43.02, 31.17; HRMS (ESI) calcd for C<sub>11</sub>H<sub>17</sub>N<sub>2</sub> (M + H<sup>+</sup>) 177.1392, found 177.1391.

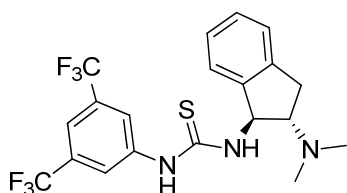

**1-(3,5-bis(trifluoromethyl)phenyl)-3-((1S,2S)-2-(dimethylamino)-2,3-dihydro-1H-inden-1-yl)thiourea (3a).** To a solution of compound **g** (0.4 g, 2.27 mmol) in 10 mL DCM was added 1-isothiocyanato-3,5-bis(trifluoromethyl)benzene (0.59 g, 2.16 mmol) dropwise. The mixture was stirred at room temperature for 30min, reaction completed. The solvent was removed by rotary evaporation and pure product **3a** (1.0g, 98% yield) was obtained by silica gel chromatography (eluting with 1:5 EtOAc- hexane then 1: 10 methanol-DCM). <sup>1</sup>H NMR (500 MHz, CDCl<sub>3</sub>): δ = 12.84 (s, 1H), 8.10 (s, 2H), 7.61 (s, 1H), 7.42-7.28 (m, 4H), 6.86 (d, *J* = 3.2 Hz, 1H), 5.22 (m, 1H), 3.75 (q, *J* = 8.5



Hz, 1H), 3.08 (ddd,  $J = 44.1, 15.9, 9.0$  Hz, 2H), 2.52 (s, 6H);  $^{13}\text{C}$  NMR (125 MHz,  $\text{CDCl}_3$ ):  $\delta = 182.25, 141.95, 139.83, 137.38, 133.15, 132.06, 131.80, 131.53, 131.26, 129.35, 127.86, 125.57, 124.18, 123.46, 122.73, 122.01, 117.60, 74.45, 62.57, 40.75, 25.39$ ; HRMS (ESI) calcd for  $\text{C}_{20}\text{H}_{20}\text{F}_6\text{N}_3\text{S}$  ( $\text{M} + \text{H}^+$ ) 448.1282, found 448.1277.

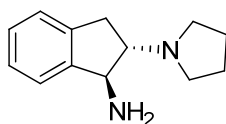

**(1S,2S)-2-(pyrrolidin-1-yl)-2,3-dihydro-1H-inden-1-amine (h).** To a solution of compound **e** (0.6 g, 2.0 mmol) in 3 mL methanol was added 3 mL concentrated HCl solution. The mixture was stirred at room temperature for 5hrs, then 40% NaOH solution was added until pH of mixture was 14. After extraction by DCM (5 x 10 mL), the organic layer was combined and dried by  $\text{MgSO}_4$ , then concentrated. The pure product (0.36 g, 90% yield) was obtained by silica gel chromatography (very short column, eluting with 1:10 to 1: 5 methanol-DCM).  $^1\text{H}$  NMR (500 MHz,  $\text{CDCl}_3$ ):  $\delta = 7.31\text{-}7.16$  (m, 4H), 4.35 (d,  $J = 7.3$  Hz, 1H), 3.10 (dd,  $J = 15.3, 7.7$  Hz, 1H), 2.94 (dd,  $J = 15.3, 9.0$  Hz, 1H), 2.86-2.81 (m, 5H), 2.41 (s, 2H), 1.86 (dd,  $J = 9.0, 3.9$  Hz, 4H);  $^{13}\text{C}$  NMR (75 MHz,  $\text{CDCl}_3$ ):  $\delta = 145.37, 139.57, 127.40, 126.78, 124.37, 123.45, 75.99, 61.21, 52.62, 35.34, 23.23$ ; HRMS (ESI) calcd for  $\text{C}_{13}\text{H}_{19}\text{N}_2$  ( $\text{M} + \text{H}^+$ ) 203.1548, found 203.1543.

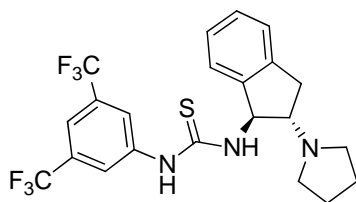

**1-(3,5-bis(trifluoromethyl)phenyl)-3-((1S,2S)-2-(pyrrolidin-1-yl)-2,3-dihydro-1H-inden-1-yl)thiou**

**rea (3b).** To a solution of compound **e** (0.36 g, 1.78 mmol) in 10 mL DCM was added 1-isothiocyanato-3,5-bis(trifluoromethyl)benzene (0.51 g, 1.87 mmol) dropwise. The mixture was stirred at room temperature for 30min, reaction completed. The solvent was removed by rotary evaporation and pure product **3b** (0.84 g, 95% yield) was obtained by silica gel chromatography (eluting with 1:5 EtOAc- hexane then 1: 10 methanol-DCM).  $^1\text{H}$  NMR (500 MHz,  $\text{CDCl}_3$ ):  $\delta$  = 12.82 (s, 1H), 8.05 (s, 2H), 7.63 (s, 1H), 7.34 (ddd,  $J$  = 37.5, 21.3, 6.6 Hz, 4H), 6.68 (s, 1H), 5.25-5.23 (m, 1H), 4.03 (q,  $J$  = 8.2 Hz, 1H), 3.11 (dd,  $J$  = 8.7, 3.6 Hz, 2H), 2.94-2.84 (m, 4H), 1.90 (s, 4H);  $^{13}\text{C}$  NMR (125 MHz,  $\text{CDCl}_3$ ):  $\delta$  = 182.77, 141.97, 140.04, 137.91, 132.10, 131.83, 131.31, 129.36, 127.95, 125.62, 124.29, 123.49, 123.42, 122.12, 117.94, 77.25, 77.00, 76.75, 70.55, 63.20, 48.55, 26.86, 23.93; HRMS (ESI) calcd for  $\text{C}_{22}\text{H}_{22}\text{F}_6\text{N}_3\text{S}$  ( $\text{M} + \text{H}^+$ ) 474.1439, found 474.1443.

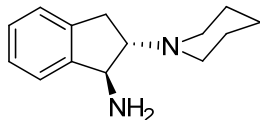

**(1S,2S)-2-(piperidin-1-yl)-2,3-dihydro-1H-inden-1-amine (i).** To a solution of compound **f** (0.7 g, 2.2 mmol) in 3 mL methanol was added 3 mL concentrated HCl solution. The mixture was stirred at room temperature for 5hrs, then 40% NaOH solution was added until pH of mixture was 14. After extraction by DCM (5 x 10 mL), the organic layer was combined and dried by  $\text{MgSO}_4$ , then concentrated. The pure product (0.43 g, 90% yield) was obtained by silica gel chromatography (very short column, eluting with 1:10 to 1: 5 methanol-DCM).  $^1\text{H}$  NMR (500 MHz,  $\text{CDCl}_3$ ):  $\delta$  = 7.22 (d,  $J$  = 7.3 Hz, 1H), 7.14-7.07 (m, 3H), 4.25 (d,  $J$  = 6.9 Hz, 1H), 2.92 (dd,  $J$  = 13.9, 6.6 Hz, 1H), 2.81 (ddd,  $J$  = 21.8, 14.7, 8.2 Hz, 2H), 2.53 (s, 4H), 2.15 (s, 2H), 1.58-1.53 (m, 4H), 1.40 (dt,  $J$  = 11.3, 5.8 Hz, 2H);  $^{13}\text{C}$  NMR (125 MHz,  $\text{CDCl}_3$ ):  $\delta$  = 145.16, 139.87, 127.20, 126.56, 124.42, 123.38, 77.71, 58.33, 51.96, 31.95,

25.96, 24.40; HRMS (ESI) calcd for  $C_{14}H_{21}N_2(M + H^+)$  217.1705, found 217.1708.

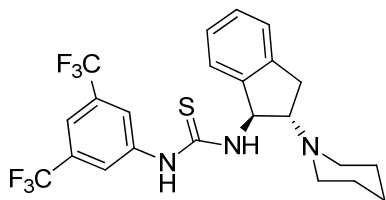

**1-(3,5-bis(trifluoromethyl)phenyl)-3-((1S,2S)-2-(piperidin-1-yl)-2,3-dihydro-1H-inden-1-yl)thiourea (3c).**

To a solution of compound **i** (0.4 g, 1.85 mmol) in 10 mL DCM was added 1-isothiocyanato-3,5-bis(trifluoromethyl)benzene (0.53 g, 1.95 mmol) dropwise. The mixture was stirred at room temperature for 30min, reaction completed. The solvent was removed by rotary evaporation and pure product **3c** (0.87 g, 97% yield) was obtained by silica gel chromatography (eluting with 1:10 EtOAc- hexane then 1: 10 methanol-DCM).  $^1H$  NMR (500 MHz,  $CDCl_3$ ):  $\delta$  = 12.20 (s, 1H), 8.06 (s, 2H), 7.70 (s, 1H), 7.43-7.26 (m, 4H), 6.72 (s, 1H), 5.31 (m, 1H), 3.72 (q,  $J$  = 8.2 Hz, 1H), 3.21 (dd,  $J$  = 16.1, 8.5 Hz, 1H), 3.01 (dd,  $J$  = 16.1, 8.8 Hz, 1H), 2.77-2.67 (m, 4H), 1.56 (dd,  $J$  = 44.8, 22.4 Hz, 7H);  $^{13}C$  NMR (125 MHz,  $CDCl_3$ ):  $\delta$  = 183.44, 141.53, 140.37, 137.76, 132.13, 131.85, 131.58, 131.31, 129.41, 127.85, 125.78, 125.58, 124.25, 123.61, 122.07, 118.82, 75.27, 62.04, 50.65, 26.33, 25.94, 23.84; HRMS (ESI) calcd for  $C_{23}H_{24}F_6N_3S(M + H^+)$  488.1595, found 488.1598.

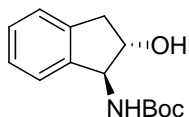

**tert-butyl (1S,2S)-2-hydroxy-2,3-dihydro-1H-inden-1-ylcarbamate (k)**<sup>1</sup>. It was prepared by using the same procedure for synthesis of compound **b**. Quantitative yield.  $^1H$  NMR (300 MHz,  $CDCl_3$ ):  $\delta$  = 7.18-7.11 (m, 4H), 5.00 (s, 1H), 4.82 (t,  $J$  = 5.9 Hz, 1H), 4.35-4.28 (m, 1H), 3.19 (dd,  $J$  = 15.8, 7.7 Hz, 1H), 2.81 (dd,  $J$  = 15.8, 8.1 Hz, 1H), 1.41 (s, 9H);  $^{13}C$  NMR (75 MHz,  $CDCl_3$ ):  $\delta$  = 157.35, 140.12, 139.34, 128.40, 127.09, 125.09, 123.05, 81.82, 80.40, 63.98, 38.31, 28.31; HRMS (ESI) calcd for

$C_{14}H_{19}NO_3$  ( $M + H^+$ ) 249.1365, found 249.1366.

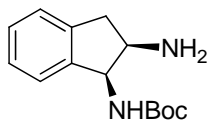

**tert-butyl (1S,2R)-2-amino-2,3-dihydro-1H-inden-1-ylcarbamate (1)**<sup>2</sup>. It was prepared by using the same procedure for synthesis of compound **c** (67% yield, two steps). <sup>1</sup>H NMR (500 MHz, CDCl<sub>3</sub>):  $\delta$  = 7.29 (m, 1H), 7.21 (d,  $J$  = 2.2 Hz, 3H), 5.23 (s, 1H), 5.03 (s, 1H), 3.82 (s, 1H), 3.12 (dd,  $J$  = 15.9, 6.1 Hz, 1H), 2.69 (dd,  $J$  = 15.9, 3.3 Hz, 1H), 1.73 (s, 2H), 1.49 (s, 9H); <sup>13</sup>C NMR (125 MHz, CDCl<sub>3</sub>):  $\delta$  = 156.05, 141.43, 140.60, 128.00, 126.94, 125.20, 124.71, 79.53, 58.56, 54.70, 39.70, 28.38; HRMS (ESI) calcd for  $C_{14}H_{21}N_2O_2$  ( $M + H^+$ ) 249.1603, found 249.1606.

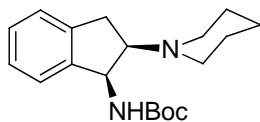

**tert-butyl (1S,2R)-2-(piperidin-1-yl)-2,3-dihydro-1H-inden-1-ylcarbamate (m)**<sup>4</sup>. It was prepared by using the same procedure for synthesis of compound **f** (75% yield). <sup>1</sup>H NMR (300 MHz, CDCl<sub>3</sub>):  $\delta$  = 7.58 (s, 1H), 7.21-7.14 (m, 3H), 5.81 (d,  $J$  = 5.3 Hz, 1H), 4.90 (s, 1H), 3.02 (p,  $J$  = 7.4 Hz, 1H), 2.92-2.89 (m, 2H), 2.42 (dd,  $J$  = 11.7, 6.2 Hz, 4H), 1.58 (dt,  $J$  = 12.0, 6.1 Hz, 6H), 1.46 (s, 9H); <sup>13</sup>C NMR (75 MHz, CDCl<sub>3</sub>):  $\delta$  = 156.03, 143.35, 140.42, 127.83, 126.62, 125.95, 124.17, 78.75, 67.58, 54.81, 52.40, 34.51, 28.34, 25.76, 24.26; HRMS (ESI) calcd for  $C_{19}H_{29}N_2O_2$  ( $M + H^+$ ) 317.2229, found 317.2225.

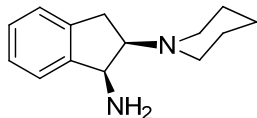

**(1*S*,2*R*)-2-(piperidin-1-yl)-2,3-dihydro-1*H*-inden-1-amine (n).** It was prepared by using the same procedure for synthesis of compound **i** (90% yield). <sup>1</sup>H NMR (500 MHz, CDCl<sub>3</sub>): δ = 7.30 (d, *J* = 6.3 Hz, 1H), 7.14-7.08 (m, 3H), 4.15 (d, *J* = 5.4 Hz, 1H), 2.80 (qd, *J* = 14.8, 8.5 Hz, 2H), 2.72-2.68 (m, 1H), 2.48 (s, 2H), 2.38 (d, *J* = 3.8 Hz, 2H), 2.30 (s, 2H), 1.56 (dt, *J* = 11.0, 5.7 Hz, 4H), 1.42-1.40 (m, 2H); <sup>13</sup>C NMR (125 MHz, CDCl<sub>3</sub>): δ = 144.85, 140.48, 127.51, 126.39, 124.44, 124.35, 69.87, 55.40, 52.58, 33.51, 25.53, 24.04; HRMS (ESI) calcd for C<sub>14</sub>H<sub>21</sub>N<sub>2</sub> (M + H<sup>+</sup>) 217.1705, found 217.17010.

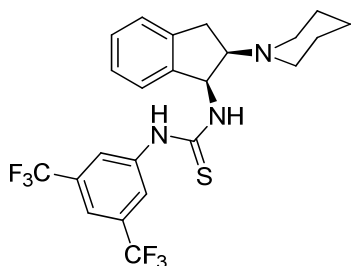

**1-(3,5-bis(trifluoromethyl)phenyl)-3-((1*S*,2*R*)-2-(piperidin-1-yl)-2,3-dihydro-1*H*-inden-1-yl)thiourea (5).** It was prepared by using the same procedure for synthesis of catalyst **3c** (97% yield). <sup>1</sup>H NMR (500 MHz, CDCl<sub>3</sub>): δ = 8.38 (s, 1H), 7.78 (d, *J* = 51.1 Hz, 3H), 7.60 (s, 1H), 7.15-7.05 (m, 3H), 5.53 (s, 1H), 3.06 (d, *J* = 6.6 Hz, 1H), 2.89 (dd, *J* = 15.4 Hz, 6.9, 1H), 2.79-2.74 (m, 1H), 2.31 (s, 4H), 1.25 (s, 6H); <sup>13</sup>C NMR (125 MHz, CDCl<sub>3</sub>): δ = 180.13, 141.42, 140.74, 139.08, 133.36, 133.08, 132.81, 132.55, 128.71, 126.97, 126.83, 126.05, 124.47, 123.88, 123.71, 121.71, 119.54, 118.85, 68.02, 58.90, 52.26, 34.34, 25.63, 23.88; HRMS (ESI) calcd for C<sub>23</sub>H<sub>24</sub>F<sub>6</sub>N<sub>3</sub>S (M + H<sup>+</sup>) 488.1595, found 488.1590.

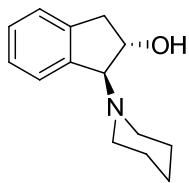

**(1S,2S)-1-(piperidin-1-yl)-2,3-dihydro-1H-inden-2-ol (o)**<sup>4</sup>. Compound **j** (0.75 g, 5 mmol), 1,5-dibromopentane (1.38 g, 6.0 mmol), potassium carbonate (1.80 g, 13 mmol), potassium iodide (0.17 g, 1.0 mmol) and 10 mL iso-propanol were added into a sealed tube. The mixture was heated at 80 °C for 48hrs and then allowed to cool to room temperature. The mixture was filtered and washing with DCM, the filtrate was concentrated and the resulting residue was purified by silica gel chromatography (eluting with 1:5 EtOAc- hexane then 1:10 methanol-DCM) to obtain the product **o** (0.82 g, 75% yield). <sup>1</sup>H NMR (300 MHz, CDCl<sub>3</sub>): δ = 7.36-7.33 (m, 1H), 7.12-7.16 (m, 3H), 4.66 (dd, *J* = 12.3, 5.3 Hz, 1H), 4.08 (d, *J* = 4.8 Hz, 1H), 3.25 (dd, *J* = 16.2, 7.1 Hz, 1H), 2.80 (dd, *J* = 16.2, 5.5 Hz, 1H), 2.62-2.61 (m, 4H), 1.58-1.54 (m, 4H), 1.46 (d, *J* = 5.3 Hz, 2H); <sup>13</sup>C NMR (75 MHz, CDCl<sub>3</sub>): δ = 140.62, 140.33, 127.66, 126.41, 125.82, 124.90, 78.49, 73.54, 50.79, 40.06, 26.51, 24.66; HRMS (ESI) calcd for C<sub>14</sub>H<sub>20</sub>NO (*M* + *H*<sup>+</sup>) 218.1545, found 218.1545.

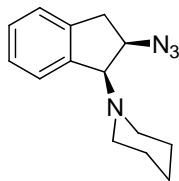

**1-((1S,2R)-2-azido-2,3-dihydro-1H-inden-1-yl)piperidine (p)**<sup>5</sup>. To a stirred solution of compound **o** (0.78 g, 3.6 mmol) and triethylamine (1.1 g, 10.8 mmol) in dry DCM (10 mL) at 0°C under nitrogen was added dropwise methanesulfonyl chloride (0.62 g, 5.4 mmol). The mixture was stirred for another 20 min at room temperature, and the solvent was evaporated under reduced pressure. The residue was extracted with DCM, washed successively with water, and brine, and dried over MgSO<sub>4</sub>. The organic

layer was concentrated to afford crude mesylate intermediate. Then the crude mesylate intermediate was redissolved in DMF (10 mL), followed by adding NaN<sub>3</sub> (1.87 g, 28.8 mmol). The mixture was heated under nitrogen at 70°C for 6 hrs. After the mixture was cooled, the solvent was evaporated under reduced pressure and the residue was extracted with EtOAc (25 mL x 3) and dried over MgSO<sub>4</sub>. The organic layer was removed under reduced pressure, and the crude product was purified by silica gel chromatography (eluting with 1:10 EtOAc- hexane) to afford product **p** (0.48 g, 55% yield, two step). <sup>1</sup>H NMR (500 MHz, CDCl<sub>3</sub>): δ = 7.26-7.10 (m, 4H), 4.63 (d, *J* = 6.9 Hz, 1H), 3.17 (td, *J* = 8.0 Hz, 6.8, 1H), 3.03 (dd, *J* = 15.8, 7.9 Hz, 1H), 2.81 (dd, *J* = 15.8, 7.9 Hz, 1H), 2.48 (ddt, *J* = 38.5, 10.7, 5.2 Hz, 4H), 1.53 (dt, *J* = 11.3, 5.7 Hz, 4H), 1.39 (dd, *J* = 11.7, 6.0 Hz, 2H); <sup>13</sup>C NMR (125 MHz, CDCl<sub>3</sub>): δ = 140.43, 139.14, 128.56, 126.94, 124.71, 124.15, 72.82, 66.85, 51.91, 33.83, 25.94, 24.30; HRMS (ESI) calcd for C<sub>14</sub>H<sub>19</sub>N<sub>4</sub> (M + H<sup>+</sup>) 243.1610, found 243.1612.

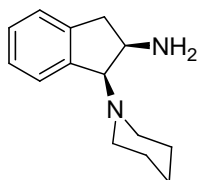

**(1S,2R)-1-(piperidin-1-yl)-2,3-dihydro-1H-inden-2-amine (q)**<sup>5</sup>. To a solution of compound **p** (0.46 g, 1.9 mmol) in 10 mL THF was added triphenylphosphane (1.5 g, 5.7 mmol). The mixture was stirred at room temperature for 3h, then added 3 mL water, heated at 60°C for 4 hrs. The solvent was removed by reduced pressure, and the resulting residue was purified by a very short silica gel column (eluting with 1:10 to 1: 5 methanol-DCM) to afford compound **q** (0.39g, 95% yield). <sup>1</sup>H NMR (500 MHz, CDCl<sub>3</sub>): δ = 7.27 (t, *J* = 5.8 Hz, 1H), 7.19-7.11 (m, 3H), 4.31 (d, *J* = 6.9 Hz, 1H), 2.99-2.83 (m, 3H), 2.60-2.58(m, 4H), 2.45 (s, 2H), 1.64-1.59 (m, 4H), 1.45 (dt, *J* = 11.7, 5.8 Hz, 2H); <sup>13</sup>C NMR (125 MHz, CDCl<sub>3</sub>): δ = 144.92, 139.73, 127.18, 126.54, 124.36, 123.34, 77.45, 58.16, 51.84, 31.67, 25.82, 24.29; HRMS (ESI)

calcd for  $C_{14}H_{21}N_2$  ( $M + H^+$ ) 217.1705, found 217.1708.

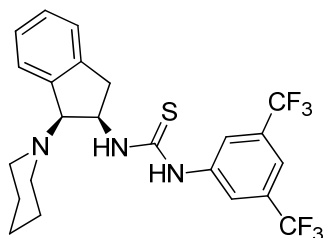

**1-(3,5-bis(trifluoromethyl)phenyl)-3-((1S,2R)-1-(piperidin-1-yl)-2,3-dihydro-1H-inden-2-yl)thiourea**

**ea (4).** To a solution of compound **q** (0.39 g, 1.81 mmol) in 10 mL DCM was added 1-isothiocyanato-3,5-bis(trifluoromethyl)benzene (0.52 g, 1.90 mmol) dropwise. The mixture was stirred at room temperature for 30min, reaction completed. The solvent was removed by rotary evaporation and pure product **4** (0.90 g, 97% yield) was obtained by silica gel chromatography (eluting with 1:10 EtOAc- hexane then 1: 10 methanol-DCM).  $^1H$  NMR (300 MHz,  $CDCl_3$ ):  $\delta$  = 12.14 (s, 1H), 7.98 (s, 2H), 7.61 (s, 1H), 7.27 (ddd,  $J$  = 20.9, 12.6, 4.3 Hz, 4H), 6.68 (s, 1H), 5.22 (m, 1H), 3.63 (dd,  $J$  = 6.2, 8.3 Hz, 1H), 3.13 (dd,  $J$  = 16.1, 8.6 Hz, 1H), 2.92 (dd,  $J$  = 16.2, 8.9 Hz, 1H), 2.68-2.60 (m, 4H), 1.56-1.44 (m, 6H);  $^{13}C$  NMR (75 MHz,  $CDCl_3$ ):  $\delta$  = 183.34, 141.50, 140.33, 137.67, 132.31, 131.87, 131.42, 130.98, 129.36, 127.78, 125.76, 125.53, 124.93, 123.58, 121.31, 118.75, 75.21, 62.01, 50.56, 26.29, 25.90, 23.78; HRMS (ESI) calcd for  $C_{23}H_{24}F_6N_3S$  ( $M + H^+$ ) 488.1595, found 488.1587.



### 3. Representative Procedure

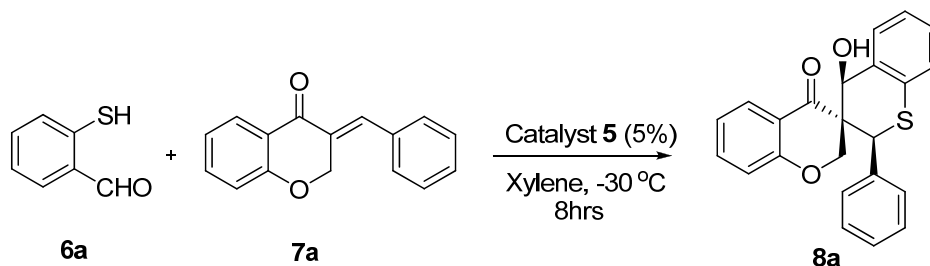

To a solution of 2-mercaptobenzaldehyde **6a** (13.8 mg, 0.1 mmol, 1 equiv.) in 0.95 mL xylene was added (E)-3-benzylidenechroman-4-one **7a** (20.4 mg, 0.1 mmol, 1 equiv.) at -30 °C, followed by adding of 50  $\mu$ L of pre-cooled catalyst **5** solution (2.6 mg in 50  $\mu$ L xylene, 0.005 mmol, 0.05 equiv.). The mixture was stirred at -30 °C for 8 h. The crude product was purified by column chromatography on silica gel, eluted by hexane/EtOAc= 10:1 then 6: 1 to afford 36 mg (96% yield) of the desired product **8a** as white solid.

### 4. Analytical Data

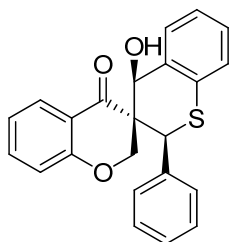

(2'*S*,3*S*,4'*R*)-4'-hydroxy-2'-phenylspiro[chroman-3,3'-thiochroman]-4-one (**8a**) (Table 2, entry 1).

$^1\text{H}$  NMR (300 MHz,  $\text{CDCl}_3$ ):  $\delta$  = 7.64-7.59 (m, 2H), 7.34-7.31 (m, 2H), 7.18-7.07 (m, 4H), 6.98-6.96 (m, 3H), 6.73 (t,  $J$  = 7.5 Hz, 1H), 6.50 (d,  $J$  = 8.3 Hz, 1H), 5.50 (d,  $J$  = 6.7 Hz, 1H), 5.00 (s, 1H), 4.77 (d,  $J$  = 12.6 Hz, 1H), 4.55 (d,  $J$  = 12.4 Hz, 1H), 2.78 (d,  $J$  = 6.7 Hz, 1H);  $^{13}\text{C}$  NMR (75 MHz,  $\text{CDCl}_3$ ):  $\delta$  = 195.32, 160.94, 136.09, 134.82, 133.23, 132.61, 129.50, 128.40, 127.82, 127.69, 127.17, 126.71, 125.19, 124.92, 121.58, 120.94, 117.55, 72.58, 66.86, 51.48, 51.37; HRMS (ESI) calcd for

$C_{23}H_{18}O_3SNa$  ( $M + Na^+$ ) 397.0874, found 397.0872; HPLC (Chiralpak IC, *i*-propanol/hexane = 10/90, flow rate 1.0 mL/min,  $\lambda = 254$  nm):  $t_{major} = 6.7$  min,  $t_{minor} = 9.6$  min,  $ee = 97\%$ ,  $dr = 8.0:1$ ;  $[\alpha]_D^{25}$  (major) = +162.8 ( $c = 1.07$  in  $CHCl_3$ ).

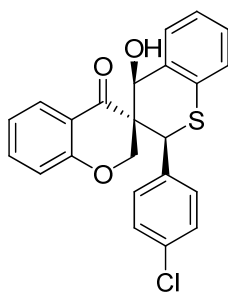

**(2'S,3S,4'R)-2'-(4-chlorophenyl)-4'-hydroxyspiro[chroman-3,3'-thiochroman]-4-one (8b)** (Table 2, entry 2). The title compound was prepared according the typical procedure, as described above in 98% yield.  $^1H$  NMR (300 MHz,  $CDCl_3$ ):  $\delta = 7.70$ - $7.67$  (m, 2H),  $7.35$ - $7.15$  (m, 6H),  $7.02$ - $6.99$  (m, 2H),  $6.86$ - $6.80$  (m, 1H),  $6.58$  (d,  $J = 8.1$  Hz, 1H),  $5.56$  (d,  $J = 6.4$  Hz, 1H),  $5.03$  (s, 1H),  $4.80$  (d,  $J = 12.5$  Hz, 1H),  $4.61$  (d,  $J = 12.5$  Hz, 1H),  $2.93$  (d,  $J = 6.6$  Hz, 1H);  $^{13}C$  NMR (125 MHz,  $CDCl_3$ ):  $\delta = 195.18$ ,  $160.85$ ,  $136.35$ ,  $134.19$ ,  $133.46$ ,  $133.06$ ,  $132.17$ ,  $130.85$ ,  $127.90$ ,  $127.78$ ,  $127.14$ ,  $126.68$ ,  $125.13$ ,  $125.07$ ,  $121.55$ ,  $121.22$ ,  $117.78$ ,  $72.85$ ,  $66.70$ ,  $51.40$ ,  $50.78$ ; HRMS (EI) calcd for  $C_{23}H_{17}ClO_3S$  408.0587, found 408.0573; HPLC (Chiralpak IC, *i*-propanol/hexane = 10/90, flow rate 1.0 mL/min,  $\lambda = 254$  nm):  $t_{major} = 6.1$  min,  $t_{minor} = 8.2$  min,  $ee = 95\%$ ,  $dr = 8.1:1$ ;  $[\alpha]_D^{25}$  (major) = +138.6 ( $c = 1.25$  in  $CHCl_3$ ).

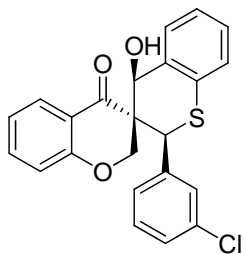

**(2'S,3S,4'R)-2'-(3-chlorophenyl)-4'-hydroxyspiro[chroman-3,3'-thiochroman]-4-one (8c)** (Table 2, entry 3). The title compound was prepared according the typical procedure, as described above in 96% yield.  $^1\text{H}$  NMR (300 MHz,  $\text{CDCl}_3$ ):  $\delta$  = 7.72-7.67 (m, 2H), 7.48 (s, 1H), 7.29-7.19 (m, 5H), 7.02-6.92 (m, 2H), 6.84 (t,  $J$  = 7.5 Hz, 1H), 6.61 (d,  $J$  = 8.2 Hz, 1H), 5.58 (d,  $J$  = 6.4 Hz, 1H), 5.01 (s, 1H), 4.81 (d,  $J$  = 12.6 Hz, 1H), 4.62 (d,  $J$  = 12.6 Hz, 1H), 2.78 (dd,  $J$  = 6.4, 2.8 Hz, 1H);  $^{13}\text{C}$  NMR (75 MHz,  $\text{CDCl}_3$ ):  $\delta$  = 195.04, 160.85, 136.96, 136.38, 133.64, 133.04, 132.02, 129.54, 128.79, 128.53, 127.90, 127.82, 127.17, 126.68, 125.17, 125.10, 121.54, 121.10, 117.66, 72.66, 66.59, 51.28, 50.95; HRMS (EI) calcd for  $\text{C}_{23}\text{H}_{17}\text{O}_4\text{S}$  408.0587, found 408.0568; HPLC (Chiralpak IC, *i*-propanol/hexane = 10/90, flow rate 1.0 mL/min,  $\lambda$  = 254 nm):  $t_{\text{major}}$  = 7.1 min,  $t_{\text{minor}}$  = 8.6 min,  $ee$  = 97%,  $dr$  = 7.6:1;  $[\alpha]_D^{25}$  (major) = +140.4 ( $c$  = 1.15 in  $\text{CHCl}_3$ ).

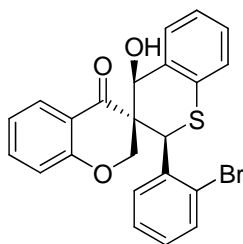

**(2'R,3S,4'R)-2'-(2-bromophenyl)-4'-hydroxyspiro[chroman-3,3'-thiochroman]-4-one (8d)** (Table 2, entry 4). The title compound was prepared according the typical procedure, as described above in 97% yield.  $^1\text{H}$  NMR (300 MHz,  $\text{CDCl}_3$ ):  $\delta$  = 8.00 (d,  $J$  = 7.9 Hz, 1H), 7.75 (dd,  $J$  = 7.9, 1.5 Hz, 1H), 7.64 (d,  $J$  = 7.3 Hz, 1H), 7.23-7.09 (m, 7H), 6.90-6.79 (m, 2H), 6.57 (d,  $J$  = 8.3 Hz, 1H), 5.68 (d,  $J$  =

7.2 Hz, 2H), 4.81 (d,  $J = 12.6$  Hz, 1H), 4.63 (d,  $J = 12.6$  Hz, 1H), 3.09 (d,  $J = 5.8$  Hz, 1H);  $^{13}\text{C}$  NMR (75 MHz,  $\text{CDCl}_3$ ):  $\delta = 193.88, 160.46, 136.17, 134.89, 133.36, 132.38, 132.23, 131.58, 129.74, 127.92, 127.38, 126.82, 125.43, 125.31, 124.94, 121.31, 120.93, 120.85, 117.42, 72.06, 66.95, 50.71, 48.35$ ; HRMS (ESI) calcd for  $\text{C}_{23}\text{H}_{17}\text{BrO}_4\text{SNa}$  ( $\text{M} + \text{Na}^+$ ) 474.9979, found 474.9978; HPLC (Chiralpak IC, *i*-propanol/hexane = 10/90, flow rate 1.0 mL/min,  $\lambda = 254$  nm):  $t_{\text{major}} = 6.5$  min,  $t_{\text{minor}} = 10.2$  min,  $ee = 95\%$ ,  $dr = 19.0:1$ ;  $[\alpha]_{\text{D}}^{25}$  (major) =  $+405.3$  ( $c = 1.50$  in  $\text{CHCl}_3$ ).

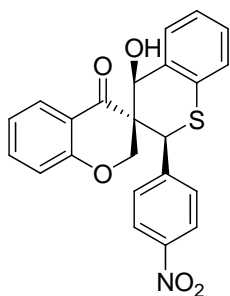

**(2'S,3S,4'R)-4'-hydroxy-2'-(4-nitrophenyl)spiro[chroman-3,3'-thiochroman]-4-one (8e)** (Table 2, entry 5). The title compound was prepared according the typical procedure, as described above in 97% yield.  $^1\text{H}$  NMR (300 MHz,  $\text{CDCl}_3$ ):  $\delta = 7.85\text{-}7.67$  (m, 3H), 7.31-7.17 (m, 4H), 6.94-6.84 (m, 2H), 6.65 (dd,  $J = 9.9, 1.9$  Hz, 1H), 6.53 (d,  $J = 8.5$  Hz, 1H), 5.65 (d,  $J = 5.8$  Hz, 1H), 5.35 (s, 1H), 4.77 (d,  $J = 12.6$  Hz, 1H), 4.60 (d,  $J = 12.7$  Hz, 1H), 2.98 (d,  $J = 5.8$  Hz, 1H);  $^{13}\text{C}$  NMR (75 MHz,  $\text{CDCl}_3$ ):  $\delta = 194.37, 160.58, 136.40, 134.88, 132.90, 131.89, 131.76, 127.86, 127.15, 126.68, 125.25, 125.20, 123.86, 121.16, 117.54, 115.25, 114.90, 71.91, 66.60, 50.61, 42.29$ ; HRMS (EI) calcd for  $\text{C}_{23}\text{H}_{17}\text{NO}_5\text{S}$  419.0827, found 419.0825; HPLC (Chiralpak IC, *i*-propanol/hexane = 10/90, flow rate 1.0 mL/min,  $\lambda = 254$  nm):  $t_{\text{major}} = 11.4$  min,  $t_{\text{minor}} = 14.0$  min,  $ee = 97\%$ ,  $dr = 7.7:1$ ;  $[\alpha]_{\text{D}}^{25}$  (major) =  $+92.2$  ( $c = 0.67$  in  $\text{CHCl}_3$ ).

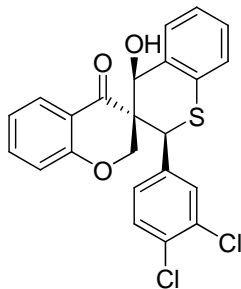

**(2'S,3S,4'R)-2'-(3,4-dichlorophenyl)-4'-hydroxyspiro[chroman-3,3'-thiochroman]-4-one(8f)** (Table 2, entry 6). The title compound was prepared according to the typical procedure, as described above in 97% yield. <sup>1</sup>H NMR (500 MHz, CDCl<sub>3</sub>): δ = 7.73-7.67 (m, 2H), 7.57 (d, *J* = 2.2 Hz, 1H), 7.32-7.29 (m, 1H), 7.26-7.16 (m, 4H), 7.08 (d, *J* = 8.5 Hz, 1H), 6.88-6.85 (m, 1H), 6.61 (d, *J* = 8.5 Hz, 1H), 5.56 (s, 1H), 4.97 (s, 1H), 4.78 (d, *J* = 12.6 Hz, 1H), 4.61 (d, *J* = 12.3 Hz, 1H), 2.81 (s, 1H); <sup>13</sup>C NMR (125 MHz, CDCl<sub>3</sub>): δ = 194.94, 160.75, 136.54, 135.26, 132.92, 132.36, 131.83, 131.68, 131.37, 129.36, 128.91, 127.98, 127.17, 126.68, 125.23, 125.14, 121.51, 121.35, 117.68, 72.56, 66.51, 51.22, 50.40; HRMS (EI) calcd for C<sub>23</sub>H<sub>17</sub>Cl<sub>2</sub>O<sub>3</sub>S 442.0197, found 442.0117; HPLC (Chiralpak IC, *i*-propanol/hexane = 10/90, flow rate 1.0 mL/min, λ = 254 nm): *t*<sub>major</sub> = 5.8 min, *t*<sub>minor</sub> = 6.9 min, *ee* = 95%, *dr* = 8.2:1; [α]<sub>D</sub><sup>25</sup>(major) = +125.5 (*c* = 1.40 in CHCl<sub>3</sub>).

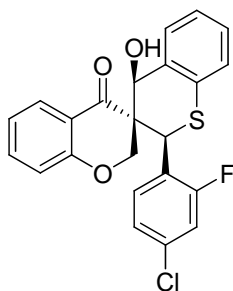

**(2'R,3S,4'R)-2'-(4-chloro-2-fluorophenyl)-4'-hydroxyspiro[chroman-3,3'-thiochroman]-4-one (8g)** (Table 2, entry 7). The title compound was prepared according to the typical procedure, as described above in 95% yield. <sup>1</sup>H NMR (300 MHz, CDCl<sub>3</sub>): δ = 7.88 (t, *J* = 7.1 Hz, 2H), 7.78 (d, *J* = 8.0 Hz,

1H), 7.73-7.69 (m, 1H), 7.59 (d,  $J = 8.8$  Hz, 0H), 7.49 (t,  $J = 7.5$  Hz, 1H), 7.39 (t,  $J = 7.4$  Hz, 1H), 7.24 (t,  $J = 5.3$  Hz, 1H), 6.84 (t,  $J = 7.6$  Hz, 1H), 6.54 (d,  $J = 8.3$  Hz, 0H), 5.61 (d,  $J = 6.0$  Hz, 1H), 5.12 (s, 1H), 4.80 (d,  $J = 12.7$  Hz, 1H), 4.62 (d,  $J = 12.7$  Hz, 1H), 2.78 (d,  $J = 6.1$  Hz, 1H);  $^{13}\text{C}$  NMR (75 MHz,  $\text{CDCl}_3$ ):  $\delta = 191.78, 160.70, 142.76, 140.05, 136.73, 134.61, 134.25, 133.84, 132.91, 130.57, 128.05, 127.18, 126.73, 126.31, 125.38, 125.19, 122.63, 121.48, 117.71, 72.50, 66.57, 51.62, 50.97$ ; HRMS (EI) calcd for  $\text{C}_{23}\text{H}_{16}\text{ClFO}_3\text{S}$  426.0493, found 426.0475; HPLC (Chiralpak IC, *i*-propanol/hexane = 10/90, flow rate 1.0 mL/min,  $\lambda = 254$  nm):  $t_{\text{major}} = 7.1$  min,  $t_{\text{minor}} = 8.6$  min,  $ee = 97\%$ ,  $dr = 20.0:1$ ;  $[\alpha]_{\text{D}}^{25}$  (major) = +150.6 ( $c = 1.23$  in  $\text{CHCl}_3$ ).

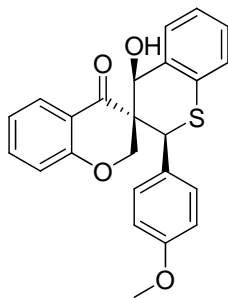

**(2'S,3S,4'R)-4'-hydroxy-2'-(4-methoxyphenyl)spiro[chroman-3,3'-thiochroman]-4-one (8h)** (Table 2, entry 8). The title compound was prepared according to the typical procedure, as described above in 96% yield.  $^1\text{H}$  NMR (500 MHz,  $\text{CDCl}_3$ ):  $\delta = 7.69$ -7.65 (m, 2H), 7.33-7.30 (m, 2H), 7.24-7.14 (m, 4H), 6.81-6.79 (m, 1H), 6.61-6.56 (m, 3H), 5.54 (d,  $J = 6.6$  Hz, 1H), 5.05 (s, 1H), 4.83 (d,  $J = 12.6$  Hz, 1H), 4.62 (d,  $J = 12.3$  Hz, 1H), 3.64 (s, 3H), 2.88 (d,  $J = 6.6$  Hz, 1H);  $^{13}\text{C}$  NMR (125 MHz,  $\text{CDCl}_3$ ):  $\delta = 195.48, 160.93, 159.47, 136.02, 133.23, 132.80, 130.67, 127.77, 127.14, 126.68, 126.61, 125.07, 124.82, 121.65, 120.95, 117.74, 113.07, 73.05, 66.85, 55.18, 51.47, 50.74$ ; HRMS (ESI) calcd for  $\text{C}_{24}\text{H}_{20}\text{O}_4\text{SNa}$  ( $\text{M} + \text{Na}^+$ ) 427.0980, found 427.0991; HPLC (Chiralpak IC, *i*-propanol/hexane = 10/90, flow rate 1.0 mL/min,  $\lambda = 254$  nm):  $t_{\text{major}} = 9.6$  min,  $t_{\text{minor}} = 14.1$  min,  $ee = 96\%$ ,  $dr = 8.0:1$ ;  $[\alpha]_{\text{D}}^{25}$

(major) = +116.4 ( $c = 1.17$  in  $\text{CHCl}_3$ ).

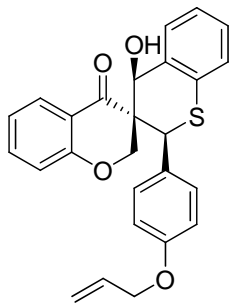

**(2'S,3S,4'R)-2'-(4-(allyloxy)phenyl)-4'-hydroxyspiro[chroman-3,3'-thiochroman]-4-one (8i)** (Table 2, entry 9). The title compound was prepared according the typical procedure, as described above in 96% yield.  $^1\text{H}$  NMR (300 MHz,  $\text{CDCl}_3$ ):  $\delta = 7.71$ -7.65 (m, 2H), 7.32-7.17 (m, 6H), 6.83 (t,  $J = 7.5$  Hz, 1H), 6.62-6.57 (m, 3H), 5.93 (ddd,  $J = 22.8, 10.6, 5.5$  Hz, 1H), 5.55 (d,  $J = 6.6$  Hz, 1H), 5.25 (m, 2H), 5.04 (s, 1H), 4.84 (d,  $J = 12.4$  Hz, 1H), 4.62 (d,  $J = 12.4$  Hz, 1H), 4.38 (d,  $J = 5.3$  Hz, 2H), 2.70 (d,  $J = 6.9$  Hz, 1H);  $^{13}\text{C}$  NMR (125 MHz,  $\text{CDCl}_3$ ):  $\delta = 195.45, 160.92, 158.45, 136.04, 133.16, 132.99, 132.78, 130.64, 127.79, 127.13, 126.75, 126.68, 125.08, 124.83, 121.63, 120.96, 117.77, 117.54, 113.91, 73.01, 68.64, 66.83, 51.44, 50.75$ ; HRMS (ESI) calcd for  $\text{C}_{26}\text{H}_{22}\text{O}_4\text{SNa}$  ( $\text{M} + \text{Na}^+$ ) 453.1136, found 453.1119; HPLC (Chiralpak IC, *i*-propanol/hexane = 10/90, flow rate 1.0 mL/min,  $\lambda = 254$  nm):  $t_{\text{major}} = 8.6$  min,  $t_{\text{minor}} = 12.7$  min,  $ee = 96\%$ ,  $dr = 8.0:1$ ;  $[\alpha]_{\text{D}}^{25}$  (major) = +227.3 ( $c = 1.17$  in  $\text{CHCl}_3$ ).

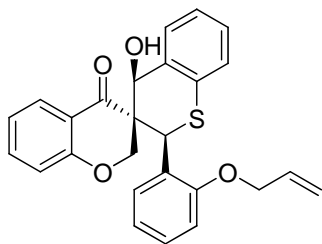

**(2'S,3S,4'R)-2'-(2-(allyloxy)phenyl)-4'-hydroxyspiro[chroman-3,3'-thiochroman]-4-one (8j)** (Table

2, entry 10). The title compound was prepared according the typical procedure, as described above in 98% yield.  $^1\text{H}$  NMR (500 MHz,  $\text{CDCl}_3$ ):  $\delta$  = 7.86 (dd,  $J$  = 7.9 Hz, 1.6, 1H), 7.68-7.64 (m, 2H), 7.24-7.15 (m, 4H), 6.96-6.93 (m, 1H), 6.79-6.75 (m, 2H), 6.46 (d,  $J$  = 8.2 Hz, 1H), 6.38 (d,  $J$  = 8.2 Hz, 1H), 6.02 (dddd,  $J$  = 17.3, 10.4, 5.7, 5.0 Hz, 1H), 5.65 (s, 2H), 5.36 (ddd,  $J$  = 17.0, 3.0, 1.6 Hz, 1H), 5.27 (m, 1H), 4.69 (d,  $J$  = 12.6 Hz, 1H), 4.55 (m, 1H), 4.26 (m, 1H), 4.17 (m, 1H), 3.22 (d,  $J$  = 5.4 Hz, 1H);  $^{13}\text{C}$  NMR (125 MHz,  $\text{CDCl}_3$ ):  $\delta$  = 194.48, 160.64, 155.65, 135.71, 133.47, 133.05, 132.96, 130.55, 129.21, 127.62, 127.02, 126.26, 125.51, 124.95, 124.15, 121.10, 120.36, 119.95, 117.52, 117.33, 110.28, 71.95, 68.87, 66.99, 50.82, 42.65; HRMS (ESI) calcd for  $\text{C}_{26}\text{H}_{22}\text{O}_4\text{SNa}$  ( $\text{M} + \text{Na}^+$ ) 453.1136, found 453.1141; HPLC (Chiralpak IC, *i*-propanol/hexane = 10/90, flow rate 1.0 mL/min,  $\lambda$  = 254 nm):  $t_{\text{major}}$  = 6.4 min,  $t_{\text{minor}}$  = 7.3 min,  $ee$  = 99%,  $dr$  = 11.0:1;  $[\alpha]_{\text{D}}^{25}$  (major) = +465.9 ( $c$  = 1.33 in  $\text{CHCl}_3$ ).

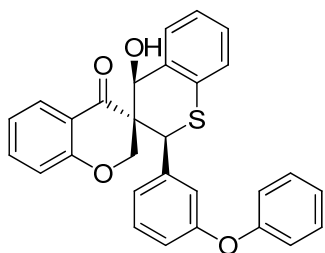

(2'*S*,3*S*,4'*R*)-4'-hydroxy-2'-(3-phenoxyphenyl)spiro[chroman-3,3'-thiochroman]-4-one (**8k**) (Table 2, entry 11). The title compound was prepared according the typical procedure, as described above in 97% yield.  $^1\text{H}$  NMR (500 MHz,  $\text{CDCl}_3$ ):  $\delta$  = 7.73-7.65 (m, 2H), 7.31-7.98 (m, 10H), 6.87-6.84 (m, 1H), 6.77-6.75 (m, 2H), 6.69-6.63 (m, 2H), 5.55 (s, 1H), 5.02 (s, 1H), 4.81 (d,  $J$  = 12.6 Hz, 1H), 4.61 (d,  $J$  = 12.3 Hz, 1H), 3.09 (s, 1H);  $^{13}\text{C}$  NMR (125 MHz,  $\text{CDCl}_3$ ):  $\delta$  = 195.28, 161.03, 157.06, 156.24, 136.88, 136.19, 133.09, 132.30, 129.59, 128.93, 127.78, 127.14, 126.79, 125.11, 124.91, 124.63, 123.08, 121.56, 120.98, 120.35, 119.11, 118.42, 117.79, 72.75, 66.65, 51.54, 51.29; HRMS (ESI) calcd for  $\text{C}_{29}\text{H}_{22}\text{O}_4\text{SNa}$  ( $\text{M} + \text{Na}^+$ ) 489.1136, found 489.1143; HPLC (Chiralpak IC, *i*-propanol/hexane =



10/90, flow rate 1.0 mL/min,  $\lambda = 254$  nm):  $t_{\text{major}} = 6.5$  min,  $t_{\text{minor}} = 7.2$  min,  $ee = 98\%$ ,  $dr = 11.0:1$ ;

$[\alpha]_{\text{D}}^{25}(\text{major}) = +164.9$  ( $c = 1.50$  in  $\text{CHCl}_3$ ).

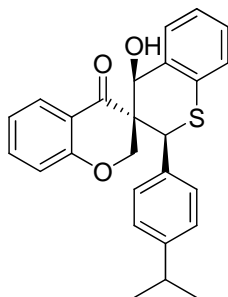

**(2'S,3S,4'R)-4'-hydroxy-2'-(4-isopropylphenyl)spiro[chroman-3,3'-thiochroman]-4-one (8I)** (Table 2, entry 12). The title compound was prepared according the typical procedure, as described above in 97% yield.  $^1\text{H}$  NMR (500 MHz,  $\text{CDCl}_3$ ):  $\delta = 7.68\text{-}7.65$  (m, 2H), 7.29 (d,  $J = 8.2$  Hz, 2H), 7.21-7.14 (m, 4H), 6.86 (d,  $J = 8.2$  Hz, 2H), 6.78-6.75 (m, 1H), 6.52 (d,  $J = 8.2$  Hz, 1H), 5.58 (d,  $J = 6.3$  Hz, 1H), 5.03 (s, 1H), 4.85 (d,  $J = 12.3$  Hz, 1H), 4.61 (d,  $J = 12.3$  Hz, 1H), 2.93 (d,  $J = 6.6$  Hz, 1H), 2.67 (dt,  $J = 13.9, 6.9$  Hz, 1H), 1.04 (dd,  $J = 6.9, 0.9$  Hz, 6H);  $^{13}\text{C}$  NMR (125 MHz,  $\text{CDCl}_3$ ):  $\delta = 195.44, 160.84, 149.17, 135.88, 133.17, 132.71, 131.87, 129.35, 127.74, 127.19, 126.67, 125.56, 125.15, 124.81, 121.53, 120.66, 117.64, 72.67, 66.70, 51.32, 51.14, 33.67, 23.68, 23.66$ ; HRMS (ESI) calcd for  $\text{C}_{26}\text{H}_{24}\text{O}_3\text{SNa}$  ( $\text{M} + \text{Na}^+$ ) 439.1344, found 439.1321; HPLC (Chiralpak IC, *i*-propanol/hexane = 10/90, flow rate 1.0 mL/min,  $\lambda = 254$  nm):  $t_{\text{major}} = 7.0$  min,  $t_{\text{minor}} = 10.9$  min,  $ee = 97\%$ ,  $dr = 8.0:1$ ;  $[\alpha]_{\text{D}}^{25}(\text{major}) = +150.5$  ( $c = 1.00$  in  $\text{CHCl}_3$ ).

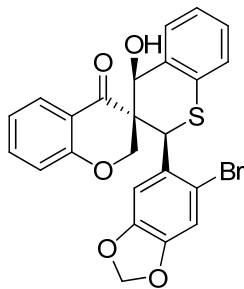

**(2'R,3S,4'R)-2'-(5-bromobenzo[d][1,3]dioxol-4-yl)-4'-hydroxyspiro[chroman-3,3'-thiochroman]-4-one (8m)** (Table 2, entry 13). The title compound was prepared according the typical procedure, as described above in 98% yield. <sup>1</sup>H NMR (500 MHz, CDCl<sub>3</sub>): δ = 7.76-7.74 (m, 1H), 7.63 (d, *J* = 7.6 Hz, 1H), 7.47 (s, 1H), 7.31-7.17 (m, 4H), 6.86-6.83 (m, 1H), 6.68 (d, *J* = 8.2 Hz, 1H), 6.63 (s, 1H), 5.84 (dd, *J* = 38.0, 1.4 Hz, 2H), 5.63 (d, *J* = 24.0 Hz, 2H), 4.79 (d, *J* = 12.6 Hz, 1H), 4.64 (d, *J* = 12.6 Hz, 1H), 3.12 (s, 1H); <sup>13</sup>C NMR (125 MHz, CDCl<sub>3</sub>): δ = 193.85, 160.42, 148.04, 146.88, 136.10, 133.29, 132.31, 127.92, 127.59, 127.43, 126.82, 125.39, 125.27, 121.03, 120.93, 117.34, 115.76, 111.72, 110.92, 101.80, 71.95, 66.75, 50.66, 48.47; HRMS (ESI) calcd for C<sub>24</sub>H<sub>17</sub>BrO<sub>5</sub>SNa (M + Na<sup>+</sup>) 518.9878, found 518.9897; HPLC (Chiralpak IC, *i*-propanol/hexane = 10/90, flow rate 1.0 mL/min, λ = 254 nm): t<sub>major</sub> = 8.6 min, t<sub>minor</sub> = 13.0 min, *ee* = 98%, *dr* = 17.0:1; [α]<sub>D</sub><sup>25</sup> (major) = +147.3 (*c* = 1.23 in CHCl<sub>3</sub>).

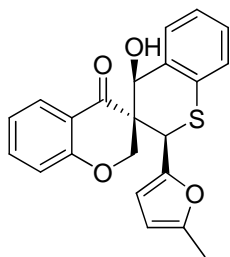

**(2'R,3S,4'R)-4'-hydroxy-2'-(5-methylfuran-2-yl)spiro[chroman-3,3'-thiochroman]-4-one (8n)** (Table 2, entry 14). The title compound was prepared according the typical procedure, as described above in 96% yield. <sup>1</sup>H NMR (500 MHz, CDCl<sub>3</sub>): δ = 7.82 (dd, *J* = 7.9 Hz, 1.6, 1H), 7.65 (d, *J* = 7.6 Hz, 1H), 7.37 (ddd, *J* = 8.8, 7.3, 1.9 Hz, 1H), 7.20-7.15 (m, 3H), 6.94-6.90 (m, 1H), 6.78 (m,

1H), 6.20 (d,  $J = 3.2$  Hz, 1H), 5.67 (m, 1H), 5.41 (d,  $J = 6.3$  Hz, 1H), 5.09 (s, 1H), 4.70 (d,  $J = 12.6$  Hz, 1H), 4.59 (d,  $J = 12.3$  Hz, 1H), 3.01 (d,  $J = 7.3$  Hz, 1H), 1.98 (s, 3H);  $^{13}\text{C}$  NMR (126 MHz,  $\text{CDCl}_3$ ):  $\delta =$  194.92, 161.35, 152.20, 146.68, 136.00, 133.47, 131.97, 127.82, 127.40, 127.03, 125.24, 125.06, 121.36, 121.14, 117.74, 111.00, 106.21, 72.50, 67.37, 51.10, 43.26, 13.19; HRMS (ESI) calcd for  $\text{C}_{22}\text{H}_{18}\text{O}_4\text{SNa}$  ( $\text{M} + \text{Na}^+$ ) 401.0823, found 401.0825; HPLC (Chiralpak IC, *i*-propanol/hexane = 10/90, flow rate 1.0 mL/min,  $\lambda = 254$  nm):  $t_{\text{major}} = 7.8$  min,  $t_{\text{minor}} = 9.1$  min,  $ee = 96\%$ ,  $dr = 8.4:1$ ;  $[\alpha]_{\text{D}}^{25}$  (major) = +80.1 ( $c = 1.33$  in  $\text{CHCl}_3$ ).

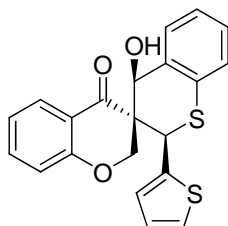

**(2'R,3S,4'R)-4'-hydroxy-2'-(thiophen-2-yl)spiro[chroman-3,3'-thiochroman]-4-one (8o)** (Table 2, entry 15). The title compound was prepared according the typical procedure, as described above in 98% yield.  $^1\text{H}$  NMR (500 MHz,  $\text{CDCl}_3$ ):  $\delta = 7.78$ - $7.76$  (m, 2H), 7.34-7.31 (m, 1H), 7.25-7.16 (m, 3H), 7.04 (dd,  $J = 8.0$  Hz, 4.3, 2H), 6.88 (t,  $J = 7.1$  Hz, 1H), 6.72 (dd,  $J = 5.0, 3.5$  Hz, 2H), 5.46-5.43 (m, 2H), 4.80 (d,  $J = 12.3$  Hz, 1H), 4.63 (d,  $J = 12.3$  Hz, 1H), 2.99 (d,  $J = 7.9$  Hz, 1H);  $^{13}\text{C}$  NMR (125 MHz,  $\text{CDCl}_3$ ):  $\delta = 195.23, 161.28, 137.75, 136.18, 133.41, 132.33, 128.52, 127.91, 127.17, 126.96, 126.31, 125.57, 125.15, 124.87, 122.00, 121.34, 117.88, 73.68, 67.16, 51.67, 45.56$ ; HRMS (ESI) calcd for  $\text{C}_{21}\text{H}_{16}\text{O}_4\text{S}_2\text{Na}$  ( $\text{M} + \text{Na}^+$ ) 403.0439, found 403.0420; HPLC (Chiralpak IC, *i*-propanol/hexane = 10/90, flow rate 1.0 mL/min,  $\lambda = 254$  nm):  $t_{\text{major}} = 7.6$  min,  $t_{\text{minor}} = 9.3$  min,  $ee = 97\%$ ,  $dr = 8.3:1$ ;  $[\alpha]_{\text{D}}^{25}$  (major) = +129.2 ( $c = 1.40$  in  $\text{CHCl}_3$ ).

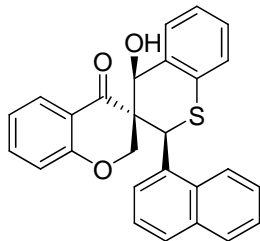

**(2'S,3S,4'R)-4'-hydroxy-2'-(naphthalen-1-yl)spiro[chroman-3,3'-thiochroman]-4-one (8p)** (Table 2, entry 16). The title compound was prepared according to the typical procedure, as described above in 95% yield.  $^1\text{H}$  NMR (500 MHz,  $\text{CDCl}_3$ ):  $\delta$  = 8.18 (d,  $J$  = 6.7 Hz, 1H), 7.91 (d,  $J$  = 8.5 Hz, 1H), 7.62 (dd,  $J$  = 22.6 Hz, 7.9, 2H), 7.52 (d,  $J$  = 8.2 Hz, 1H), 7.45-7.41 (m, 1H), 7.34-7.16 (m, 7H), 7.07-7.04 (m, 1H), 6.48-6.45 (m, 2H), 6.07 (s, 1H), 5.77 (d,  $J$  = 6.4 Hz, 1H), 4.87 (d,  $J$  = 12.5 Hz, 1H), 4.68 (s, 1H), 3.40 (d,  $J$  = 6.4 Hz, 1H);  $^{13}\text{C}$  NMR (125 MHz,  $\text{CDCl}_3$ ):  $\delta$  = 194.93, 160.49, 135.95, 133.53, 133.10, 133.07, 131.29, 131.01, 129.08, 128.49, 127.93, 127.90, 127.51, 126.29, 126.11, 125.63, 125.31, 125.23, 124.53, 122.70, 120.85, 120.37, 117.25, 72.62, 67.10, 51.15, 44.50; HRMS (ESI) calcd for  $\text{C}_{27}\text{H}_{20}\text{O}_3\text{SNa}$  ( $\text{M} + \text{Na}^+$ ) 447.1031, found 447.1021; HPLC (Chiralpak IC, *i*-propanol/hexane = 10/90, flow rate 1.0 mL/min,  $\lambda$  = 254 nm):  $t_{\text{major}}$  = 7.7 min,  $t_{\text{minor}}$  = 10.6 min,  $ee$  = 95%,  $dr$  = 4.5:1;  $[\alpha]_{\text{D}}^{25}$  (major) = +545.0 ( $c$  = 1.00 in  $\text{CHCl}_3$ ).

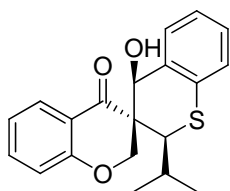

**(2'S,3S,4'R)-4'-hydroxy-2'-isopropylspiro[chroman-3,3'-thiochroman]-4-one (8q)** (Table 2, entry 17). The title compound was prepared according to the typical procedure, as described above in 96% yield.  $^1\text{H}$  NMR (300 MHz,  $\text{CDCl}_3$ ):  $\delta$  = 7.93-7.90 (m, 1H), 7.61-7.45 (m, 2H), 7.19-6.92 (m, 5H), 5.24

(d,  $J = 7.3$  Hz, 1H), 4.50 (q,  $J = 12.4$  Hz, 2H), 4.03 (d,  $J = 4.7$  Hz, 1H), 2.84 (d,  $J = 7.3$  Hz, 1H), 2.02-1.91 (m, 1H), 1.07 (d,  $J = 6.6$  Hz, 3H), 0.97 (d,  $J = 6.7$  Hz, 3H);  $^{13}\text{C}$  NMR (75 MHz,  $\text{CDCl}_3$ ):  $\delta =$  196.70, 161.62, 136.41, 133.86, 132.66, 127.64, 127.09, 126.34, 125.49, 124.56, 122.70, 121.81, 118.25, 75.26, 66.93, 54.81, 51.77, 30.03, 24.24, 19.27; HRMS (ESI) calcd for  $\text{C}_{20}\text{H}_{20}\text{O}_3\text{SNa}$  ( $\text{M} + \text{Na}^+$ ) 363.1031, found 363.1038; HPLC (Chiralpak IC, *i*-propanol/hexane = 10/90, flow rate 1.0 mL/min,  $\lambda =$  254 nm):  $t_{\text{major}} = 7.3$  min,  $t_{\text{minor}} = 8.6$  min,  $ee = 95\%$ ,  $dr = 57.0:1$ ;  $[\alpha]_{\text{D}}^{25}$  (major) = +48.4 ( $c = 1.03$  in  $\text{CHCl}_3$ ).

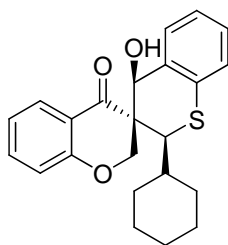

**(2'S,3S,4'R)-2'-cyclohexyl-4'-hydroxyspiro[chroman-3,3'-thiochroman]-4-one (8r)** (Table 2, entry 18). The title compound was prepared according to the typical procedure, as described above in 98% yield.  $^1\text{H}$  NMR (300 MHz,  $\text{CDCl}_3$ ):  $\delta = 7.92$  (dd,  $J = 7.9$  Hz, 1.6, 1H), 7.60-7.46 (m, 2H), 7.17-6.93 (m, 5H), 5.20 (d,  $J = 7.2$  Hz, 1H), 4.50 (q,  $J = 12.3$  Hz, 2H), 4.00 (d,  $J = 4.9$  Hz, 1H), 2.77 (d,  $J = 7.6$  Hz, 1H), 2.04 (d,  $J = 12.7$  Hz, 1H), 1.70-1.43 (m, 4H), 1.26-0.83 (m, 6H);  $^{13}\text{C}$  NMR (75 MHz,  $\text{CDCl}_3$ ):  $\delta =$  196.45, 161.53, 136.29, 134.04, 132.84, 127.64, 127.10, 126.27, 125.42, 124.58, 122.81, 121.83, 118.13, 110.18, 75.48, 67.20, 53.86, 51.31, 40.16, 34.34, 30.27, 26.63, 26.32, 25.85; HRMS (ESI) calcd for  $\text{C}_{23}\text{H}_{24}\text{O}_3\text{SNa}$  ( $\text{M} + \text{Na}^+$ ) 403.1344, found 403.1345; HPLC (Chiralpak IC, *i*-propanol/hexane = 10/90, flow rate 1.0 mL/min,  $\lambda = 254$  nm):  $t_{\text{major}} = 5.7$  min,  $t_{\text{minor}} = 6.3$  min,  $ee = 96\%$ ,  $dr = 24.0:1$ ;  $[\alpha]_{\text{D}}^{25}$  (major) = +103.7 ( $c = 1.05$  in  $\text{CHCl}_3$ ).

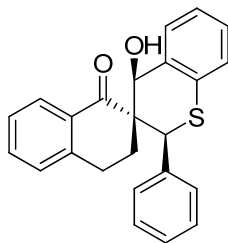

**(2*S*,2'*S*,4'*R*)-4'-hydroxy-2'-phenyl-3,4-dihydro-1*H*-spiro[naphthalene-2,3'-thiochroman]-1-one (8s)**

(Table 2, entry 19). The title compound was prepared according to the typical procedure, as described above in 96% yield. <sup>1</sup>H NMR (500 MHz, CDCl<sub>3</sub>): δ = 7.79-7.77 (m, 1H), 7.64 (d, *J* = 7.6 Hz, 1H), 7.44-7.42 (m, 2H), 7.29-7.10 (m, 8H), 6.94 (d, *J* = 7.6 Hz, 1H), 5.47 (s, 1H), 5.38 (d, *J* = 6.3 Hz, 1H), 2.98 (d, *J* = 6.6 Hz, 1H), 2.93-2.87 (m, 1H), 2.39-2.33 (m, 1H), 2.18-2.03 (m, 2H); <sup>13</sup>C NMR (125 MHz, CDCl<sub>3</sub>): δ = 202.37, 144.23, 136.57, 135.20, 133.71, 133.68, 133.50, 129.88, 128.17, 128.07, 128.05, 127.33, 127.12, 126.28, 126.14, 125.12, 124.52, 77.38, 52.58, 52.57, 25.94, 22.02; HRMS (ESI) calcd for C<sub>24</sub>H<sub>20</sub>O<sub>2</sub>SNa (M + Na<sup>+</sup>) 395.1082, found 395.1088; HPLC (Chiralpak IC, *i*-propanol/hexane = 10/90, flow rate 1.0 mL/min, λ = 254 nm): *t*<sub>major</sub> = 7.1 min, *t*<sub>minor</sub> = 8.2 min, *ee* = 95%, *dr* = 10.0:1; [α]<sub>D</sub><sup>25</sup> (major) = + 49.0 (*c* = 1.20 in CHCl<sub>3</sub>).

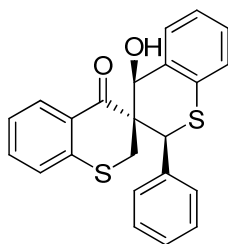

**(2'*S*,3*S*,4'*R*)-4'-hydroxy-2'-phenyl-3,3'-spirobi[thiochroman]-4-one (8t)** (Table 2, entry 20). The title compound was prepared according to the typical procedure, as described above in 97% yield. <sup>1</sup>H NMR (500 MHz, CDCl<sub>3</sub>): δ = 7.97-7.96 (m, 1H), 7.69-7.68 (m, 1H), 7.50-7.48 (m, 2H), 7.29-7.09 (m, 9H), 5.52 (s, 1H), 5.30 (d, *J* = 11.0 Hz, 1H), 3.54 (dd, *J* = 14.2, 1.3 Hz, 1H), 3.48 (d, *J* = 11.0 Hz, 1H),

3.27 (d,  $J = 14.2$  Hz, 1H);  $^{13}\text{C}$  NMR (125 MHz,  $\text{CDCl}_3$ ):  $\delta = 196.36, 139.71, 135.69, 135.22, 133.21, 133.03, 132.88, 130.24, 130.12, 128.41, 128.18, 127.91, 127.66, 126.39, 125.79, 125.30, 125.03, 78.40, 51.67, 51.36, 28.02$ ; HRMS (EI) calcd for  $\text{C}_{23}\text{H}_{18}\text{O}_2\text{S}_2$  390.0748, found 390.0730; HPLC (Chiralpak IC, *i*-propanol/hexane = 5/95, flow rate 1.0 mL/min,  $\lambda = 254$  nm):  $t_{\text{major}} = 14.3$  min,  $t_{\text{minor}} = 15.6$  min,  $ee = 96\%$ ,  $dr = 1.2:1$ ;  $[\alpha]_{\text{D}}^{25}$  (major) =  $-55.4$  ( $c = 0.93$  in  $\text{CHCl}_3$ ).

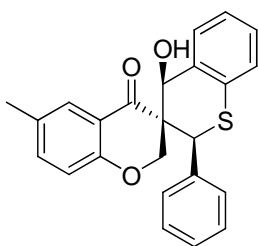

**(2'S,3S,4'R)-4'-hydroxy-6-methyl-2'-phenylspiro[chroman-3,3'-thiochroman]-4-one (8u)** (Table 2, entry 21). The title compound was prepared according the typical procedure, as described above in 98% yield.  $^1\text{H}$  NMR (500 MHz,  $\text{CDCl}_3$ ):  $\delta = 7.69\text{-}7.67$  (m, 1H),  $7.44\text{-}7.39$  (m, 3H),  $7.21$  (t,  $J = 3.8$  Hz, 2H),  $7.18\text{-}7.14$  (m, 1H),  $7.06\text{-}7.01$  (m, 4H),  $6.47$  (d,  $J = 8.5$  Hz, 1H),  $5.54$  (d,  $J = 6.9$  Hz, 1H),  $5.09$  (s, 1H),  $4.79$  (d,  $J = 12.6$  Hz, 1H),  $4.60$  (d,  $J = 12.3$  Hz, 1H),  $3.15$  (d,  $J = 6.6$  Hz, 1H),  $2.13$  (s, 3H);  $^{13}\text{C}$  NMR (125 MHz,  $\text{CDCl}_3$ ):  $\delta = 195.51, 159.12, 137.28, 134.96, 133.44, 132.67, 130.33, 129.54, 128.32, 127.74, 127.68, 127.14, 126.19, 125.14, 124.86, 121.23, 117.43, 73.19, 66.86, 51.55, 51.29, 20.24$ ; HRMS (ESI) calcd for  $\text{C}_{24}\text{H}_{20}\text{O}_3\text{SNa}$  ( $\text{M} + \text{Na}^+$ ) 411.1031, found 411.1018; HPLC (Chiralpak IC, *i*-propanol/hexane = 10/90, flow rate 1.0 mL/min,  $\lambda = 254$  nm):  $t_{\text{major}} = 7.3$  min,  $t_{\text{minor}} = 13.2$  min,  $ee = 97\%$ ,  $dr = 16.0:1$ ;  $[\alpha]_{\text{D}}^{25}$  (major) =  $+109.5$  ( $c = 1.57$  in  $\text{CHCl}_3$ ).

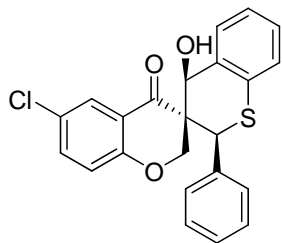

**(2'S,3S,4'R)-6-chloro-4'-hydroxy-2'-phenylspiro[chroman-3,3'-thiochroman]-4-one (8v)** (Table 2, entry 22). The title compound was prepared according the typical procedure, as described above in 97% yield.  $^1\text{H}$  NMR (500 MHz,  $\text{CDCl}_3$ )  $\delta$  = 7.65 (dd,  $J=9.6, 5.2, 2\text{H}$ ), 7.38 (dd,  $J=6.6, 2.8, 2\text{H}$ ), 7.23-7.15 (m, 4H), 7.08-7.06 (m, 3H), 6.53 (d,  $J=9.1, 1\text{H}$ ), 5.57 (d,  $J=6.0, 1\text{H}$ ), 5.05 (s, 1H), 4.86 (d,  $J=12.6, 1\text{H}$ ), 4.61 (d,  $J=12.6, 1\text{H}$ ), 2.81 (d,  $J=6.3, 1\text{H}$ );  $^{13}\text{C}$  NMR (125 MHz,  $\text{CDCl}_3$ ):  $\delta$  = 194.71, 159.42, 135.89, 134.42, 132.93, 132.41, 129.42, 128.58, 127.86, 127.75, 127.17, 126.37, 125.75, 125.13, 124.94, 122.02, 119.41, 72.74, 66.88, 51.51, 51.46; HRMS (EI) calcd for  $\text{C}_{23}\text{H}_{17}\text{ClO}_3\text{S}$  431.0485, found 431.0466; HPLC (Chiralpak IC, *i*-propanol/hexane = 10/90, flow rate 1.0 mL/min,  $\lambda$  = 254 nm):  $t_{\text{major}}$  = 5.6 min,  $t_{\text{minor}}$  = 7.1 min,  $ee$  = 98%,  $dr$  = 11.0:1;  $[\alpha]_{\text{D}}^{25}$  (major) = +205.2 ( $c$  = 1.33 in  $\text{CHCl}_3$ ).

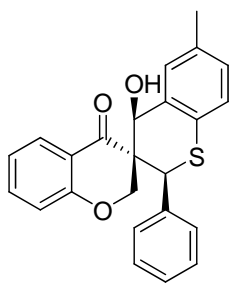

**(2'S,3S,4'R)-4'-hydroxy-6'-methyl-2'-phenylspiro[chroman-3,3'-thiochroman]-4-one (8w)** (Table 2, entry 23). The title compound was prepared according the typical procedure, as described above in 96% yield.  $^1\text{H}$  NMR (500 MHz,  $\text{CDCl}_3$ ):  $\delta$  = 7.71-7.69 (m, 1H), 7.48 (s, 1H), 7.40-7.38 (m, 2H), 7.26-7.22 (m, 2H), 7.11 (d,  $J$  = 8.2 Hz, 1H), 7.05 (d,  $J$  = 6.6 Hz, 4H), 6.81 (t,  $J$  = 7.6 Hz, 1H), 6.58 (d,  $J$



= 8.5 Hz, 1H), 5.54 (d,  $J = 6.6$  Hz, 1H), 5.05 (s, 1H), 4.83 (d,  $J = 12.3$  Hz, 1H), 4.62 (d,  $J = 12.6$  Hz, 1H), 2.72 (d,  $J = 6.9$  Hz, 1H), 2.34 (s, 3H);  $^{13}\text{C}$  NMR (125 MHz,  $\text{CDCl}_3$ ):  $\delta = 195.32, 160.96, 136.04, 135.04, 134.73, 133.07, 129.48, 128.96, 128.75, 128.34, 127.75, 127.69, 126.75, 125.21, 121.59, 120.93, 117.71, 73.02, 67.04, 51.72, 51.23, 21.12$ ; HRMS (ESI) calcd for  $\text{C}_{24}\text{H}_{20}\text{O}_3\text{SNa}$  ( $\text{M} + \text{Na}^+$ ) 411.1031, found 411.1011; HPLC (Chiralpak IC, *i*-propanol/hexane = 10/90, flow rate 1.0 mL/min,  $\lambda = 254$  nm):  $t_{\text{major}} = 6.7$  min,  $t_{\text{minor}} = 11.4$  min,  $ee = 96\%$ ,  $dr = 9.0:1$ ;  $[\alpha]_{\text{D}}^{25}$  (major) =  $+85.5$  ( $c = 1.33$  in  $\text{CHCl}_3$ ).

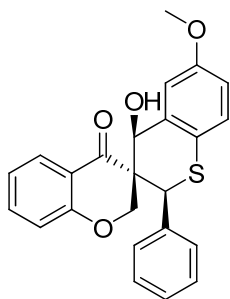

**(2'S,3S,4'R)-4'-hydroxy-6'-methoxy-2'-phenylspiro[chroman-3,3'-thiochroman]-4-one (8x)** (Table 2, entry 24). The title compound was prepared according the typical procedure, as described above in 97% yield.  $^1\text{H}$  NMR (500 MHz,  $\text{CDCl}_3$ ):  $\delta = 7.70\text{-}7.68$  (m, 1H), 7.39-7.37 (m, 2H), 7.26-7.22 (m, 2H), 7.13 (d,  $J = 8.5$  Hz, 1H), 7.06-7.03 (m, 3H), 6.82 (m, 2H), 6.58 (d,  $J = 8.2$  Hz, 1H), 5.53 (d,  $J = 6.6$  Hz, 1H), 5.05 (s, 1H), 4.80 (d,  $J = 12.6$  Hz, 1H), 4.61 (d,  $J = 12.3$  Hz, 1H), 3.81 (s, 3H), 2.82 (d,  $J = 6.9$  Hz, 1H);  $^{13}\text{C}$  NMR (125 MHz,  $\text{CDCl}_3$ ):  $\delta = 195.33, 160.97, 157.65, 136.08, 135.15, 134.78, 129.42, 128.32, 127.69, 126.75, 126.45, 123.17, 121.53, 120.94, 117.70, 114.59, 112.53, 73.11, 67.02, 55.44, 51.89, 51.28$ ; HRMS (ESI) calcd for  $\text{C}_{24}\text{H}_{20}\text{O}_4\text{SNa}$  ( $\text{M} + \text{Na}^+$ ) 427.0980, found 427.0989; HPLC (Chiralpak IC, *i*-propanol/hexane = 10/90, flow rate 1.0 mL/min,  $\lambda = 254$  nm):  $t_{\text{major}} = 9.9$  min,  $t_{\text{minor}} = 18.2$  min,  $ee = 95\%$ ,  $dr = 15.0:1$ ;  $[\alpha]_{\text{D}}^{25}$  (major) =  $+59.5$  ( $c = 1.10$  in  $\text{CHCl}_3$ ).

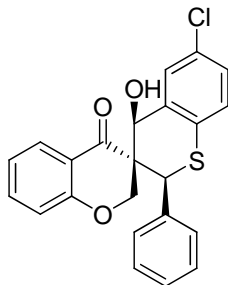

(2'S,3S,4'R)-6'-chloro-4'-hydroxy-2'-phenylspiro[chroman-3,3'-thiochroman]-4-one (**8y**) (Table 2, entry 25). The title compound was prepared according the typical procedure, as described above in 93% yield.  $^1\text{H}$  NMR (500 MHz,  $\text{CDCl}_3$ )  $\delta$  = 7.70-7.68 (m, 2H), 7.39-7.37 (m, 2H), 7.21 (dddd,  $J=29.0$ , 27.4, 17.0, 5.0, 3H), 7.06-7.04 (m, 3H), 6.83-6.80 (m, 1H), 6.56 (d,  $J=8.5$ , 1H), 5.54 (d,  $J=6.6$ , 1H), 5.05 (s, 1H), 4.81 (d,  $J=12.3$ , 1H), 4.60 (d,  $J=12.6$ , 1H), 2.78 (d,  $J=6.6$ , 1H);  $^{13}\text{C}$  NMR (125 MHz,  $\text{CDCl}_3$ ):  $\delta$  = 195.03, 160.90, 136.25, 134.88, 134.41, 131.12, 130.83, 129.46, 128.56, 128.01, 127.72, 127.35, 126.68, 126.34, 121.48, 121.02, 117.74, 72.61, 66.56, 51.54, 51.14; HRMS (EI) calcd for  $\text{C}_{23}\text{H}_{17}\text{ClO}_3\text{S}$  408.0587, found 408.0569; HPLC (Chiralpak IC, *i*-propanol/hexane = 10/90, flow rate 1.0 mL/min,  $\lambda$  = 254 nm):  $t_{\text{major}}$  = 5.9 min,  $t_{\text{minor}}$  = 22.2 min,  $ee$  = 92%,  $dr$  = 8.0:1;  $[\alpha]_{\text{D}}^{25}$  (major) = +37.9 ( $c$  = 0.93 in  $\text{CHCl}_3$ ).

### 5. Oxidation of Compound **8a**

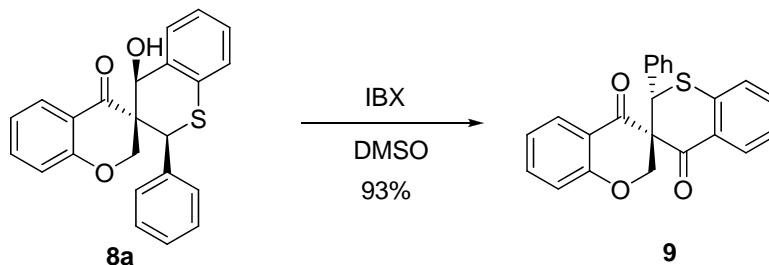

To a solution of **8a** (37.5 mg, 0.1 mmol) in 2 mL DMSO was added 2-Iodoxybenzoic acid (IBX, 84 mg, 0.3 mmol). The mixture was stirred at room temperature for 4h, reaction completed. The mixture was diluted with 10 mL water, extracted with EtOAc (3x 20 mL), the organic layers were combined, dried

and concentrated. The crude product was purified by silica gel chromatography (eluting with 1:6 EtOAc-hexane) to give product **9a** (34.6 mg, 93% yield).  $^1\text{H}$  NMR (500 MHz,  $\text{CDCl}_3$ ):  $\delta$  = 8.11 (dd,  $J$  = 7.9 Hz, 1.3, 1H), 7.90 (dd,  $J$  = 7.9 Hz, 1.9, 1H), 7.52-7.44 (m, 2H), 7.37 (dd,  $J$  = 7.1, 2.4 Hz, 2H), 7.27-7.24 (m, 5H), 7.04 (m, 2H), 5.00-4.97 (m, 2H), 4.44 (d,  $J$  = 12.3 Hz, 1H);  $^{13}\text{C}$  NMR (125 MHz,  $\text{CDCl}_3$ ):  $\delta$  = 192.54, 189.85, 160.74, 140.52, 136.33, 136.18, 133.89, 130.87, 129.24, 128.79, 128.74, 128.59, 128.01, 126.88, 125.30, 122.06, 120.43, 117.62, 69.20, 57.88, 47.57; HRMS (ESI) calcd for  $\text{C}_{23}\text{H}_{16}\text{O}_3\text{SNa}$  ( $\text{M} + \text{Na}^+$ ) 395.0718, found 395.0689; HPLC (Chiralpak IC, *i*-propanol/hexane = 10/90, flow rate 1.0 mL/min,  $\lambda$  = 254 nm):  $t_{\text{major}}$  = 10.8 min,  $t_{\text{minor}}$  = 17.7 min,  $ee$  = 97%,  $dr$  = 8.0:1;  $[\alpha]_D^{25}$  (major) =  $-300.2$  ( $c$  = 1.07 in  $\text{CHCl}_3$ ).

## 6. Preparation of Compound 12 for X-ray Crystallographic analysis

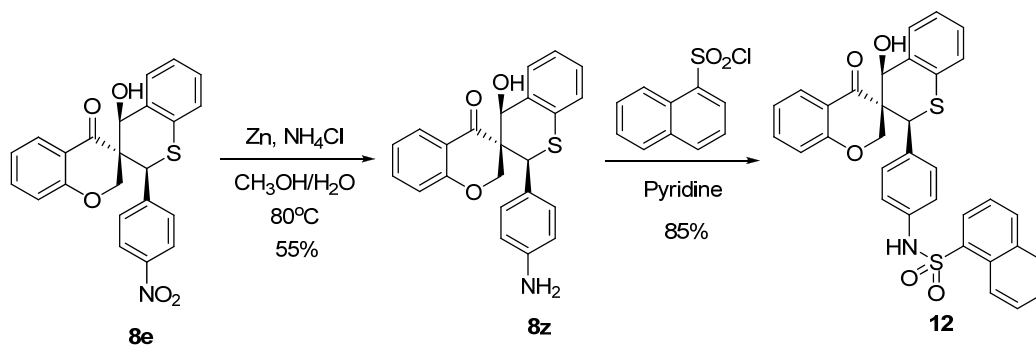

To a stirred mixture of compound **8e** (210 mg, 0.5 mmol) and water (6 mL),  $\text{NH}_4\text{Cl}$  (214 mg, 4 mmol) and zinc metal powder (490 mg, 7.5 mmol) were added at room temperature. After the reaction mixture was stirred for 1 hour at  $80^\circ\text{C}$ , the mixture was extracted with EtOAc (3 x 20 mL). The combined organic layer was dried by  $\text{MgSO}_4$  and concentrated, the resulting residue was purified by silica gel chromatography (eluting with EtOAc/hexane = 1/2) to give intermediate product **8z** (107 mg, 55% yield).<sup>7</sup>

The intermediate product **8z** (98 mg, 0.25 mmol) was dissolved in 2 mL dried pyridine. Then

naphthalene-1-sulfonyl chloride (170 mg, 0.75 mmol) was added into the mixture. The reaction mixture was stirred at room temperature overnight. After that, 10 mL 1.0 M HCl solution was added and the resulting mixture was extracted with EtOAc (3 x 20 mL). The combined organic layer was dried by MgSO<sub>4</sub> and concentrated, the resulting residue was purified by silica gel chromatography (eluting with EtOAc/Hexane = 1/3) to give product **12** (123 mg, 85% yield). <sup>1</sup>H NMR (500 MHz, CDCl<sub>3</sub>): δ = 8.57 (d, *J* = 8.5 Hz, 1H), 8.08 (dd, *J* = 7.6, 0.9 Hz, 1H), 8.03 (d, *J* = 8.2 Hz, 1H), 7.93 (d, *J* = 7.6 Hz, 1H), 7.65-7.58 (m, 4H), 7.42 (t, *J* = 7.7 Hz, 1H), 7.18-7.13 (m, 5H), 7.05-7.01 (m, 1H), 6.72-6.68 (m, 2H), 6.62 (d, *J* = 8.5 Hz, 2H), 6.40 (d, *J* = 8.5 Hz, 1H), 5.47 (d, *J* = 6.6 Hz, 1H), 4.93 (s, 1H), 4.67 (d, *J* = 12.6 Hz, 1H), 4.52 (d, *J* = 12.6 Hz, 1H), 2.67 (d, *J* = 6.9 Hz, 1H); <sup>13</sup>C NMR (125 MHz, CDCl<sub>3</sub>): δ = 195.12, 160.74, 136.29, 136.10, 134.68, 134.16, 133.88, 133.07, 132.25, 131.68, 130.43, 130.34, 129.23, 128.56, 128.04, 127.85, 127.08, 126.97, 126.55, 125.10, 125.01, 124.07, 124.01, 121.45, 120.98, 119.93, 117.58, 72.86, 66.69, 51.34, 50.59; HRMS (ESI) calcd for C<sub>33</sub>H<sub>24</sub>NO<sub>5</sub>S<sub>2</sub> (M - H<sup>+</sup>) 578.1096, found 578.1110.

### 7. Preparation of the compound **11**

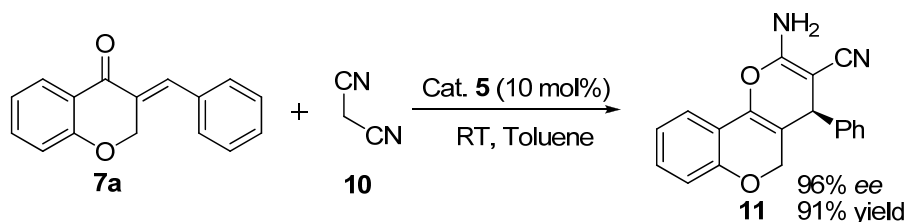

To a solution of malononitrile **10** (10mg, 0.15mmol, 1.5equiv.) in 0.5mL toluene was added (E)-3-benzylidenechroman-4-one **7a** (24mg, 0.1mmol, 1equiv.) at room temperature, followed by adding catalyst IV (4.88mg, 0.01mmol, 0.1equiv.). The mixture was stirred at room temperature. Upon completion, the crude product was purified by column chromatography on silica gel, eluted by

hexane/EtOAc=8:1 then 4:1 to afford the desired product **11** (27.4 mg, 91% yield) as primrose yellow solid. <sup>1</sup>H NMR (500 MHz, CDCl<sub>3</sub>): δ = 7.39 – 7.32 (m, 3H), 7.27 (q, *J* = 6.0 Hz, 3H), 7.23 – 7.15 (m, 1H), 6.95 (t, *J* = 7.5 Hz, 1H), 6.79 (d, *J* = 8.1 Hz, 1H), 4.64 (s, 2H), 4.63 (d, *J* = 13.2 Hz, 1H), 4.43 (d, *J* = 13.8 Hz, 1H), 4.03 (s, 1H); <sup>13</sup>C NMR (125 MHz, CDCl<sub>3</sub>): δ = 158.77, 154.12, 140.87, 138.01, 130.30, 129.02, 127.92, 127.88, 121.26, 121.04, 119.26, 116.66, 115.94, 105.05, 66.48, 61.16, 39.71; HRMS (EI) calcd for C<sub>19</sub>H<sub>14</sub>O<sub>2</sub>N<sub>2</sub> 302.1055, found 302.1048; HPLC (Chiralpak IC, *i*-propanol/hexane = 10/90, flow rate 1.0 mL/min, λ = 254 nm): t<sub>major</sub> = 15.7 min, t<sub>minor</sub> = 27.0 min, *ee* = 96%, [α]<sub>D</sub><sup>30</sup> (major) = -64.1 (*c* = 0.98 in CHCl<sub>3</sub>).

**Reference:**

1. Abdur-Rashid, K.; Guo, R.; Chen, X.; Jia, W. Application: **WO 2008148202 A1**.
2. Vakulya, B.; Varga, S.; Csampai, A.; Soos, T. *Org. Lett.* **2005**, *7*, 1967-1969.
3. Mitchell, J. M.; Finney, N. S. *Tetrahedron Lett.* **2000**, *41*, 8431-8434.
4. Soh, J. Y.-T.; Tan, C.-H. *J. Am. Chem. Soc.* **2009**, *131*, 6904-6905.
5. Govindaraju, T.; Kumar, V. A.; Ganesh, K. N. *J. Org. Chem.* **2004**, *69*, 5725-5734.
6. Frigerio, M.; Santagostino, M.; Sputore, S.; Palmisano, G. *J. Org. Chem.* **1995**, *60*, 7272-6.
7. Tsukinoki, T.; Tsuzuki, H. *Green Chem.* **2001**, *3*, 37-38.

Compound **b**

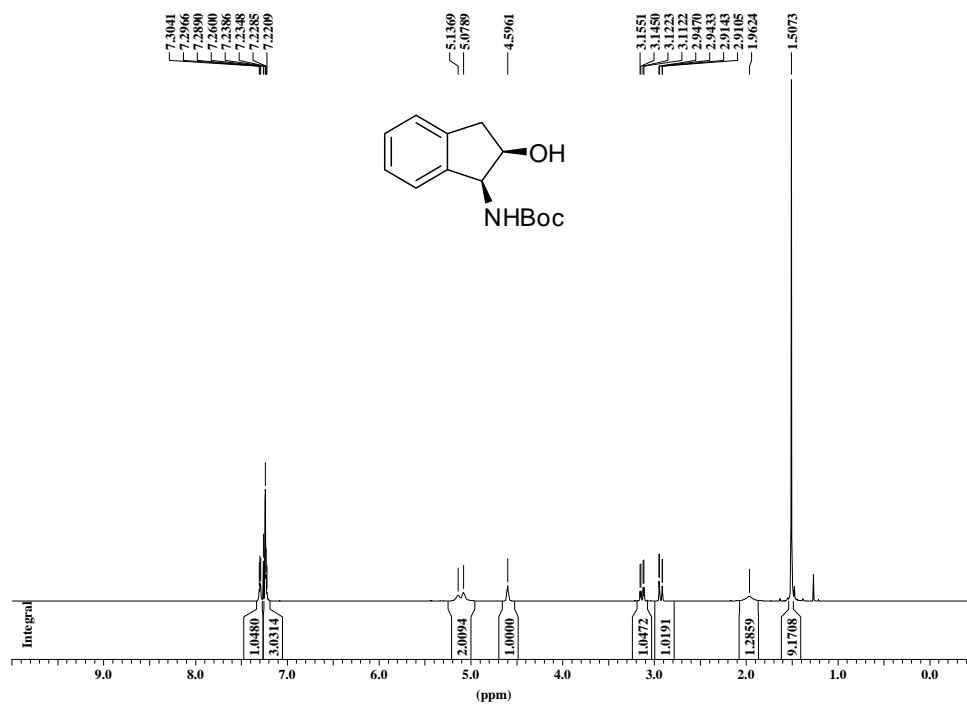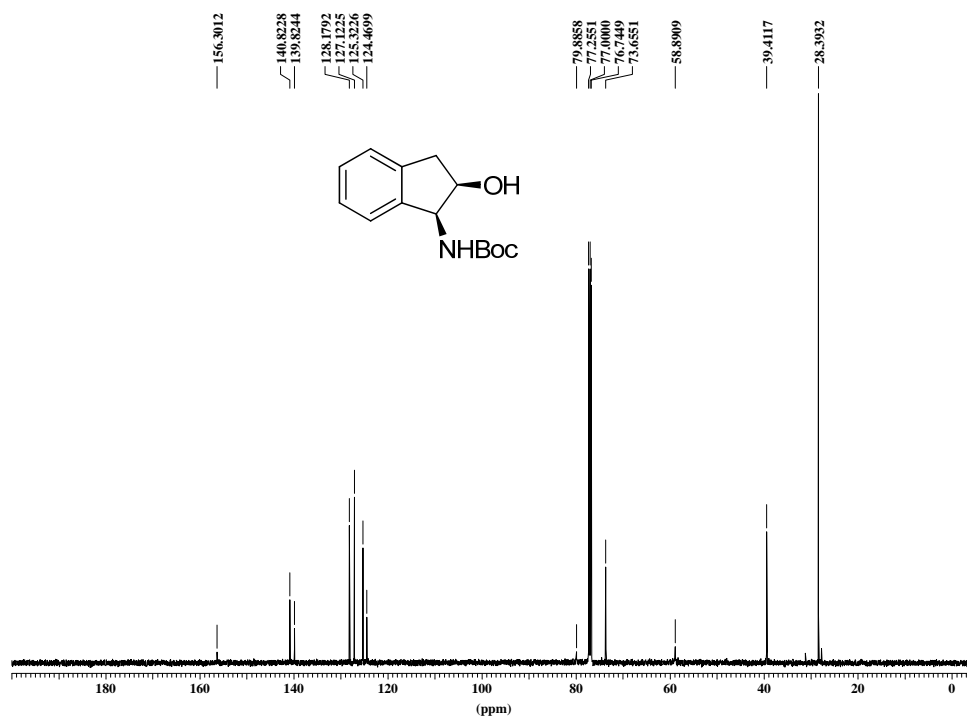

Compound **c**

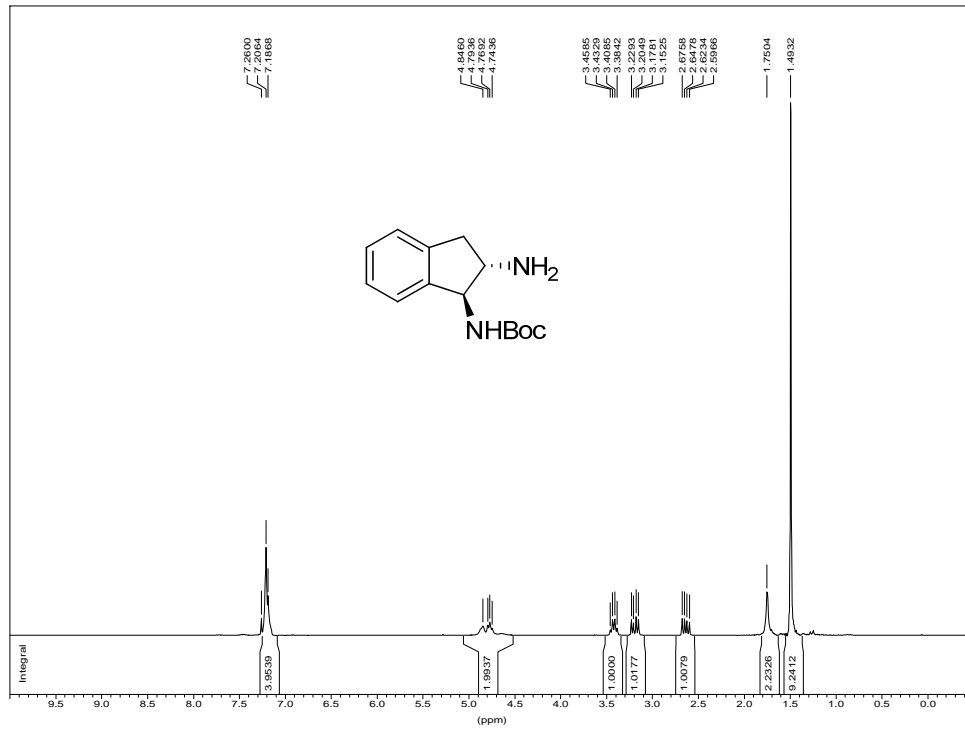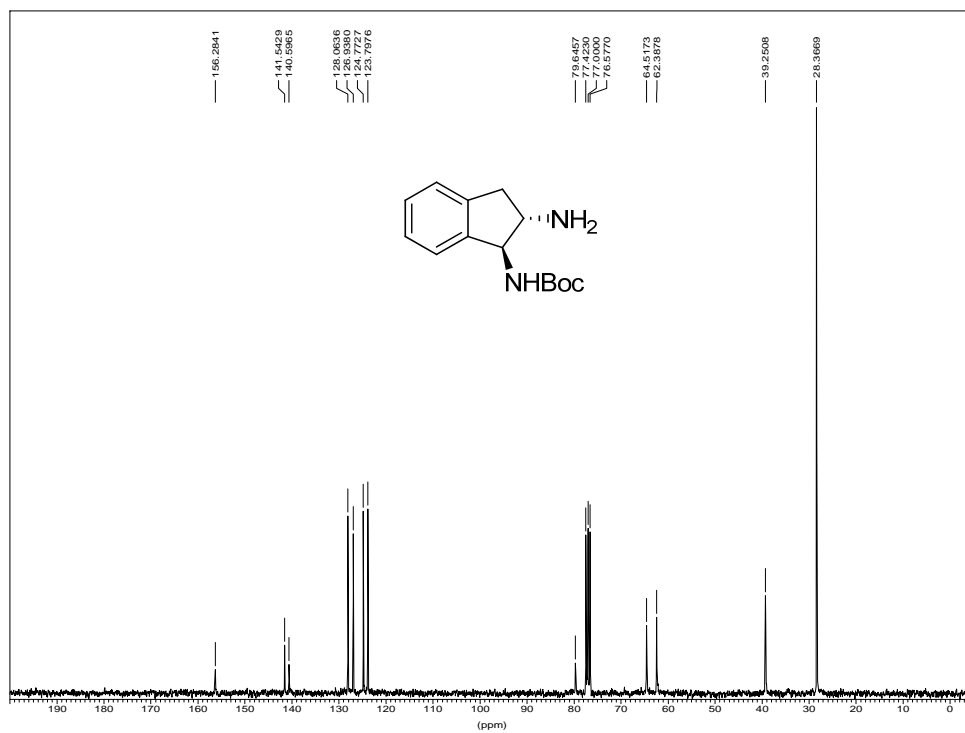

Compound **d**

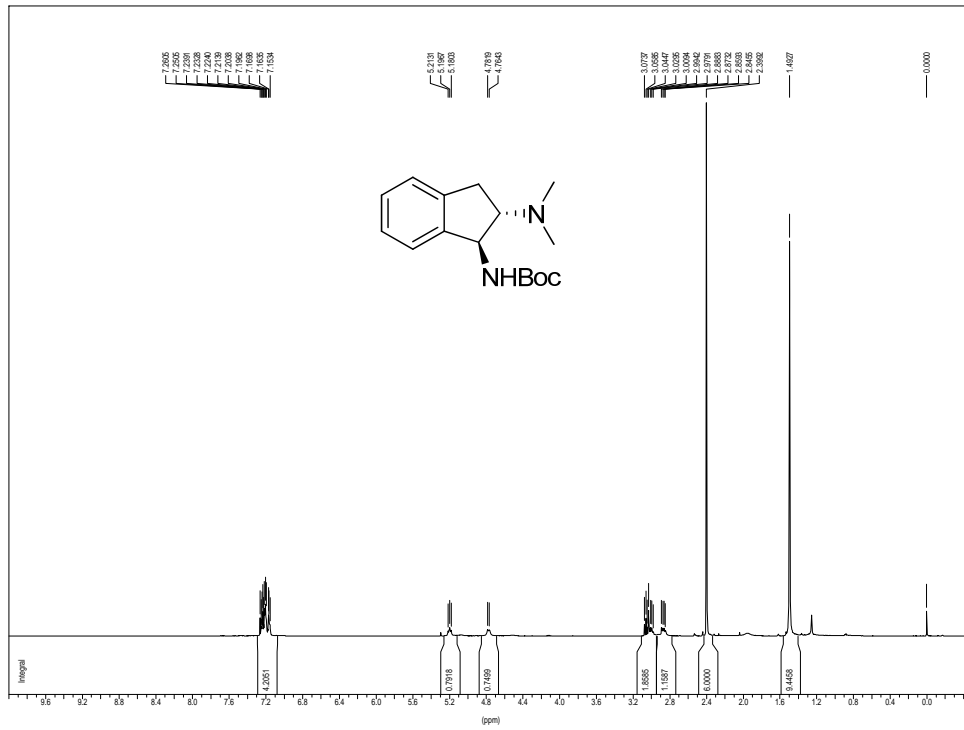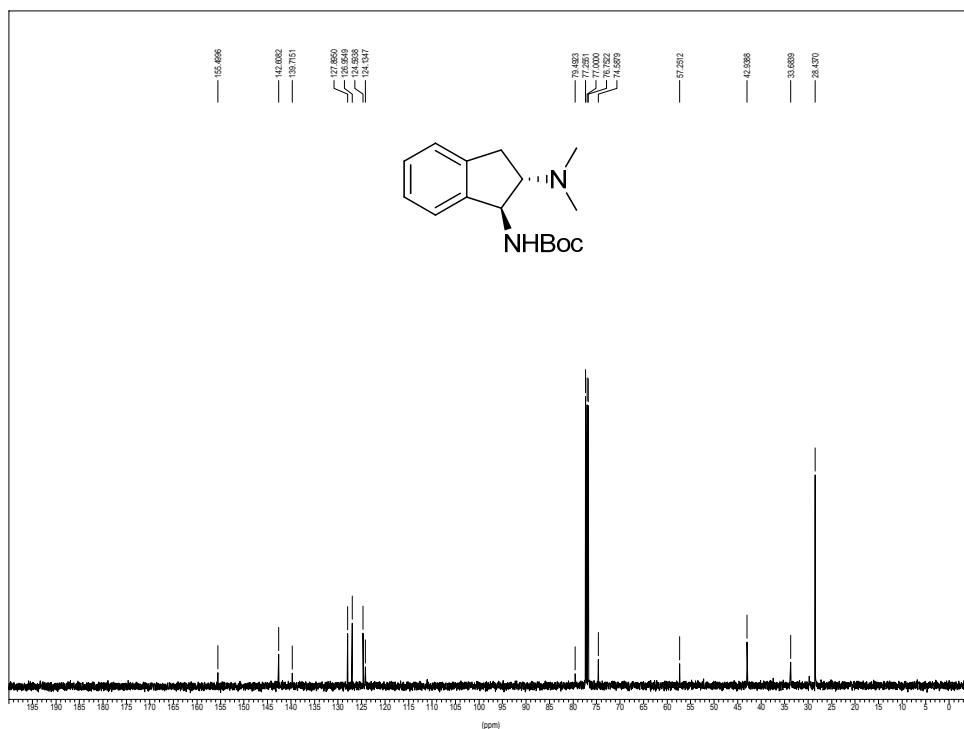



Compound **g**

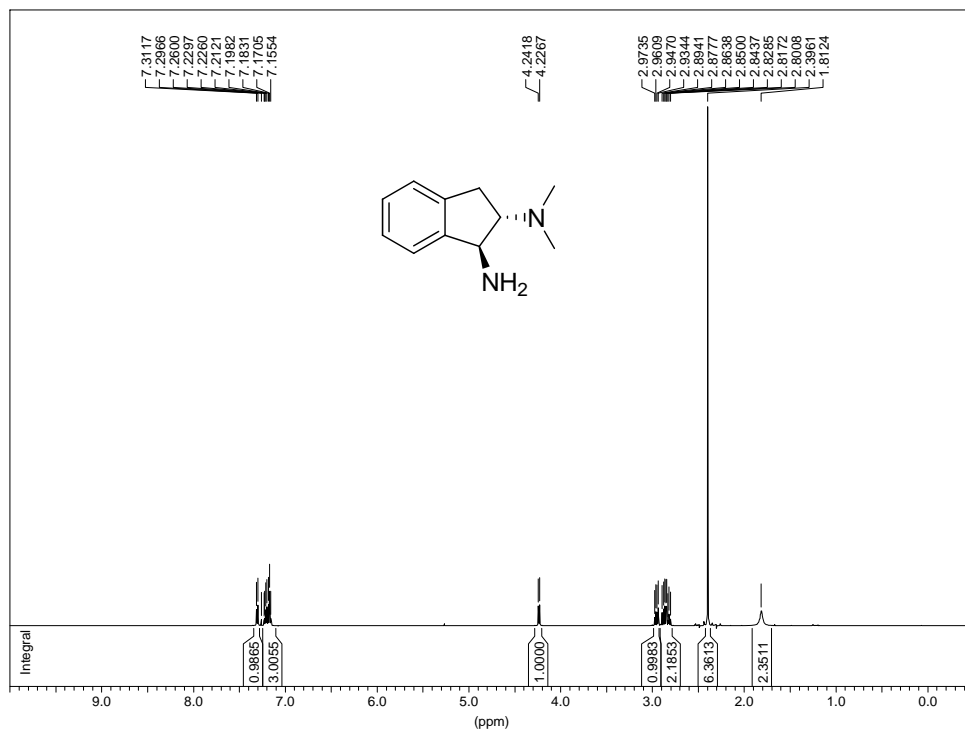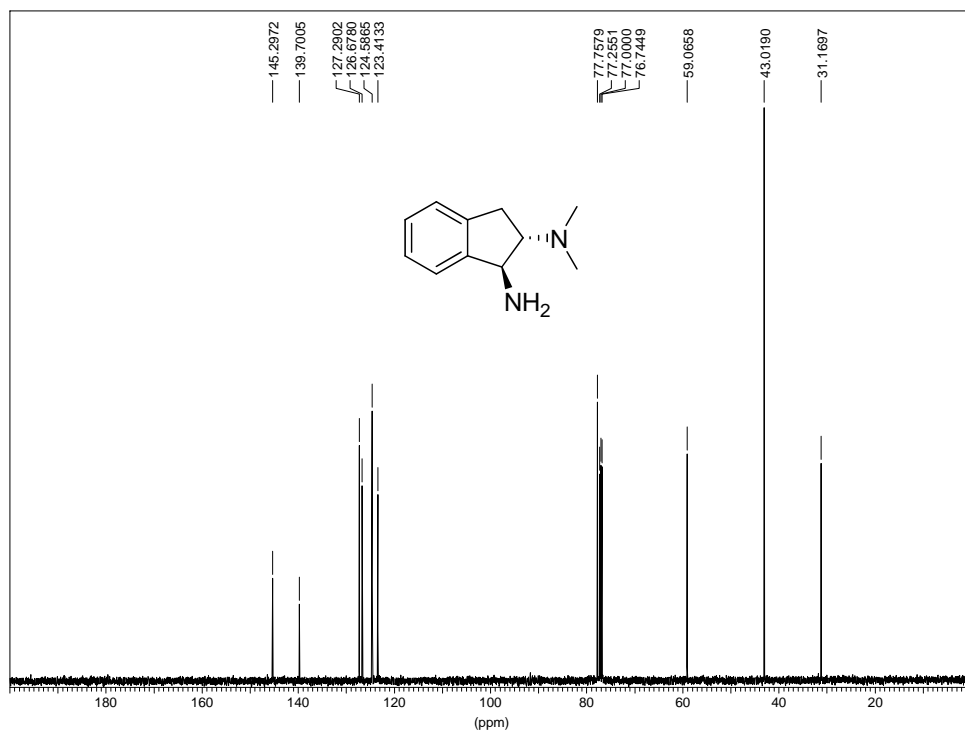

Compound **3a**

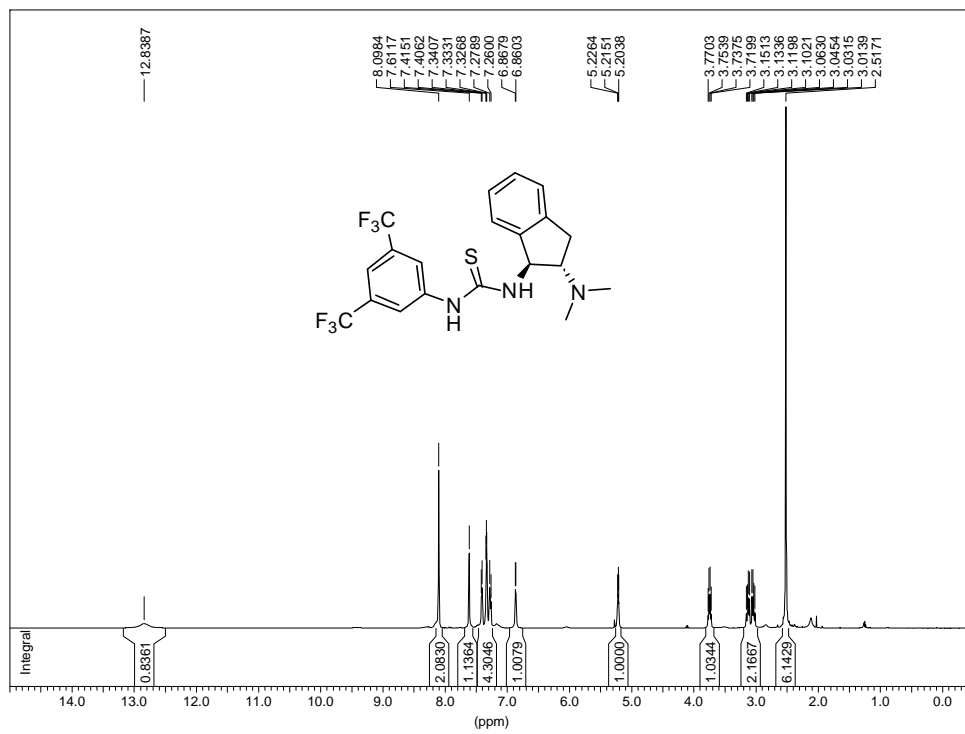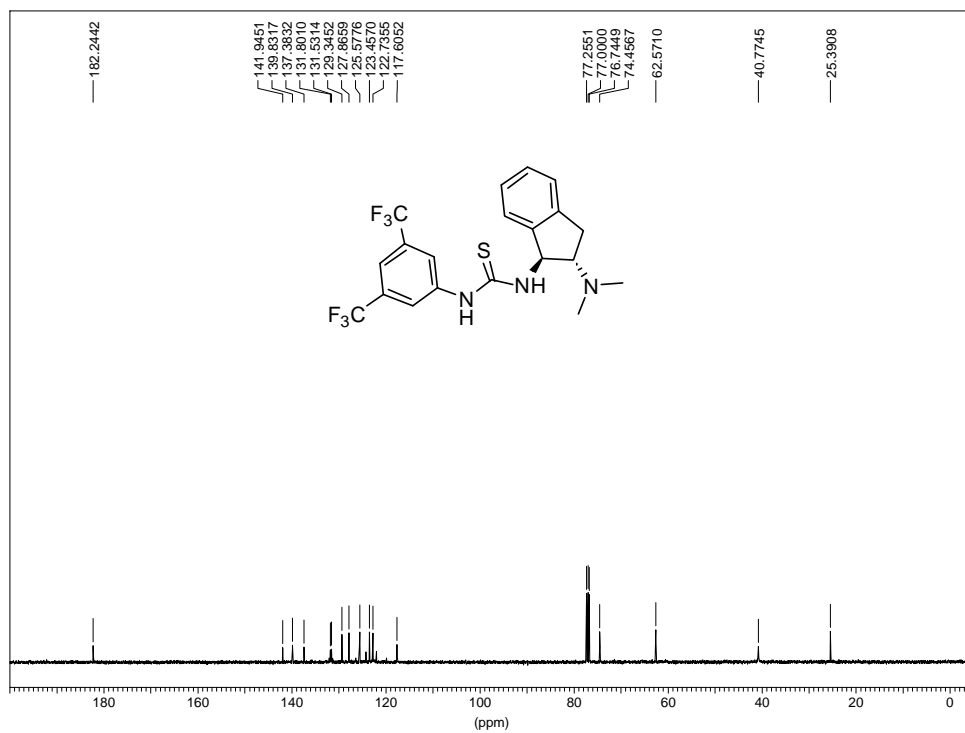

Compound e

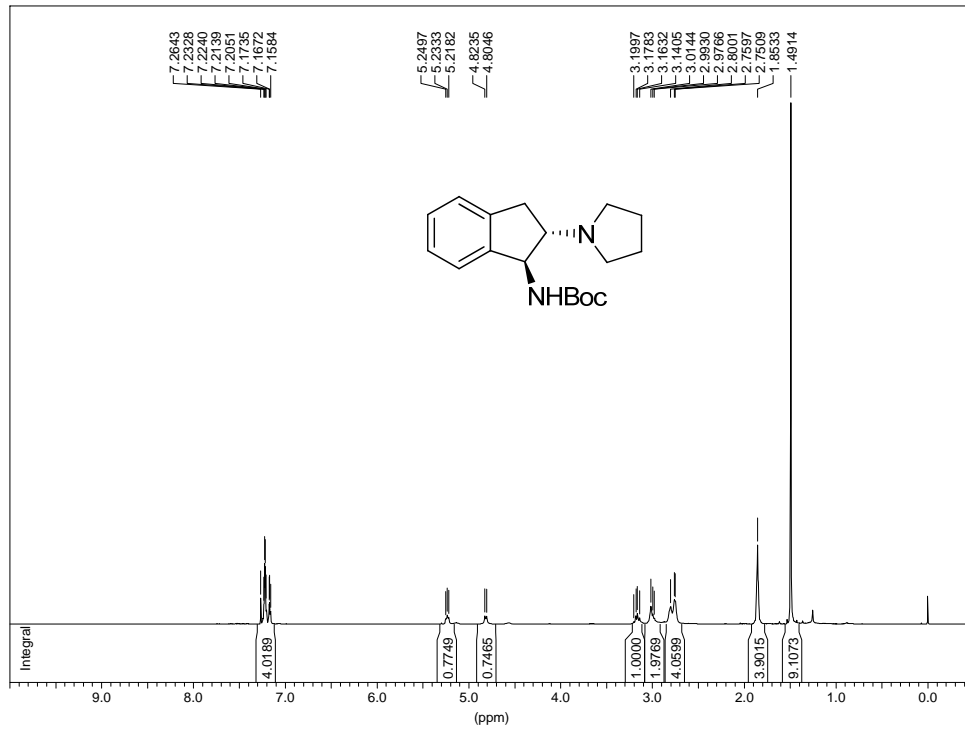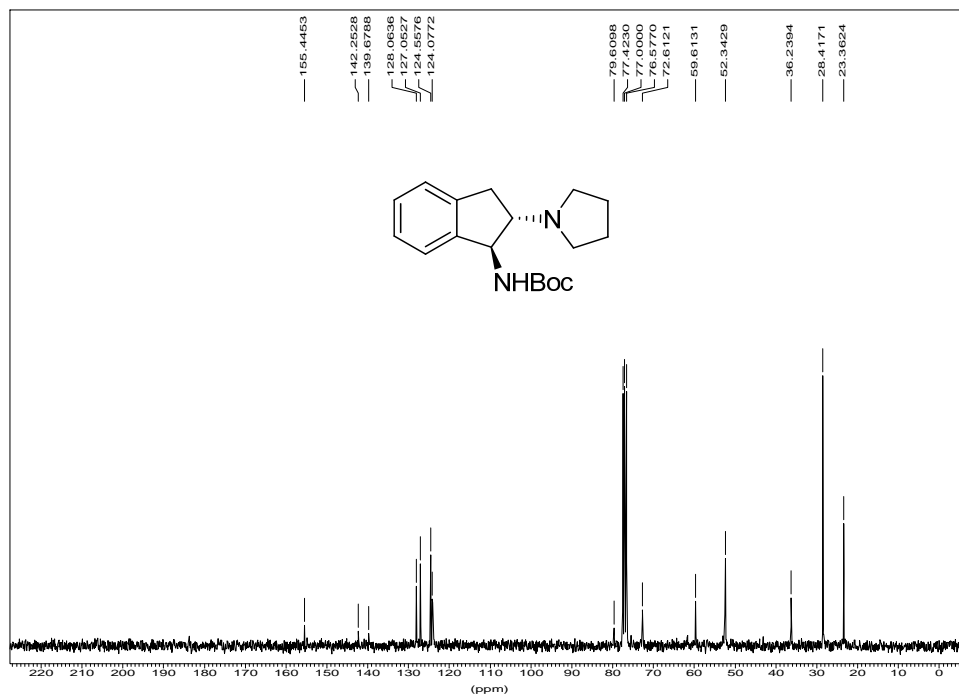

Compound **h**

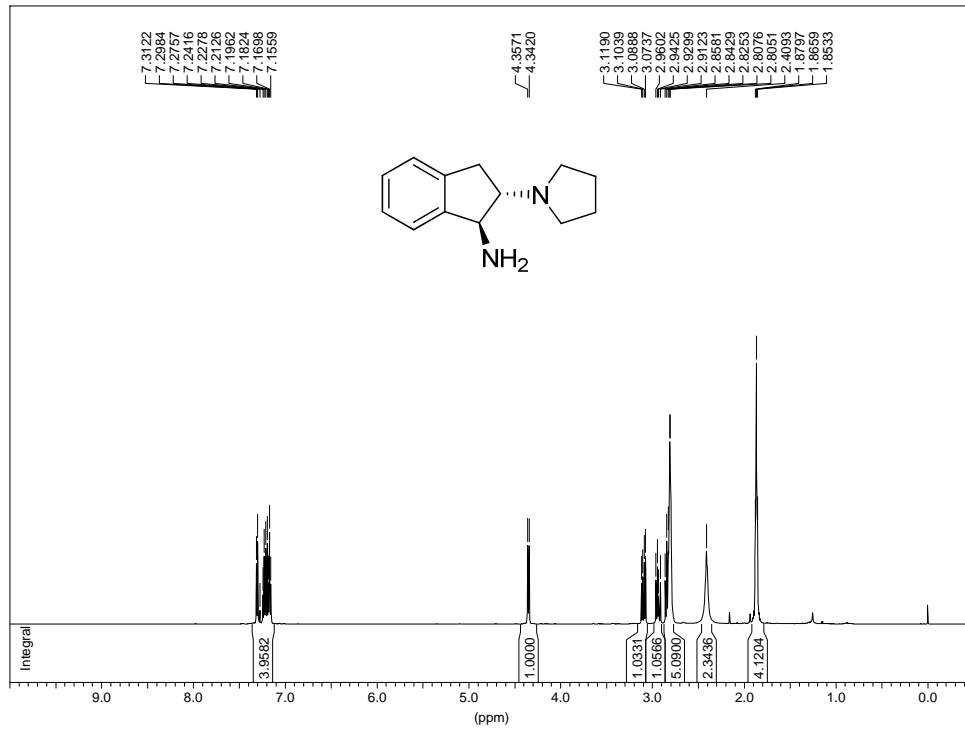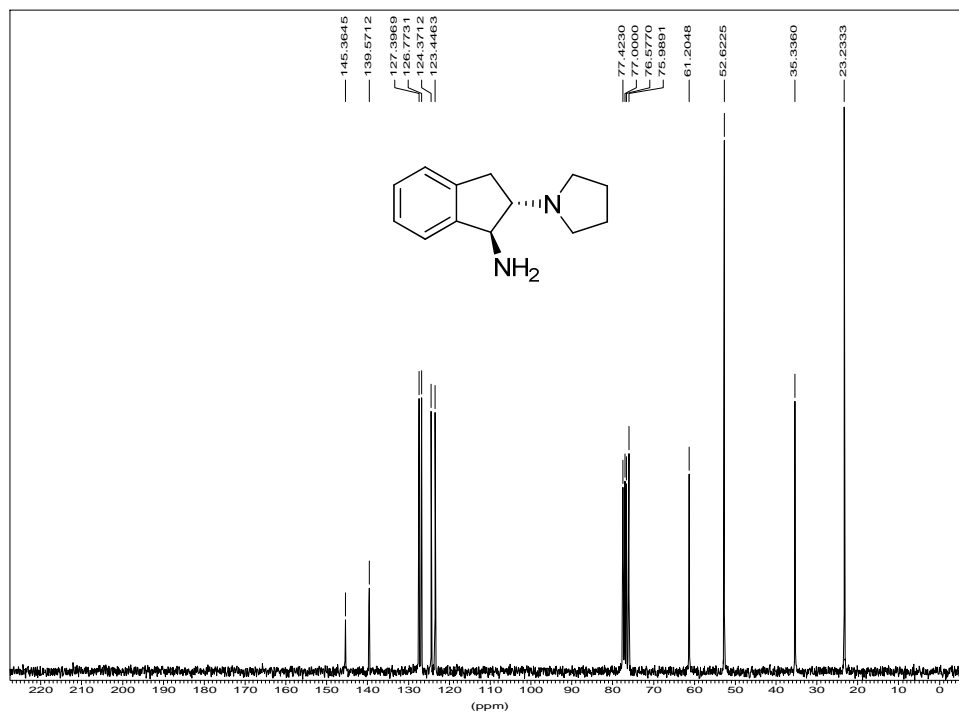

Compound **3b**

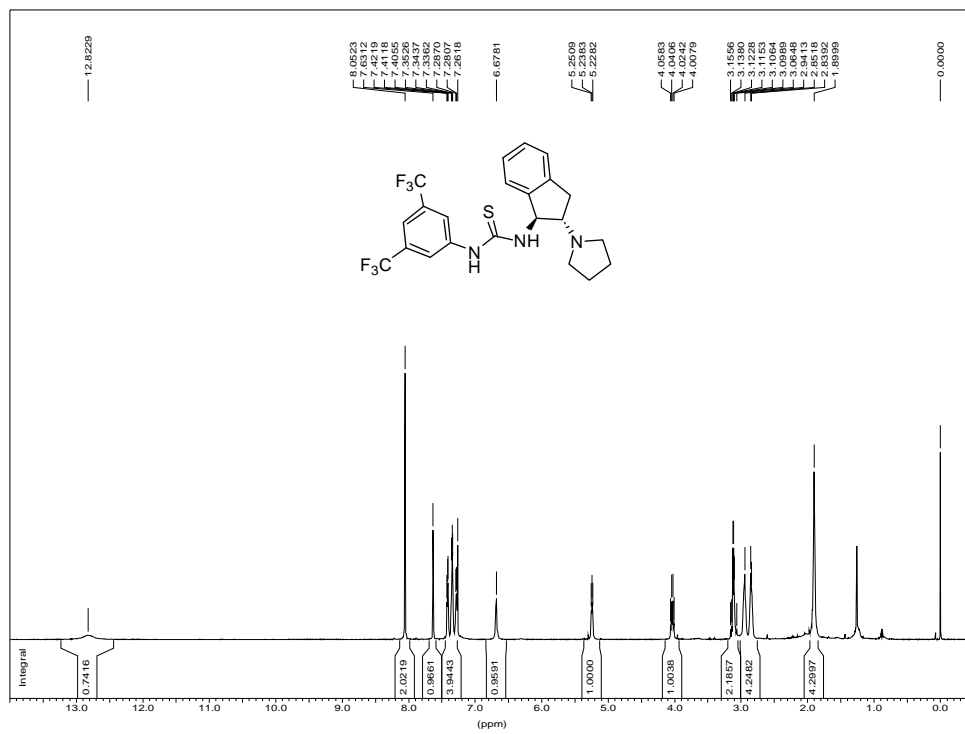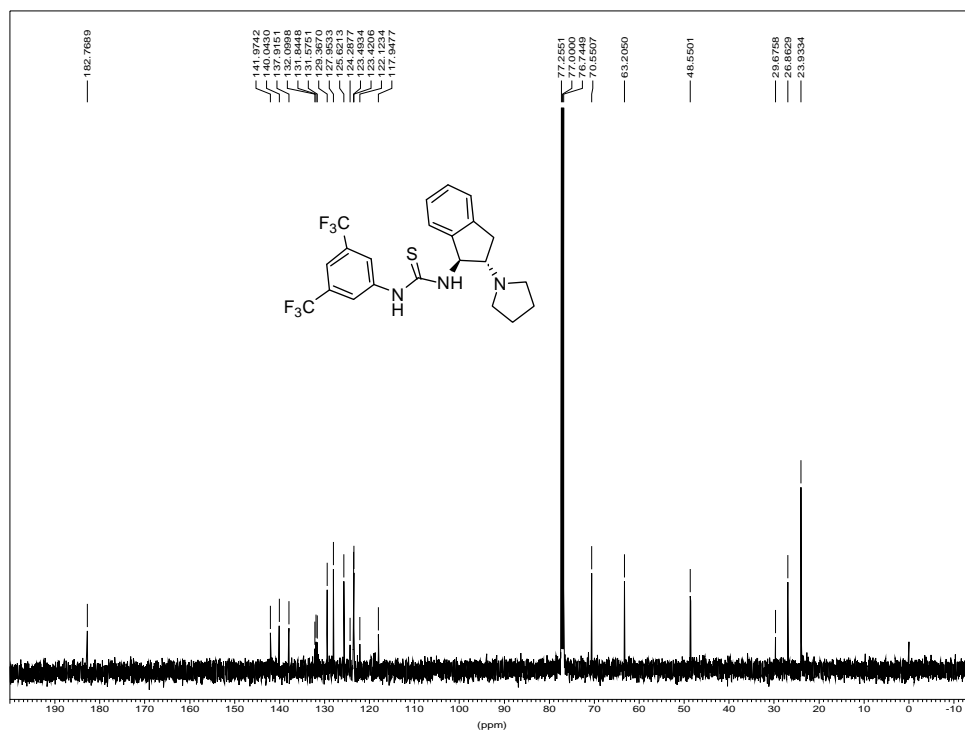

Compound **f**

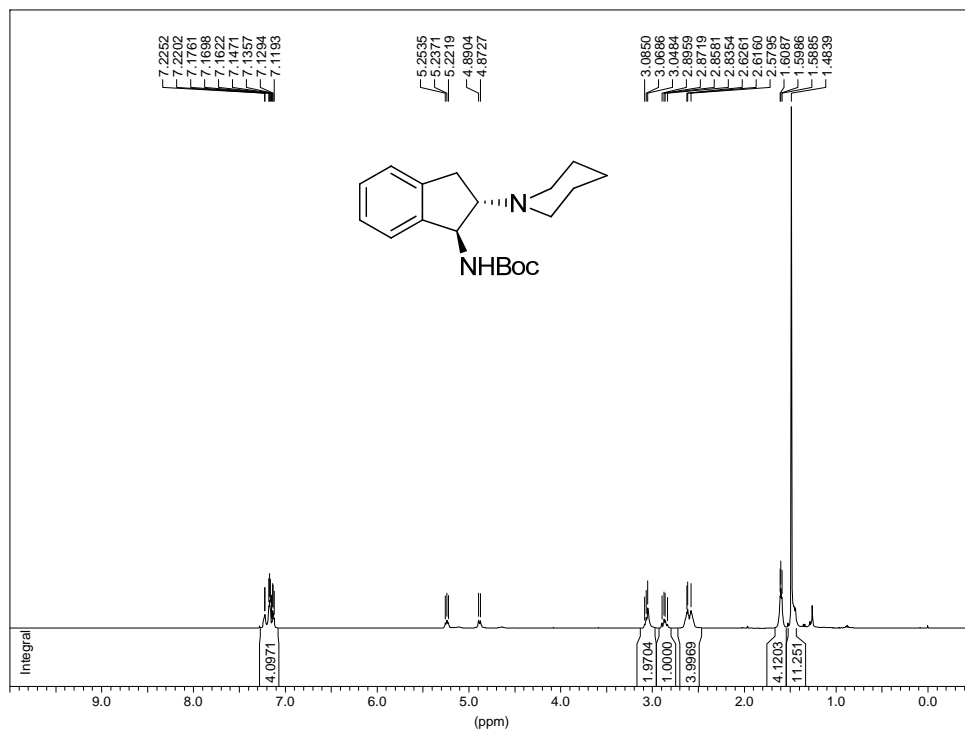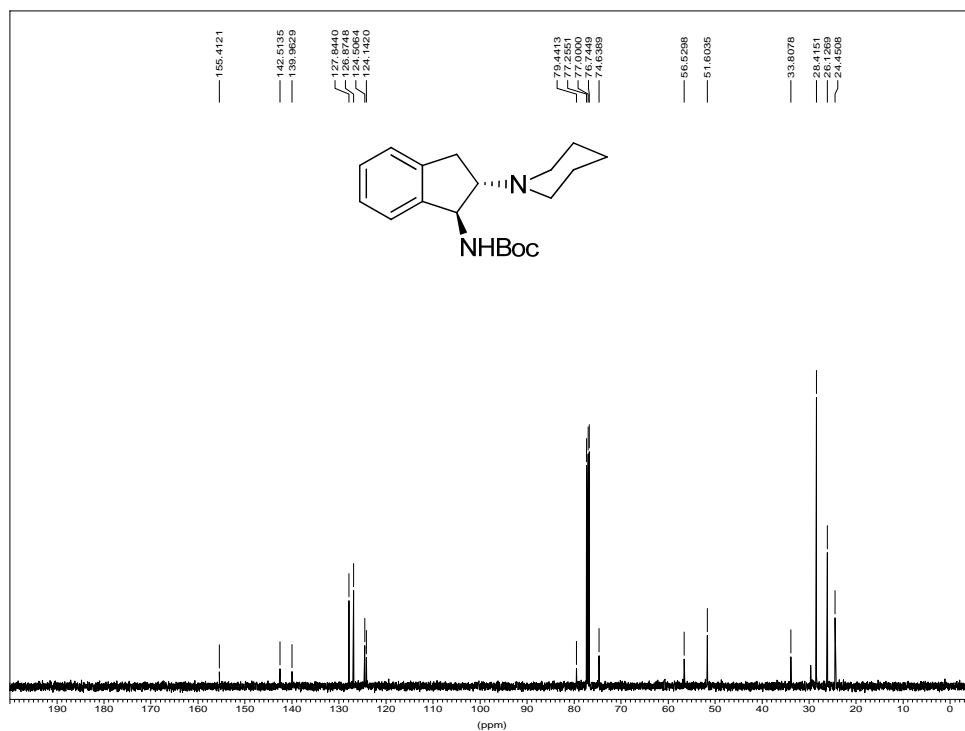

Compound **i**

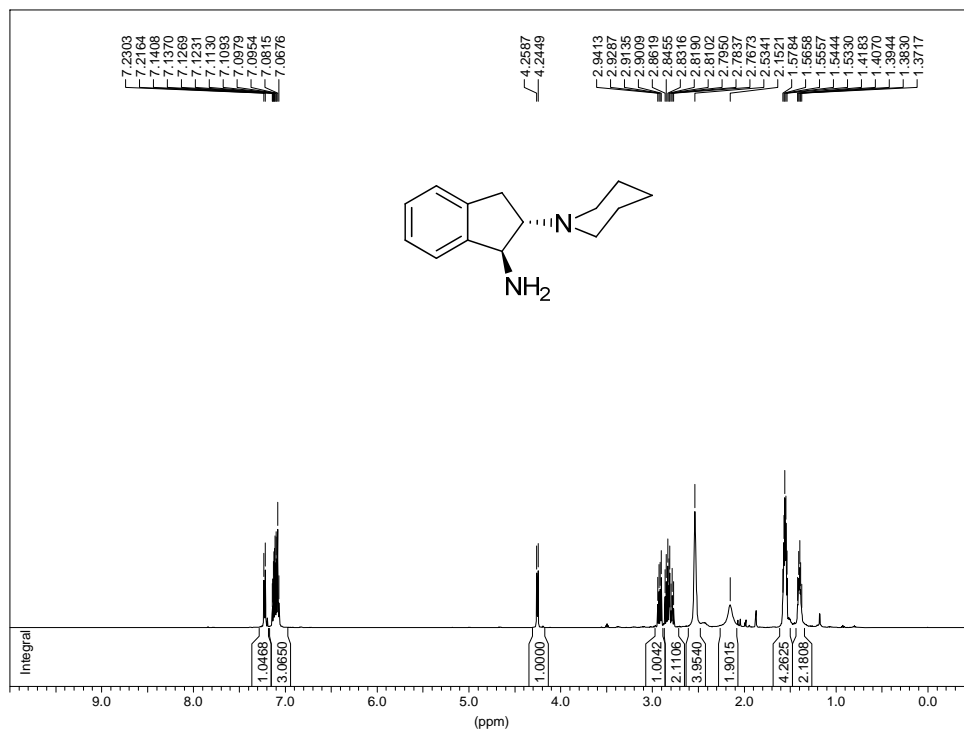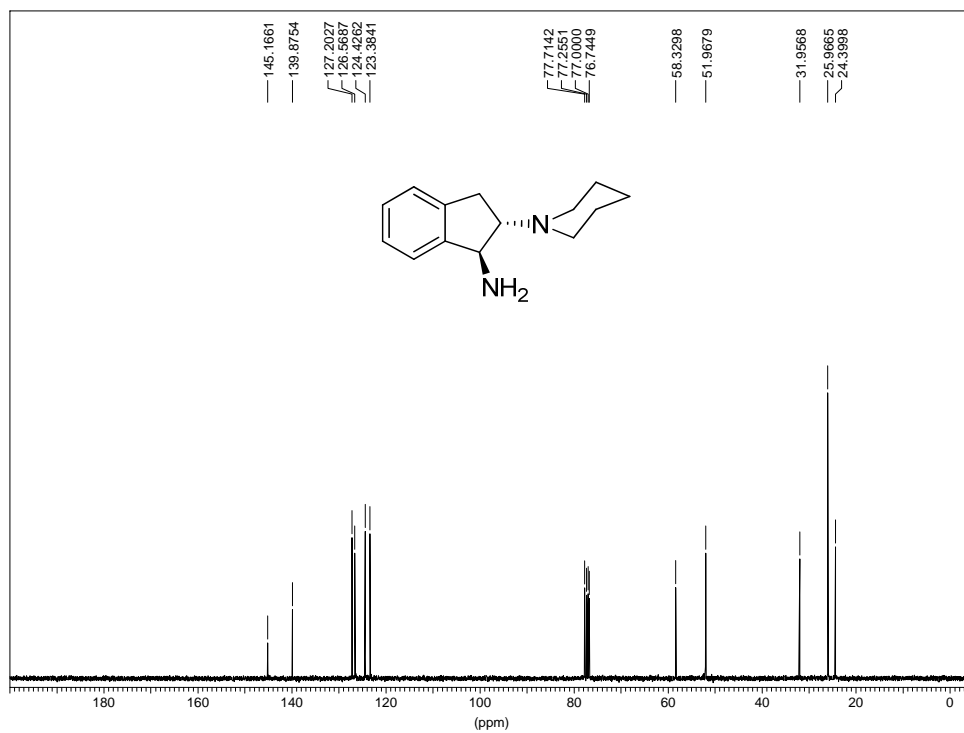

Compound **3c**

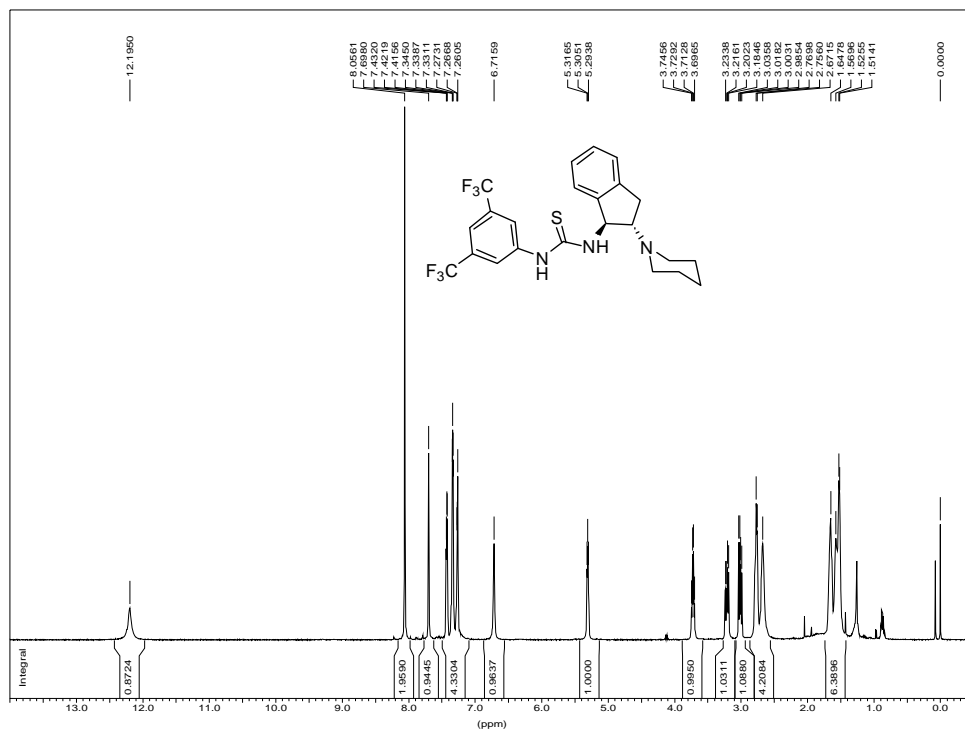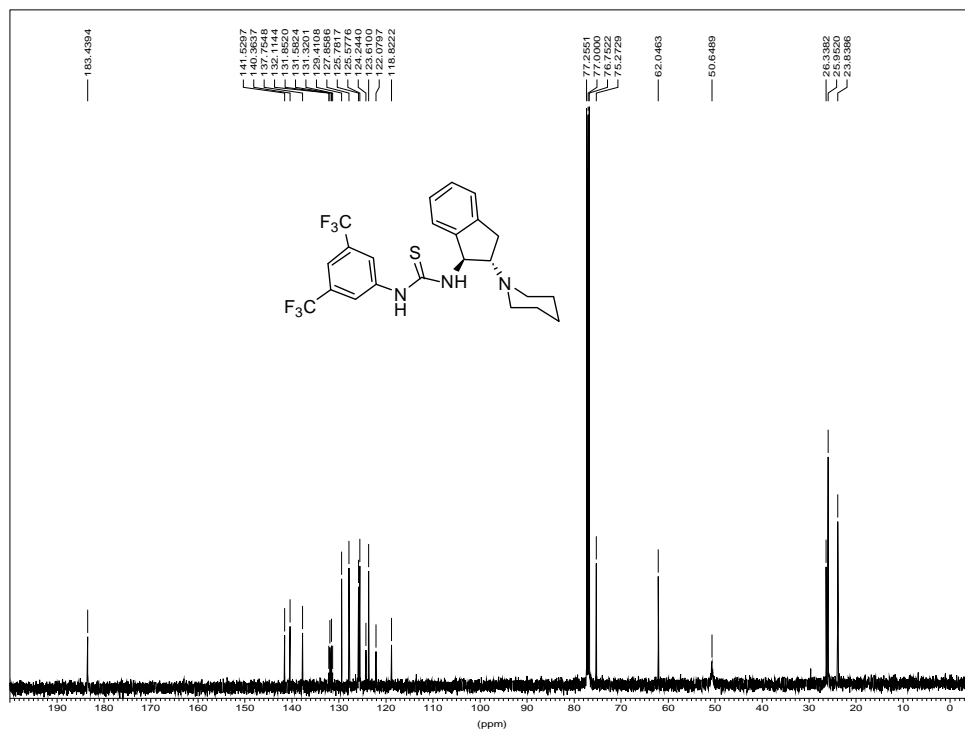



Compound **k**

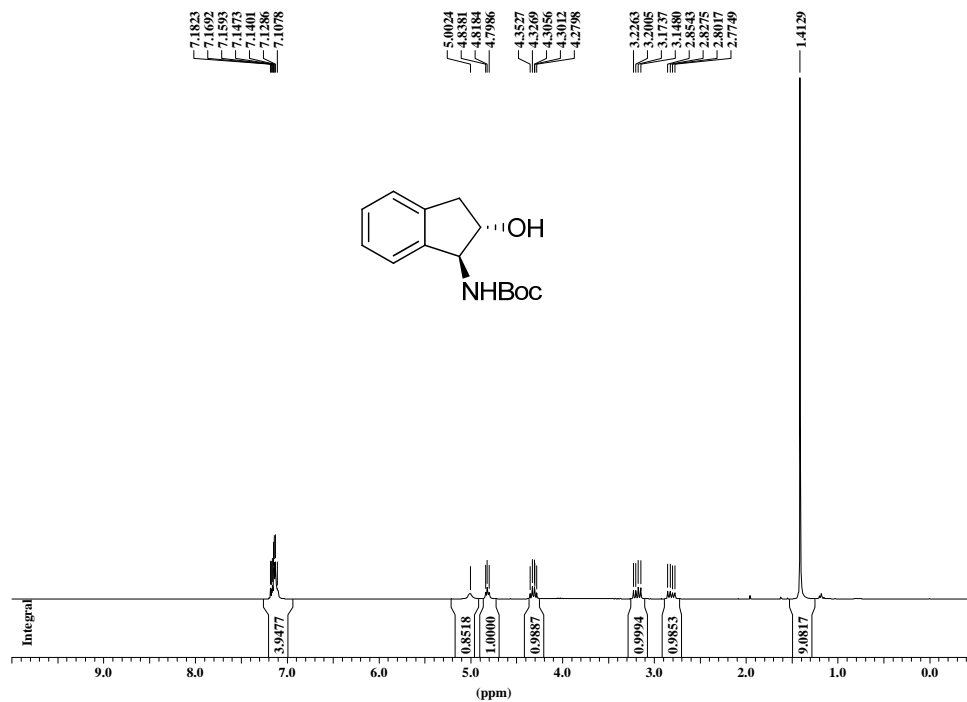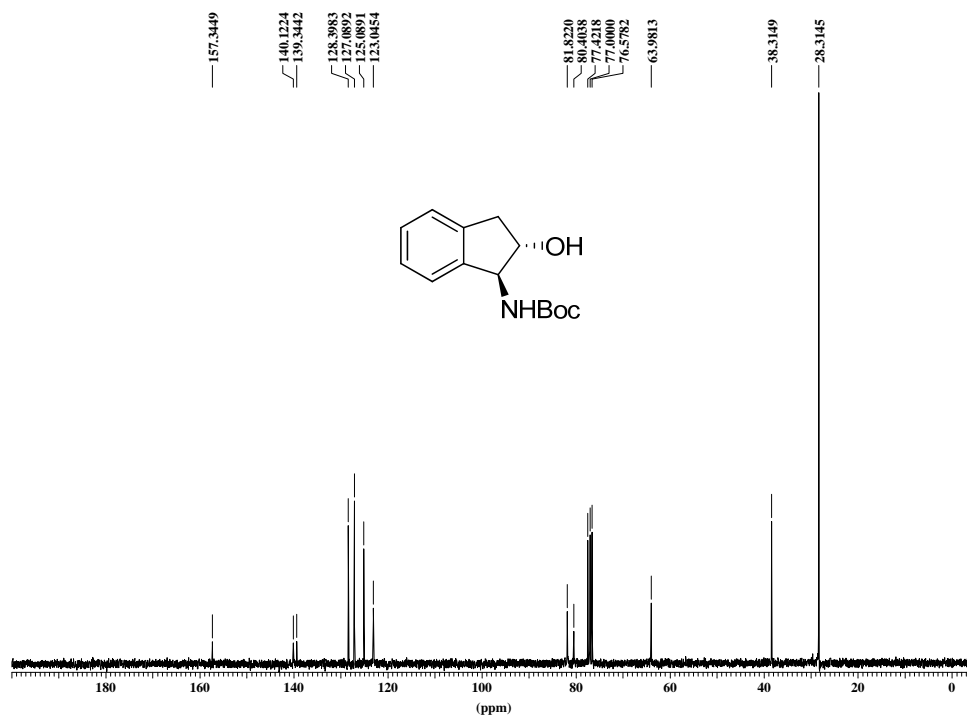

Compound I

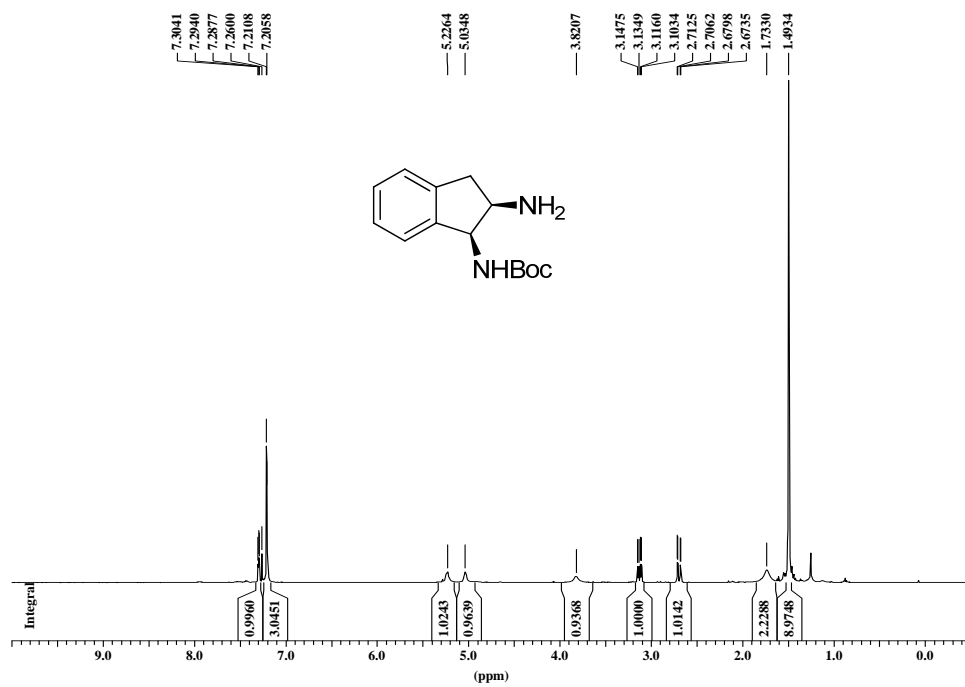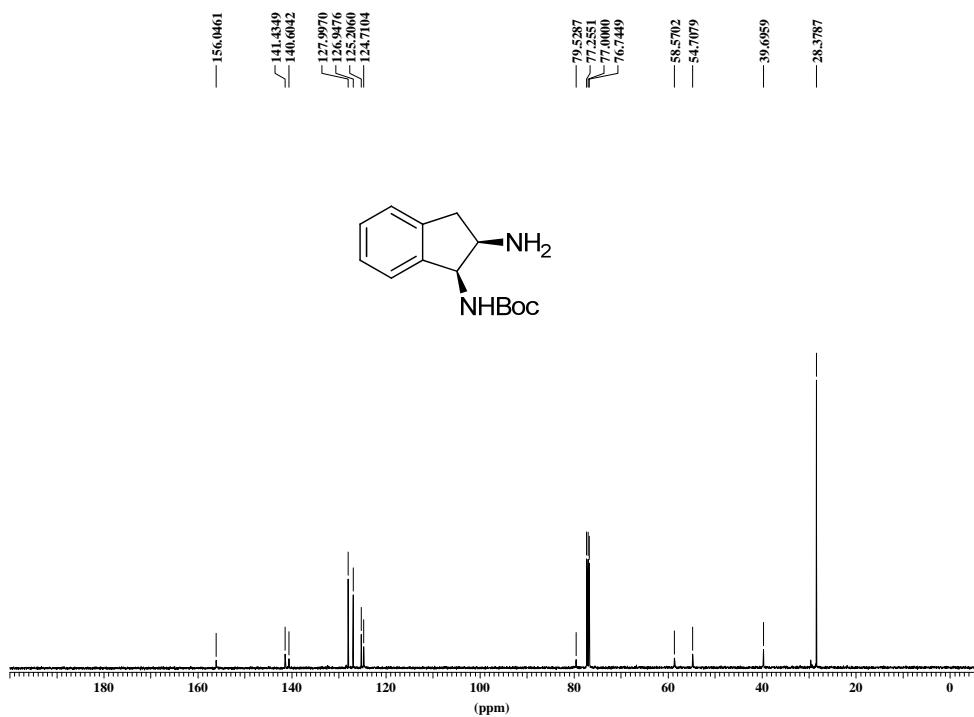

Compound **m**

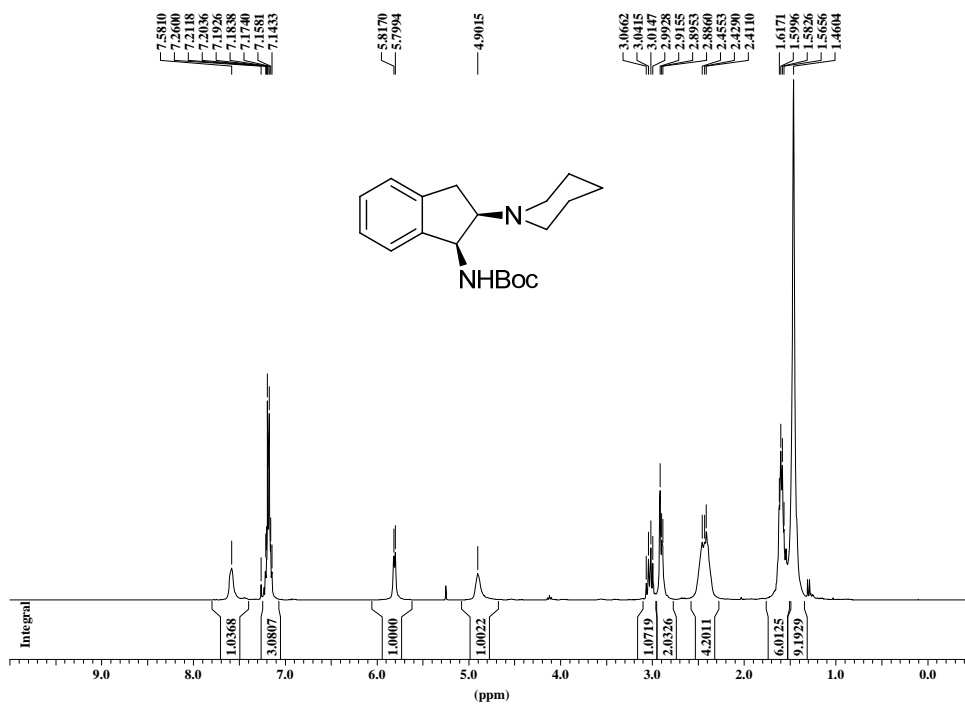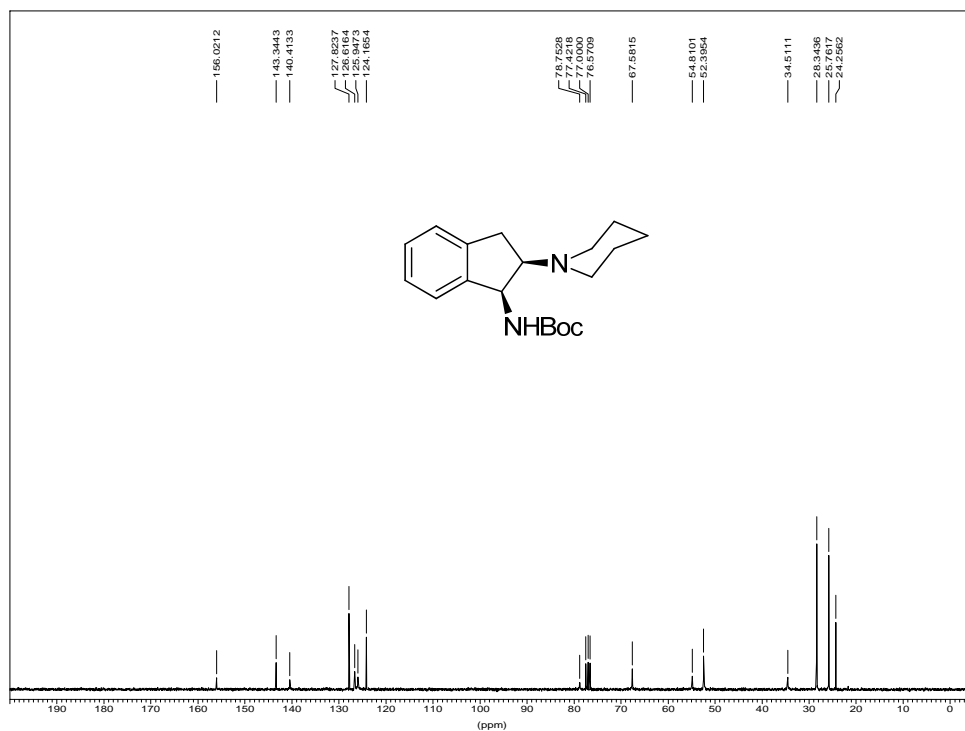

Compound **n**

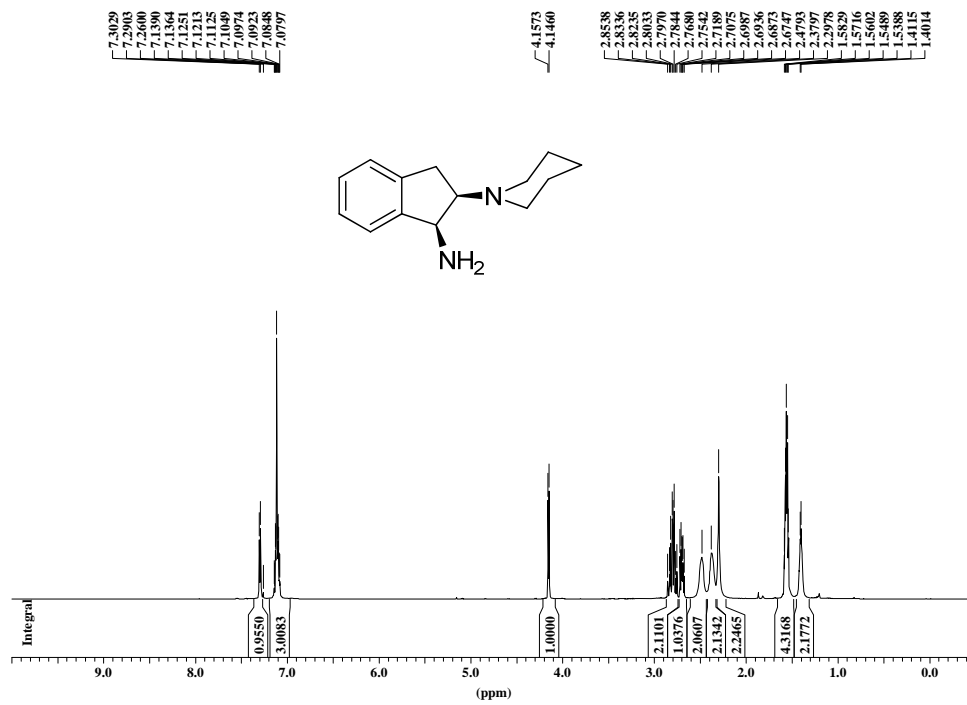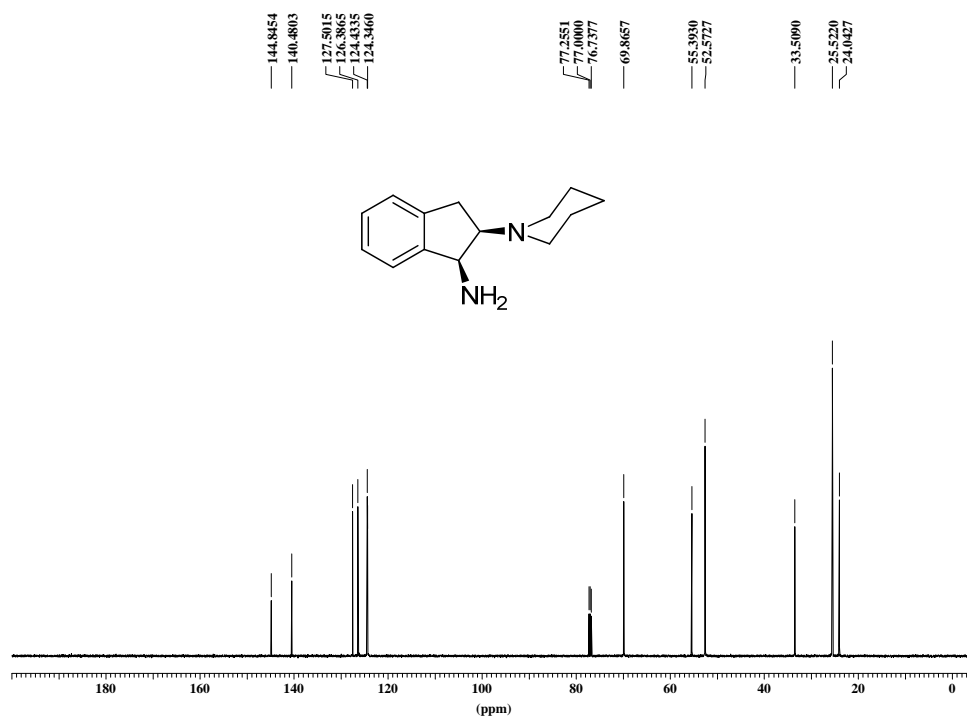

Compound 5

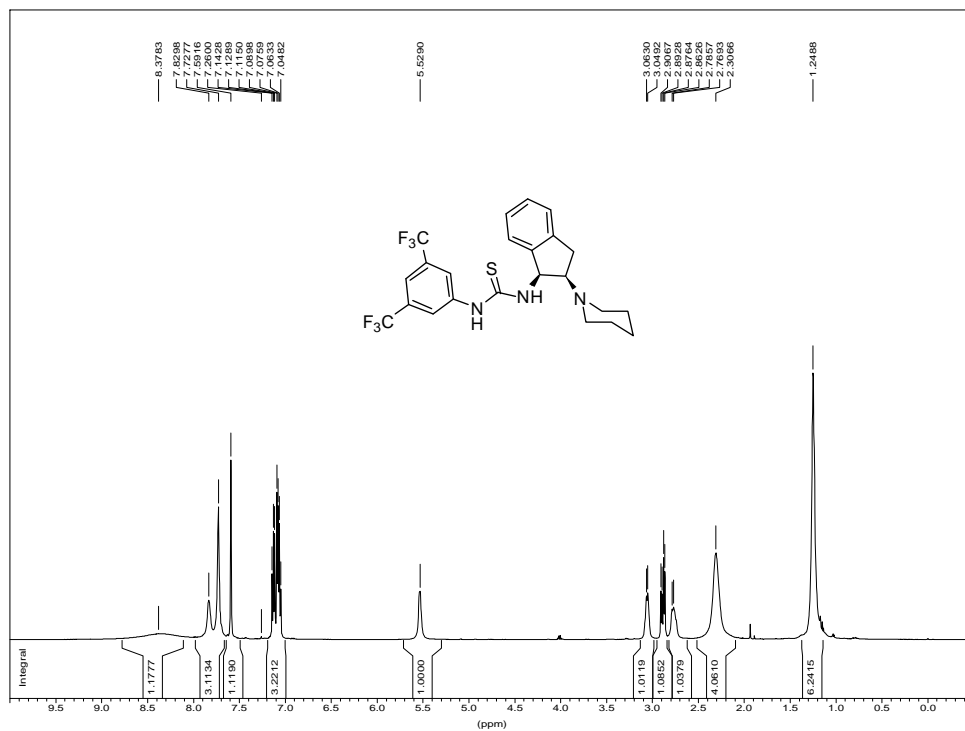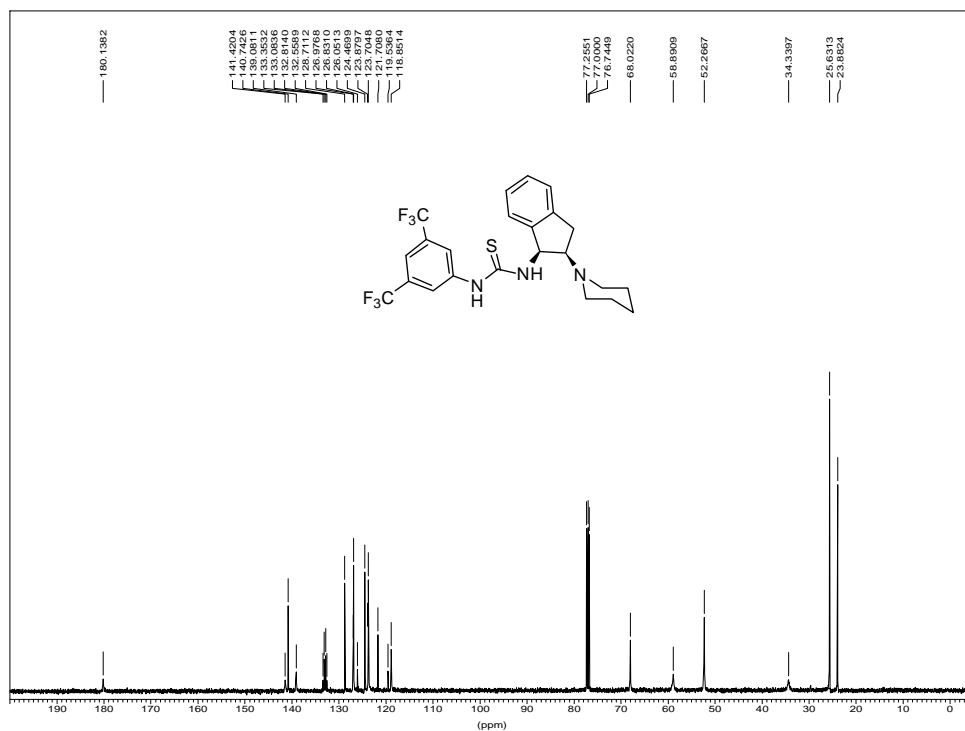

Compound **o**

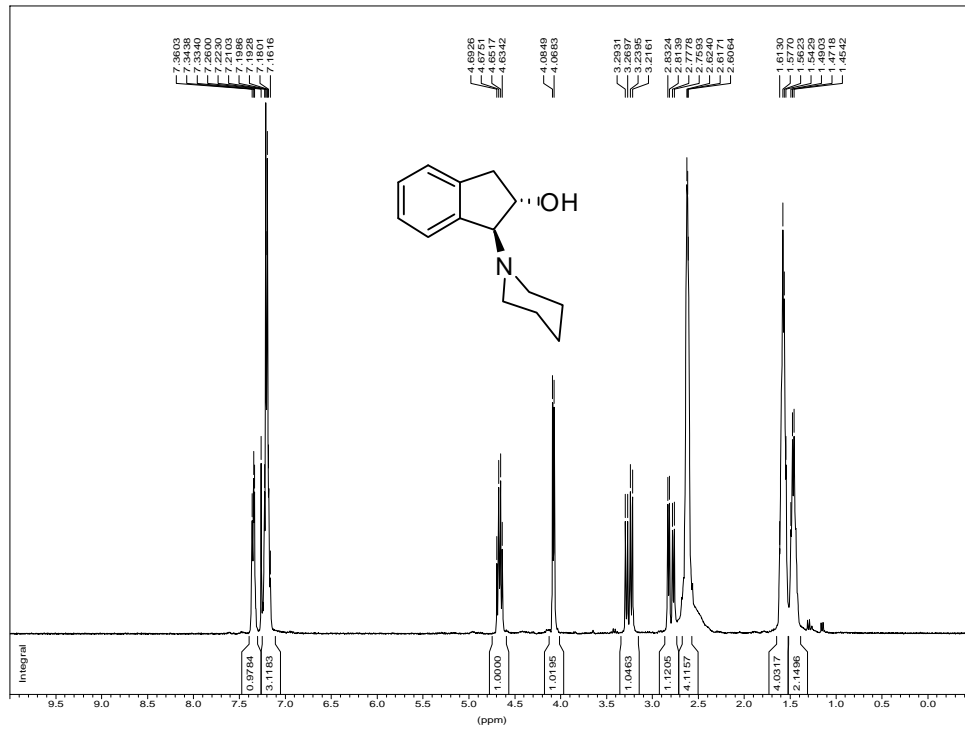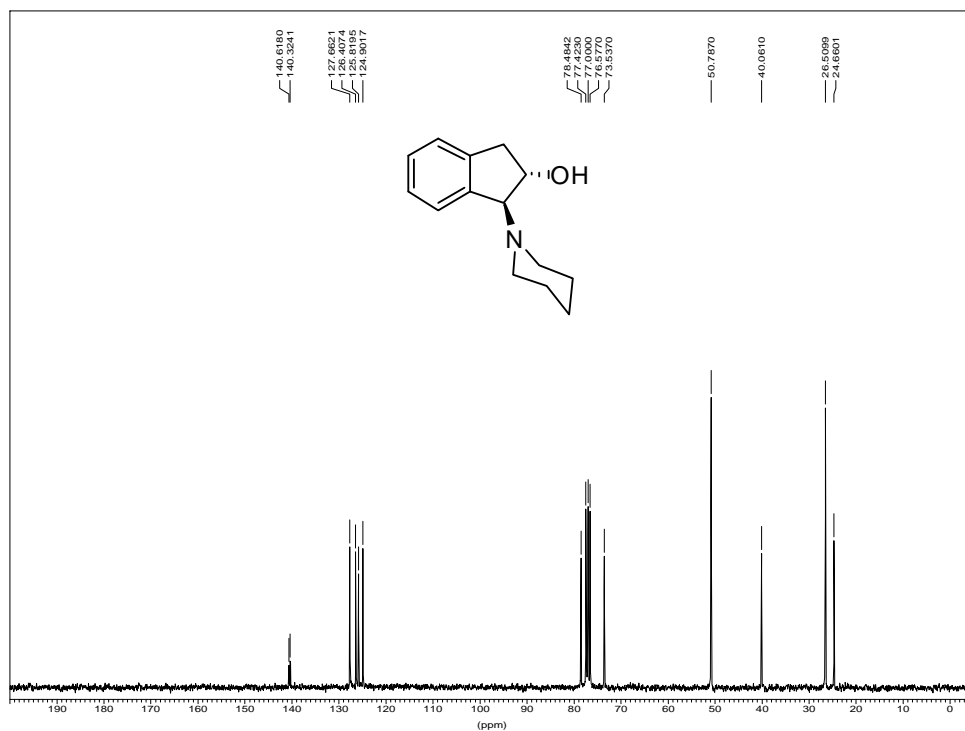

Compound **p**

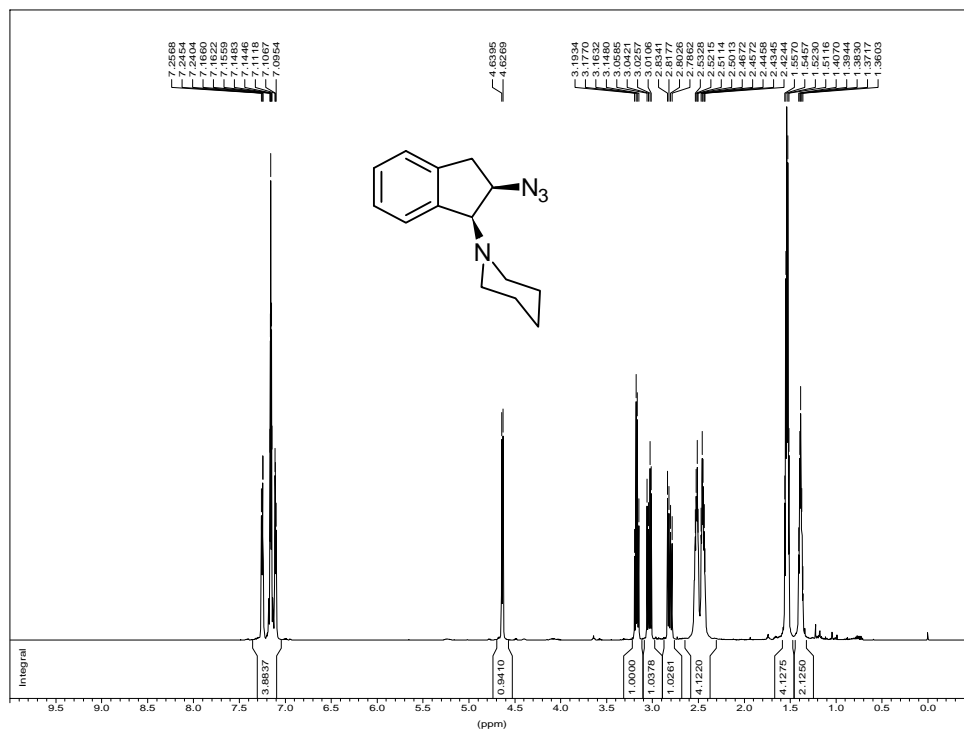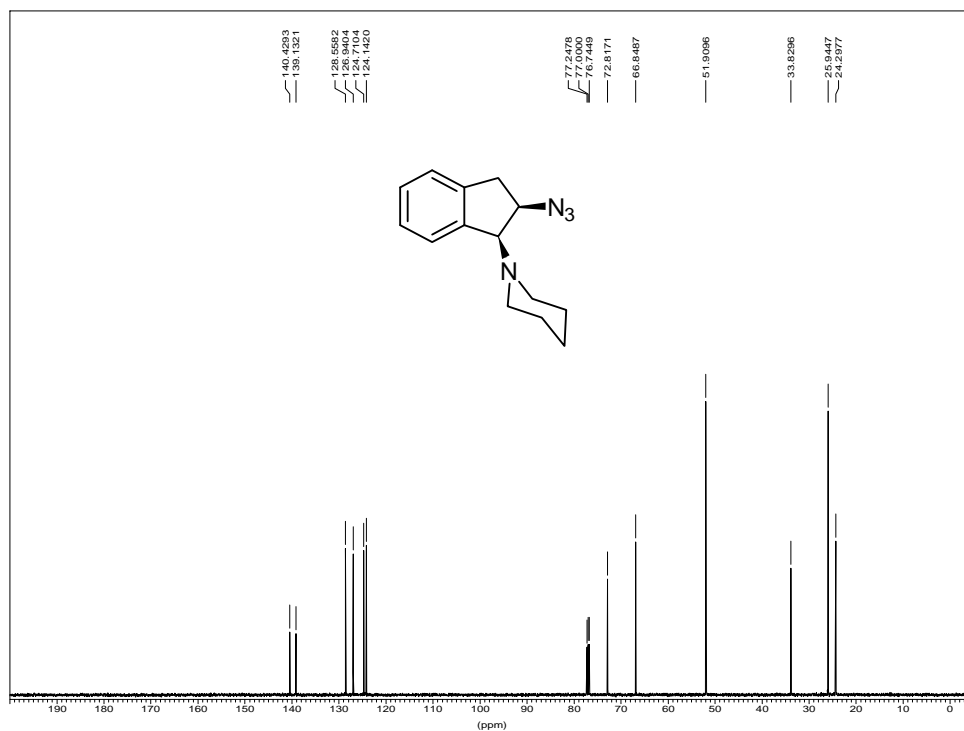

Compound **q**

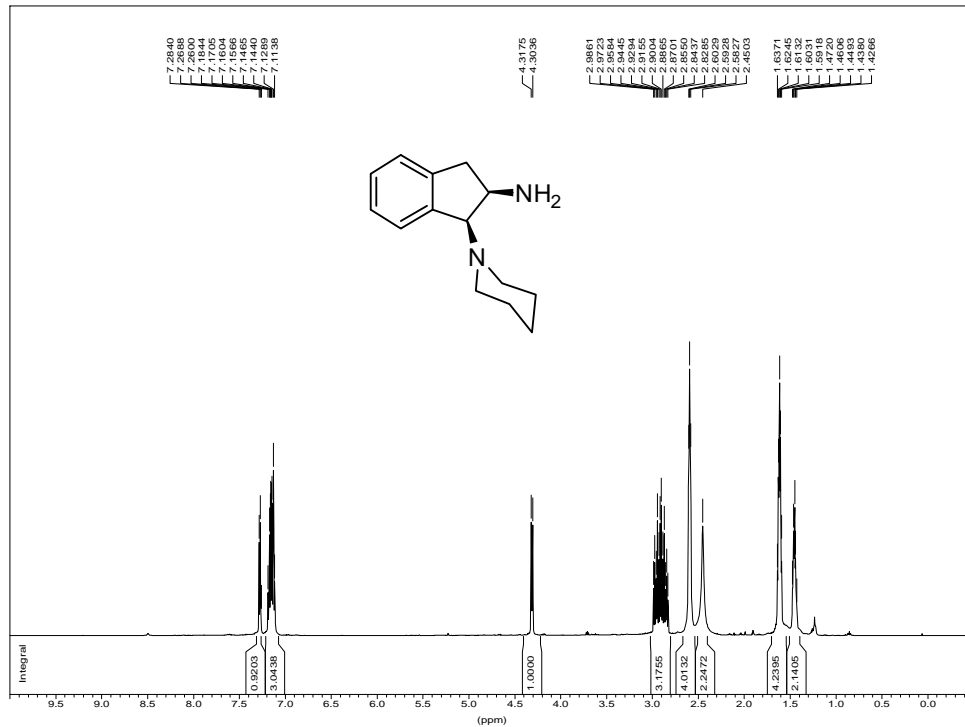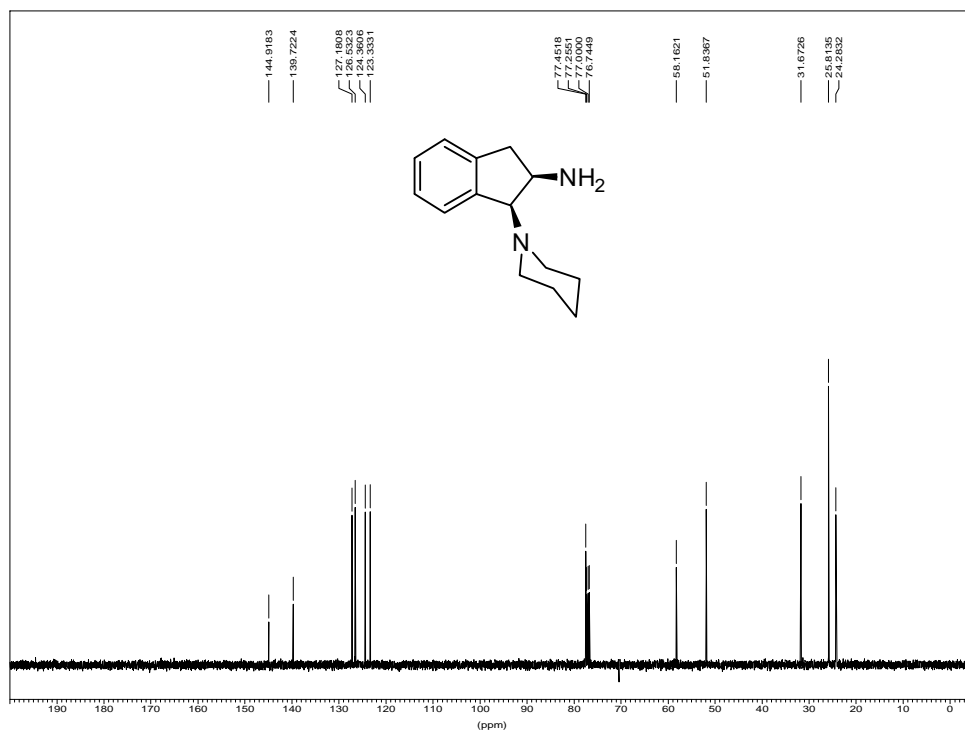



Compound 4

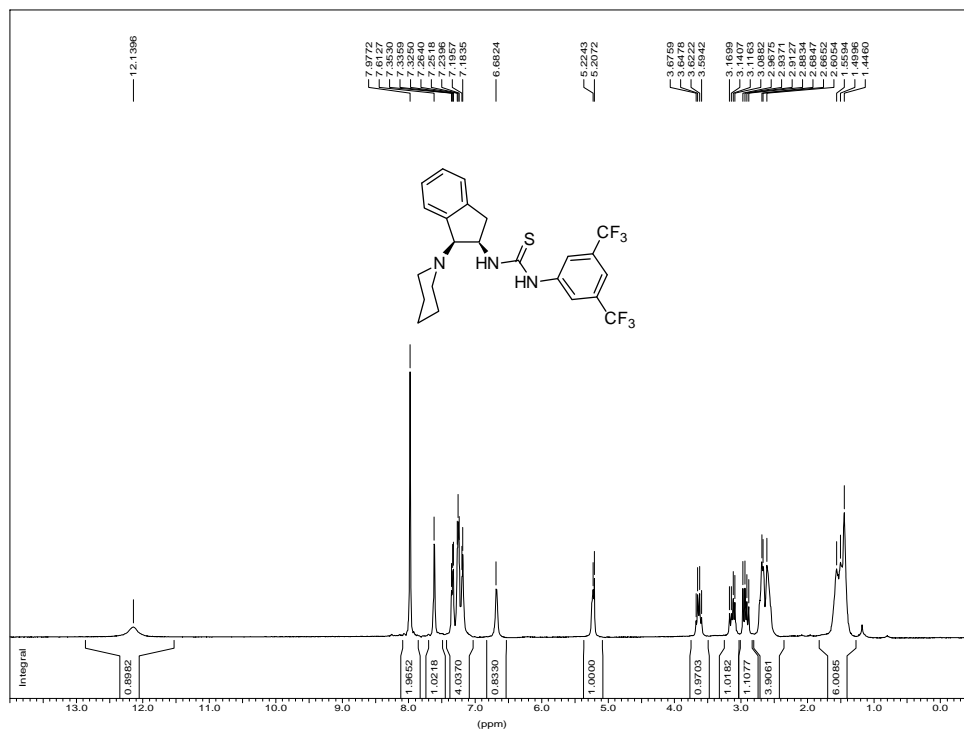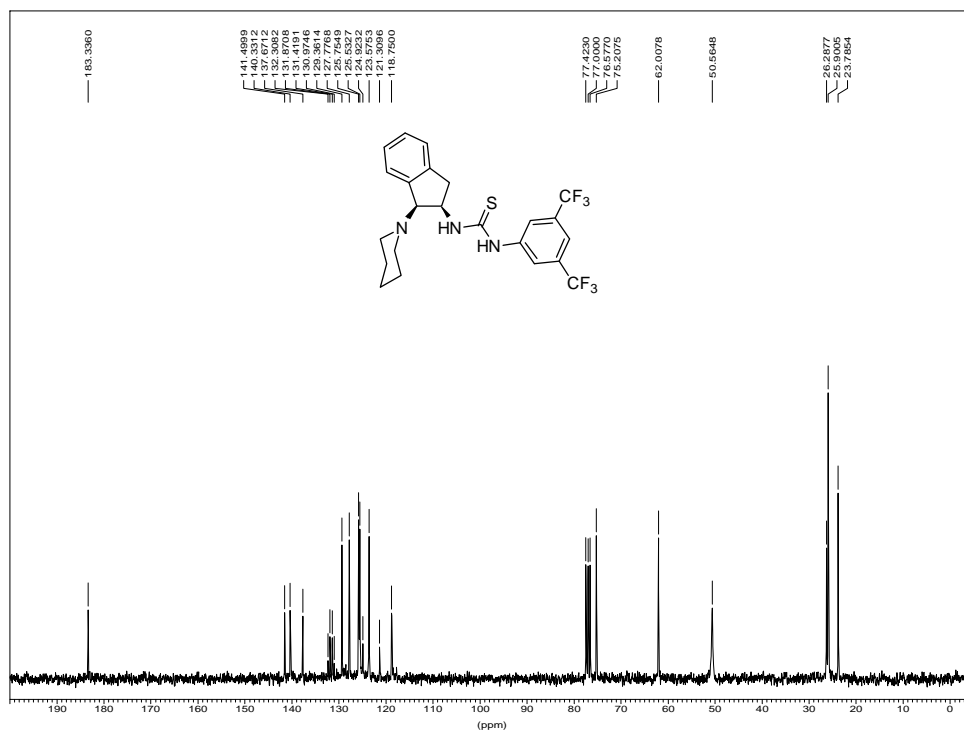

Compound **8a**

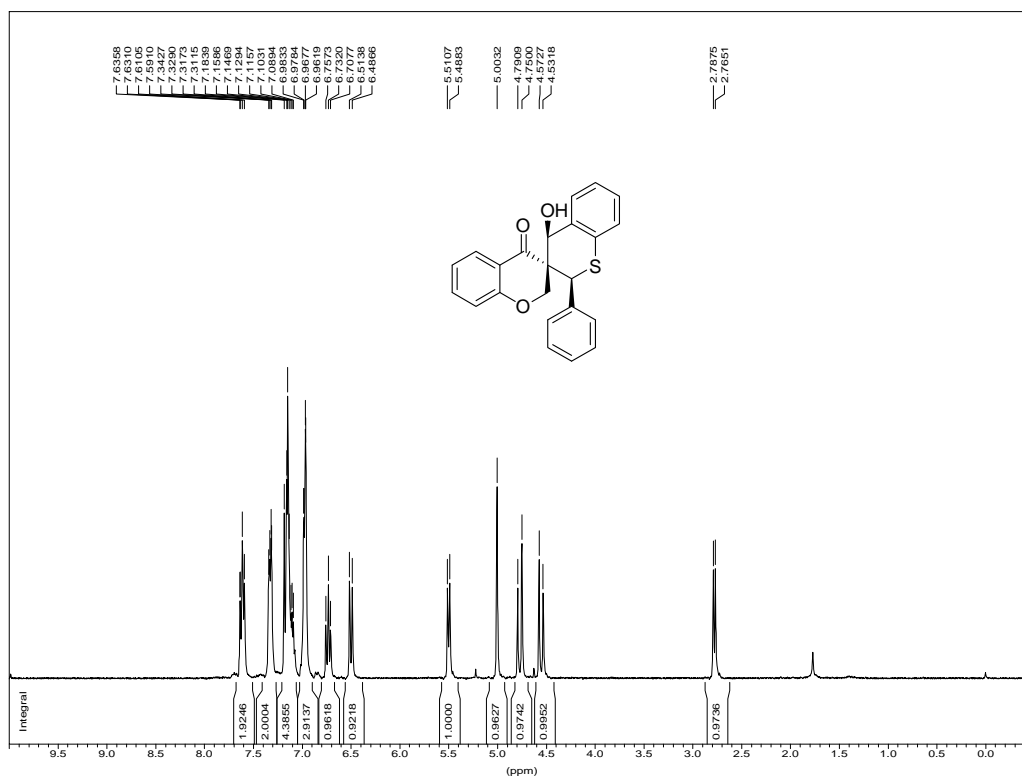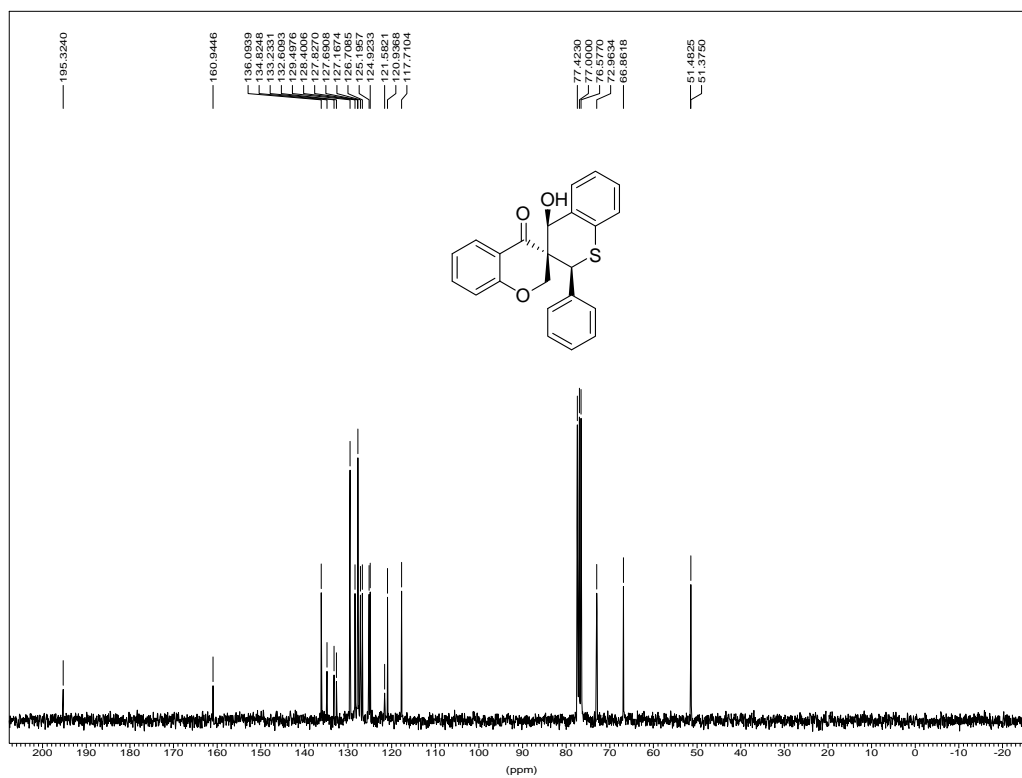

Compound **8b**

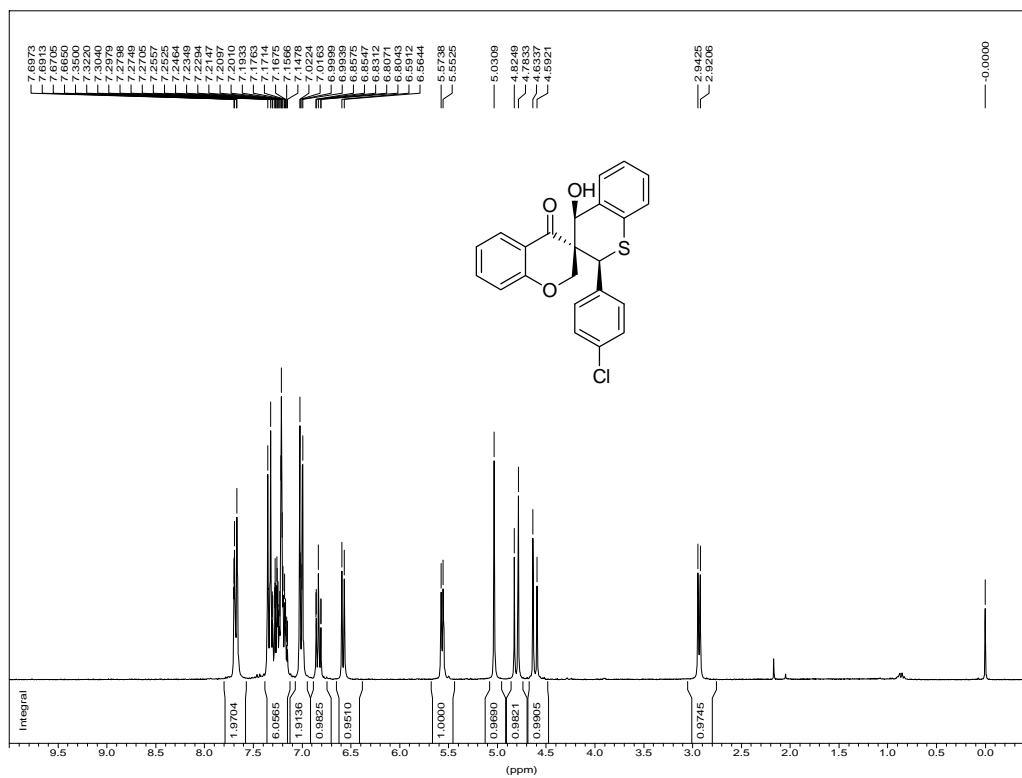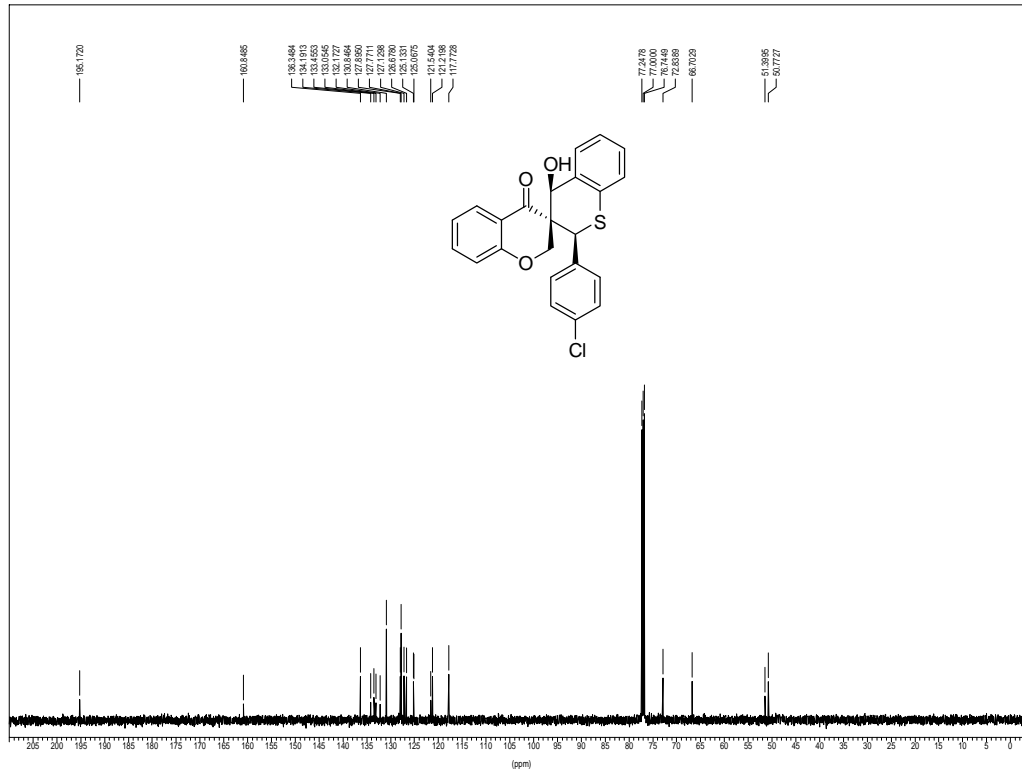

Compound **8c**

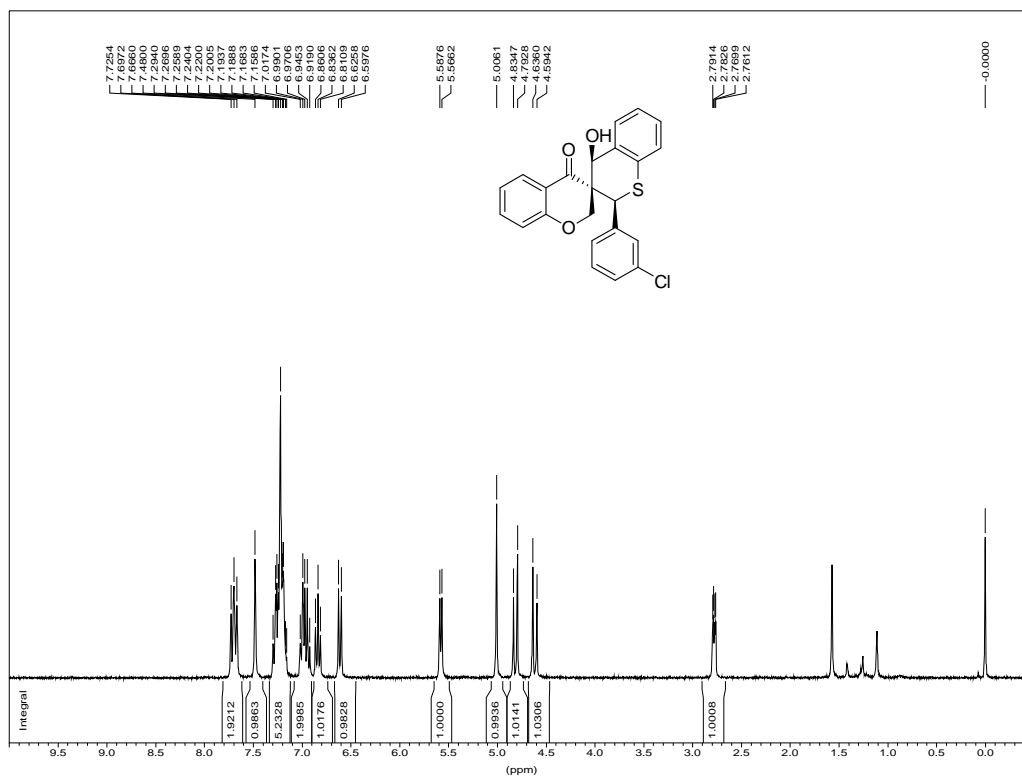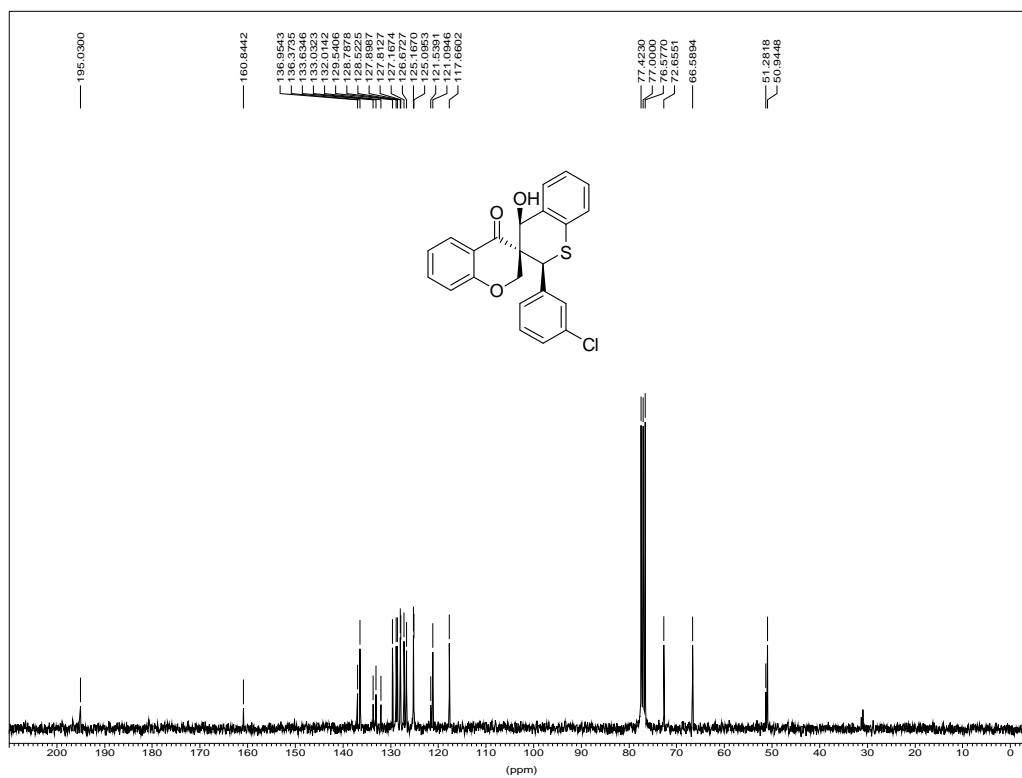

Compound **8d**

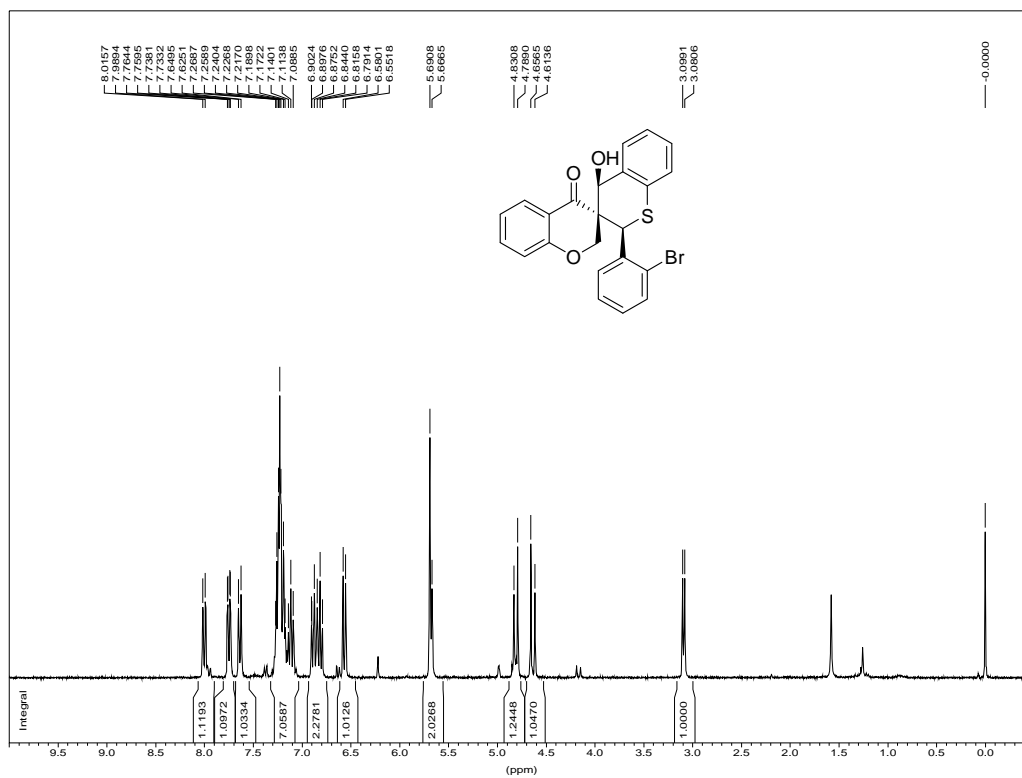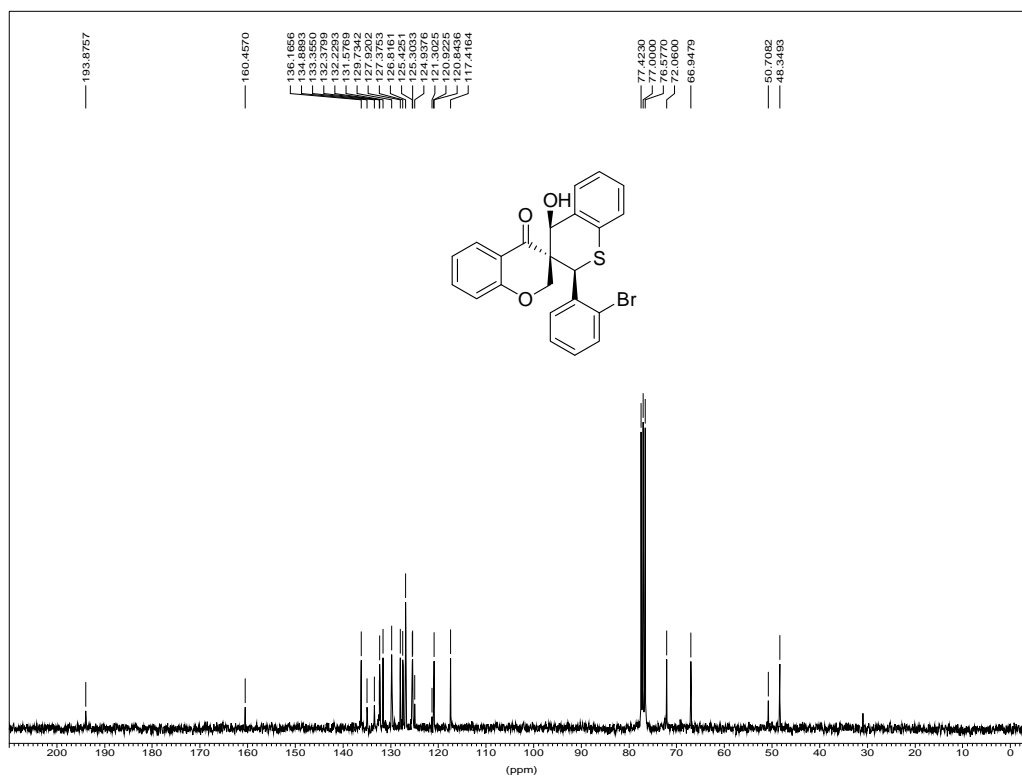

Compound **8e**

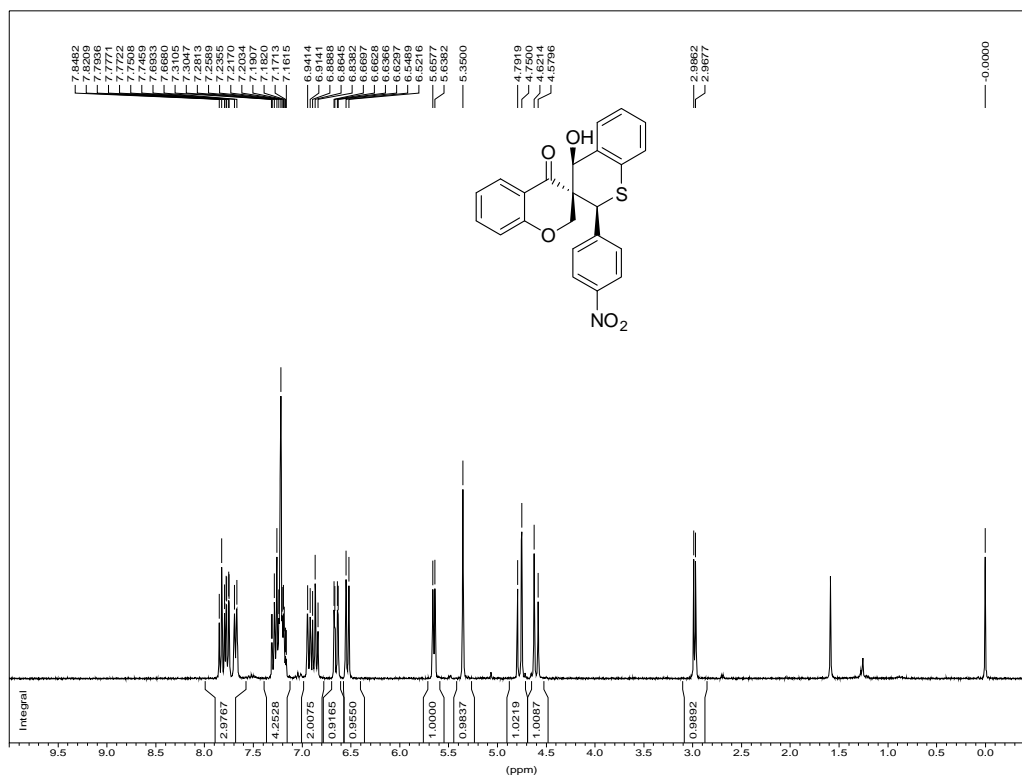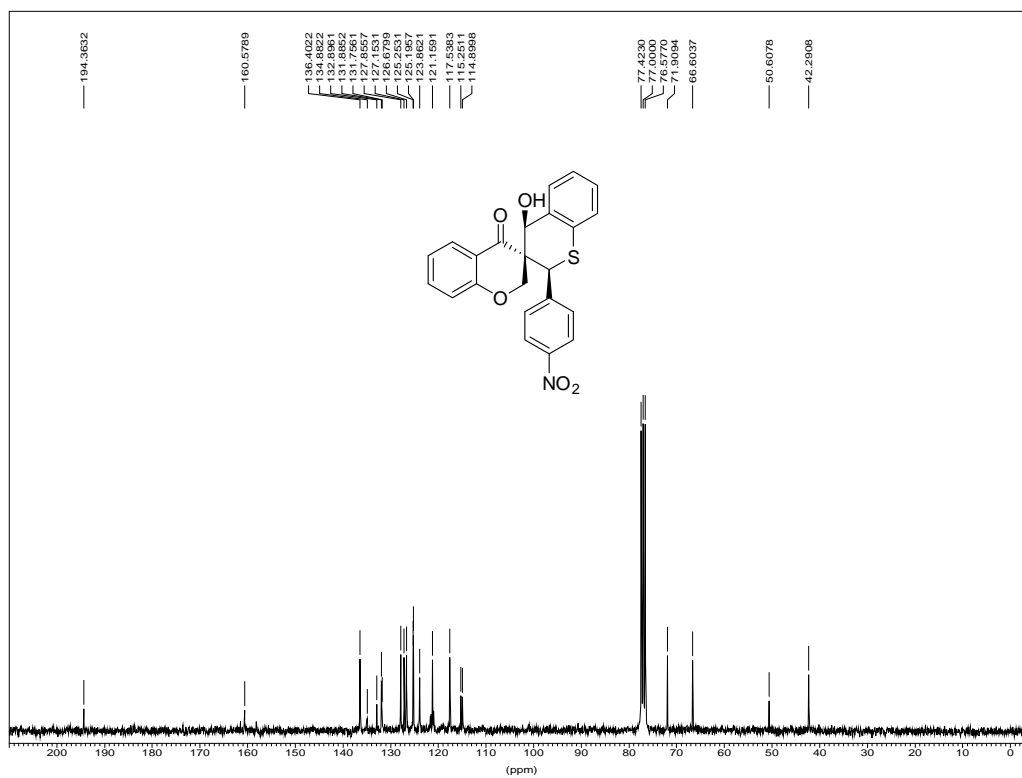

Compound **8f**

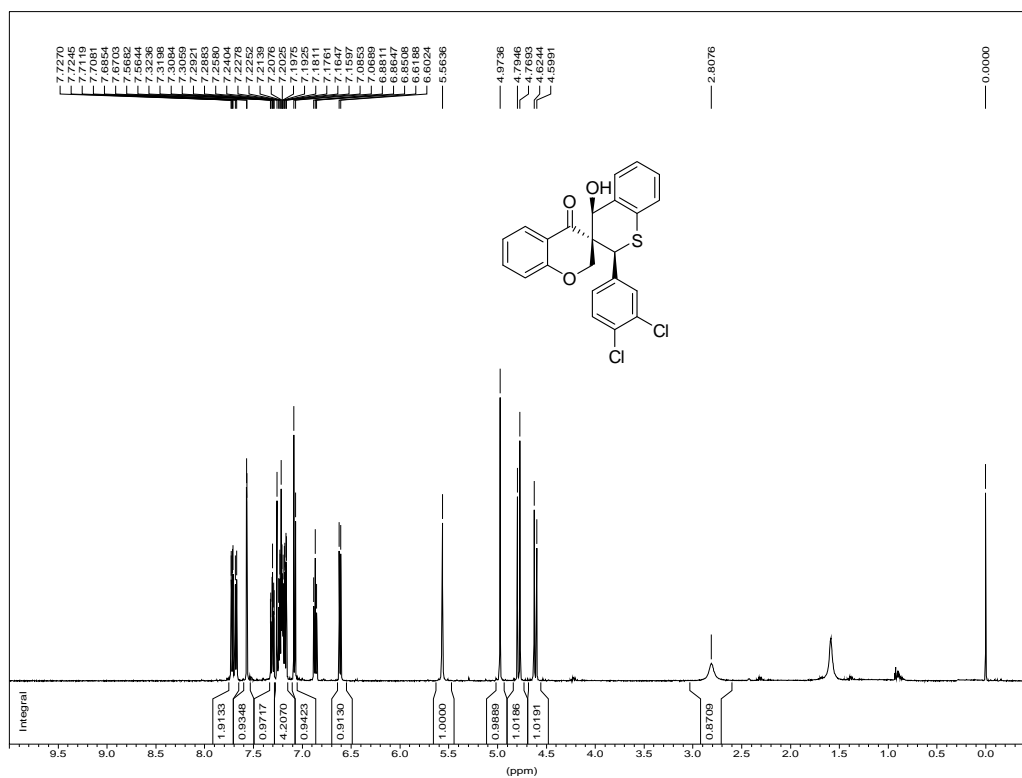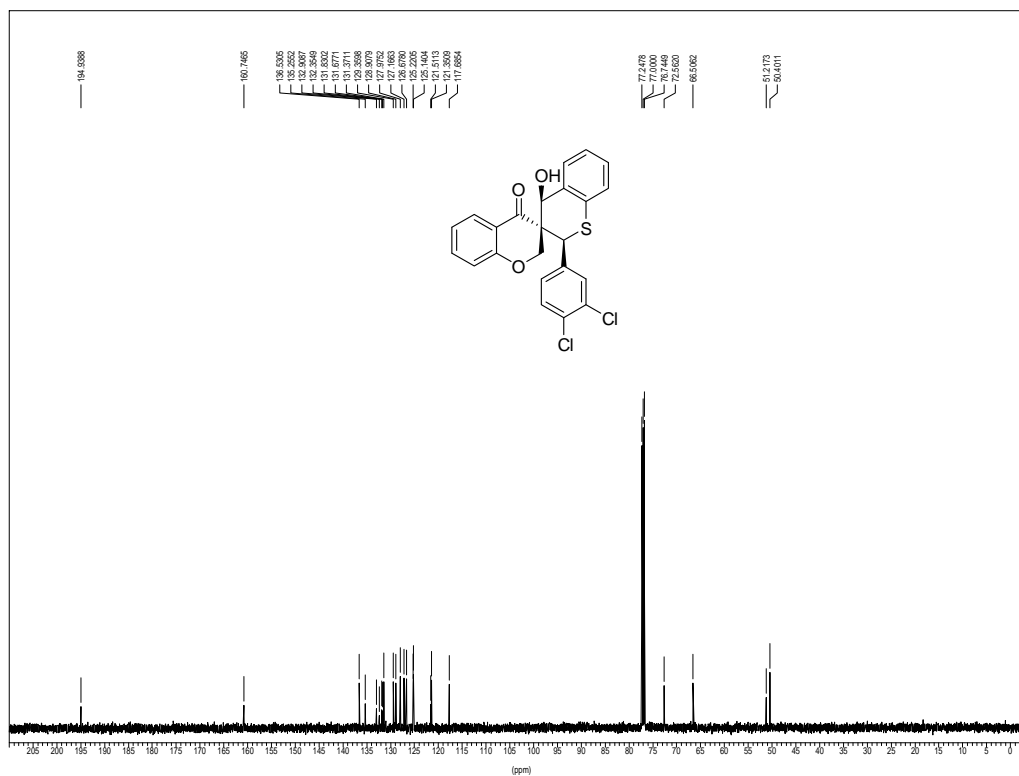

Compound **8g**

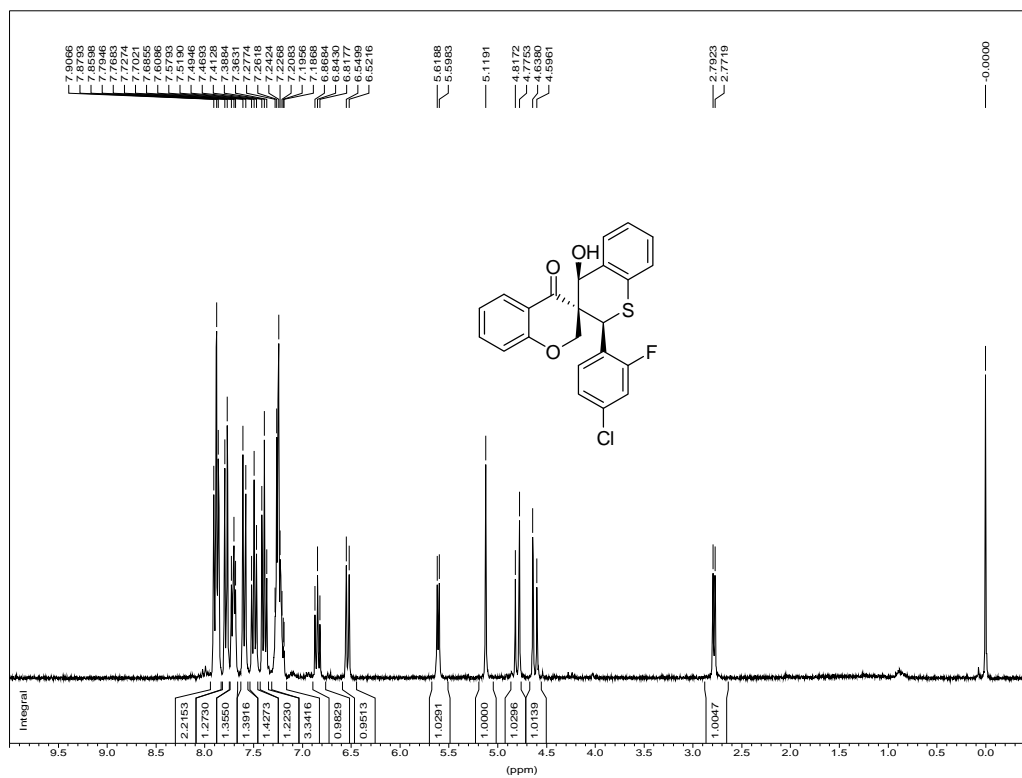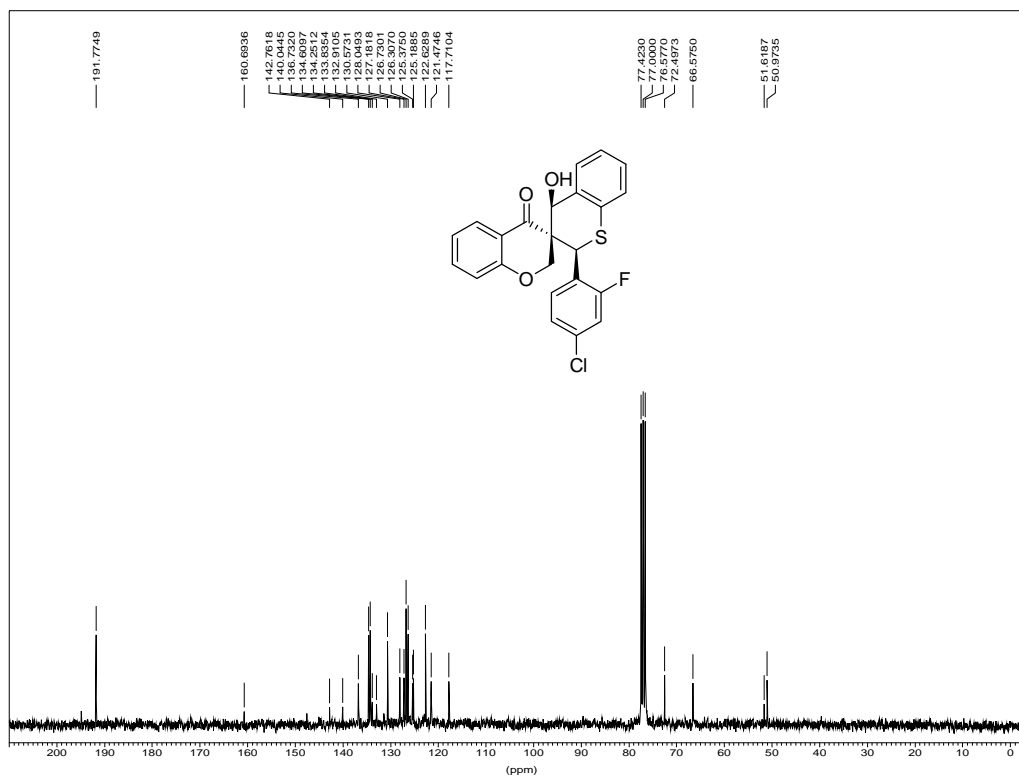



Compound **8h**

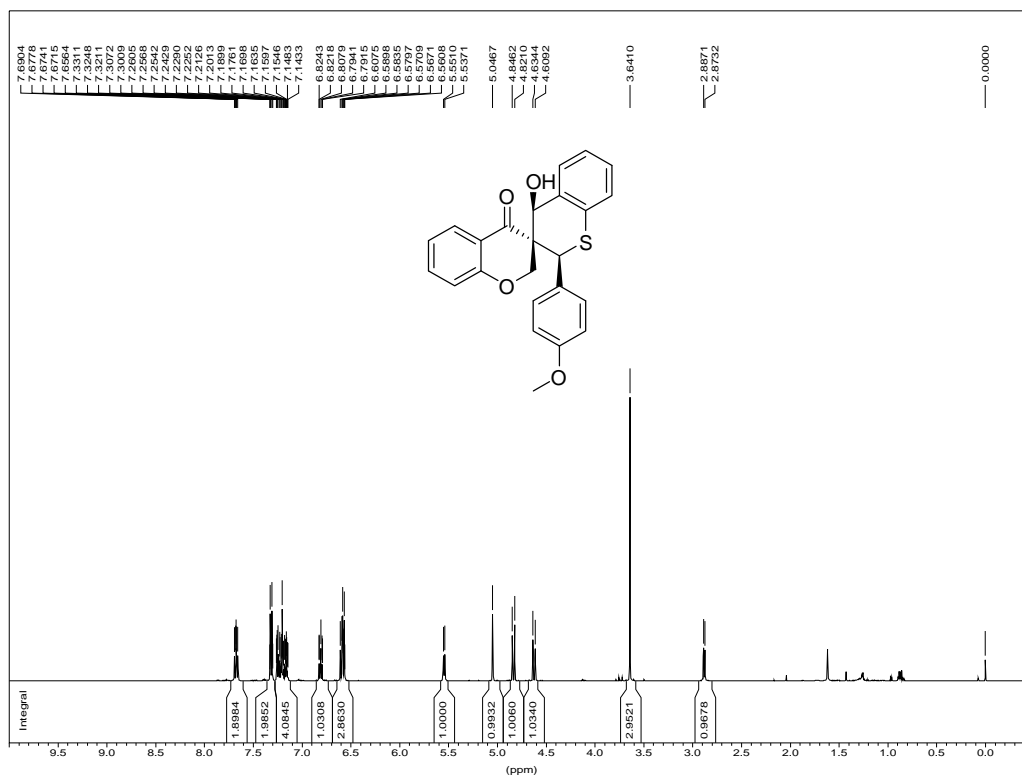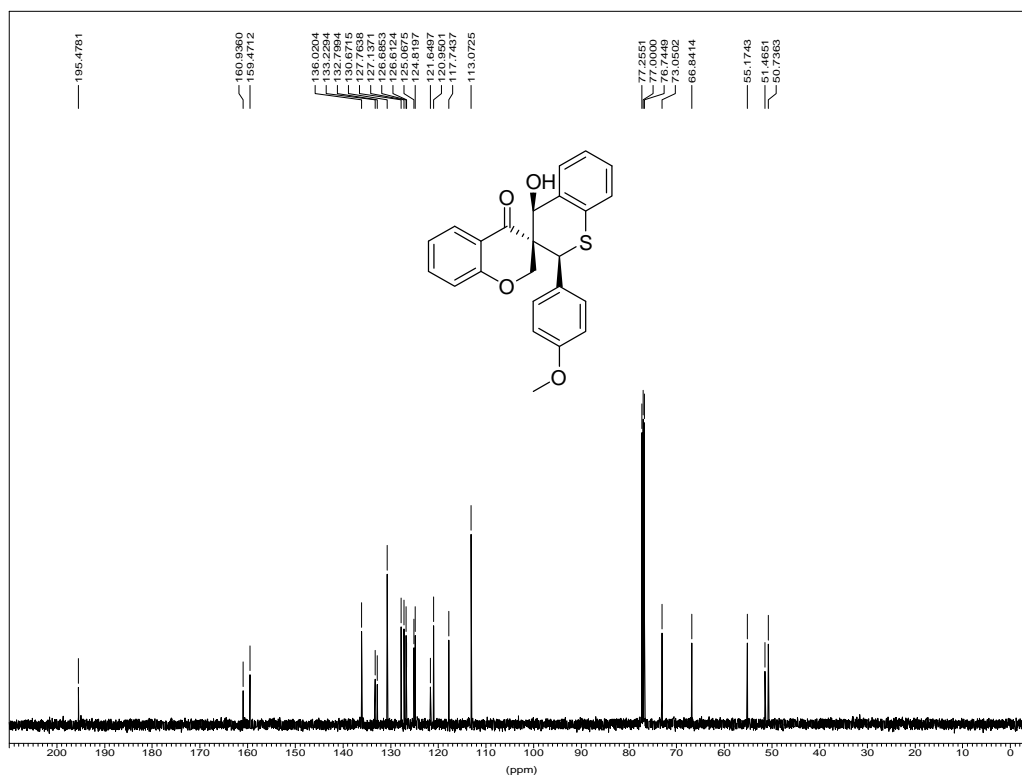

Compound **8i**

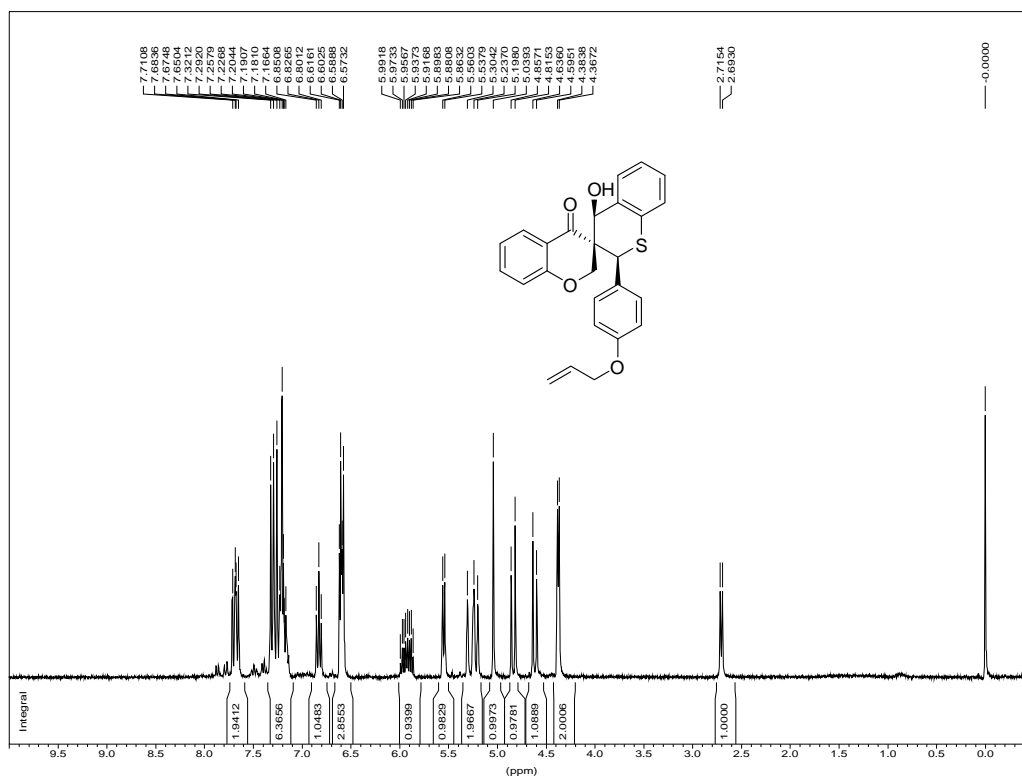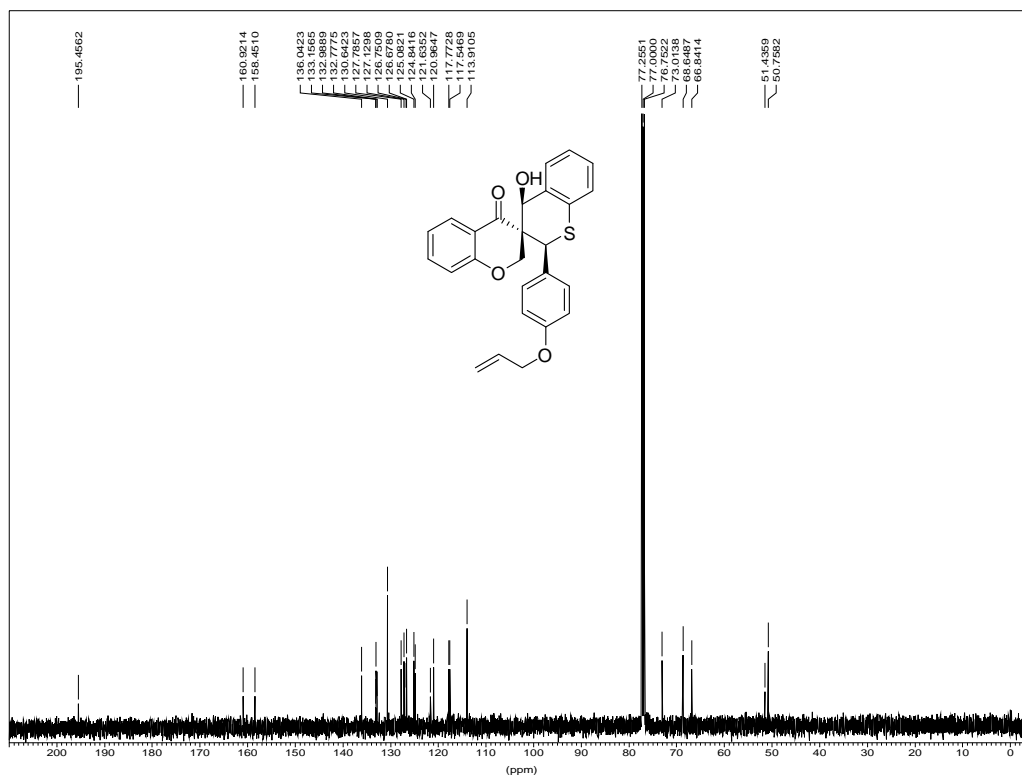

Compound **8j**

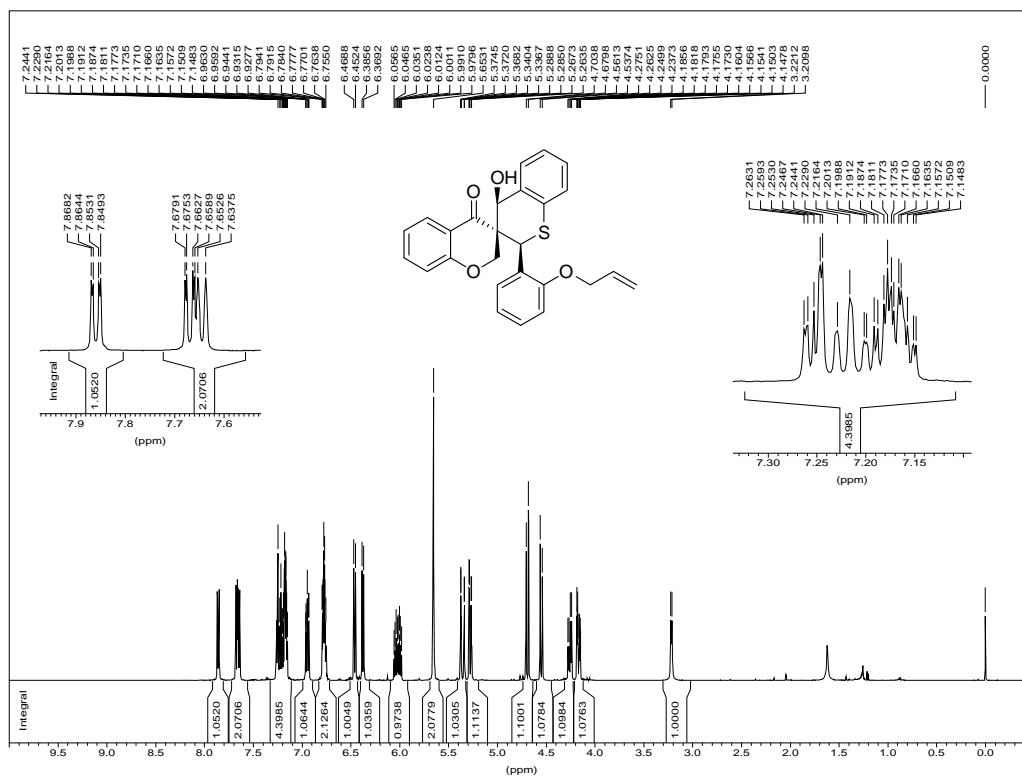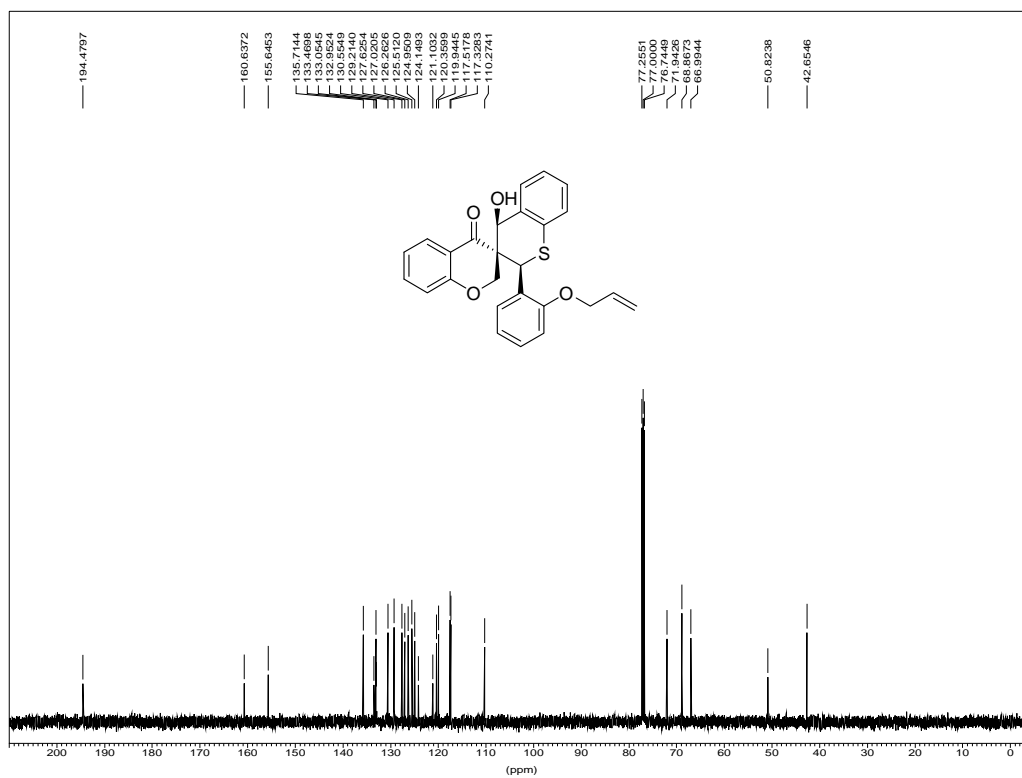

Compound **8k**

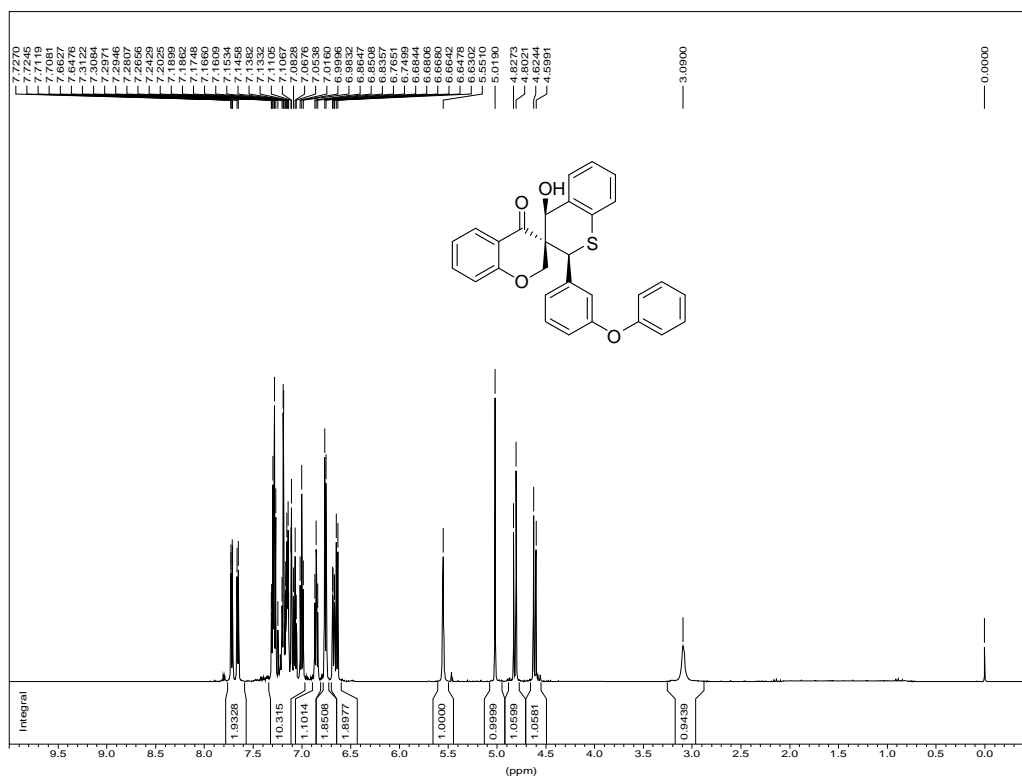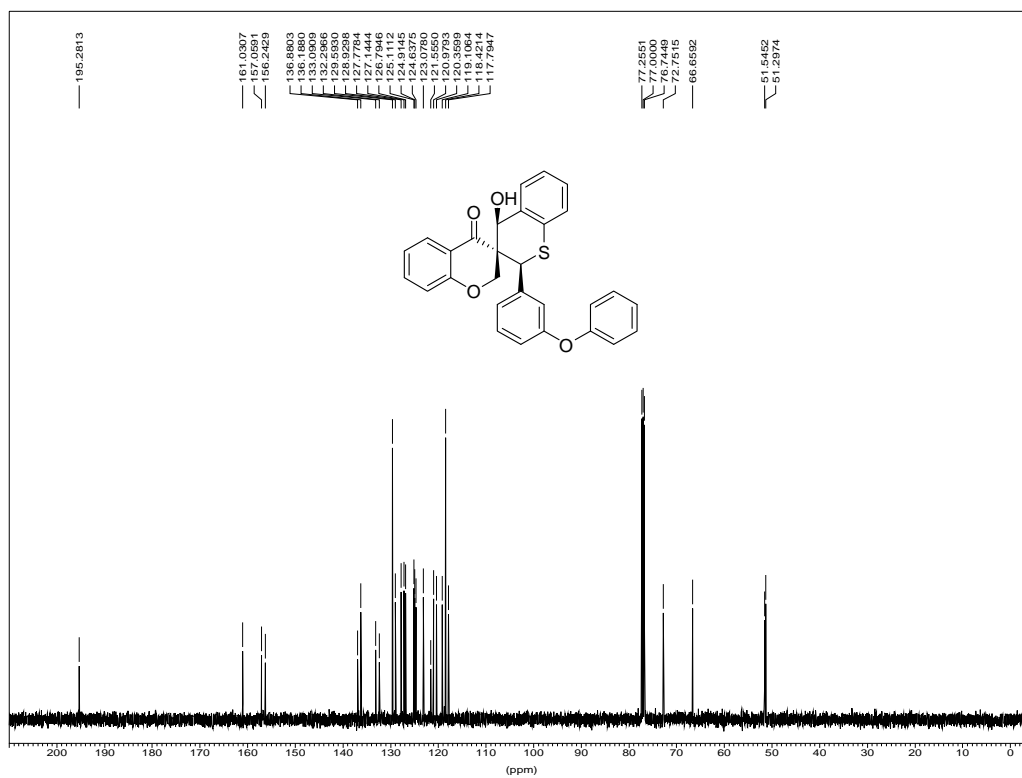

Compound **8l**

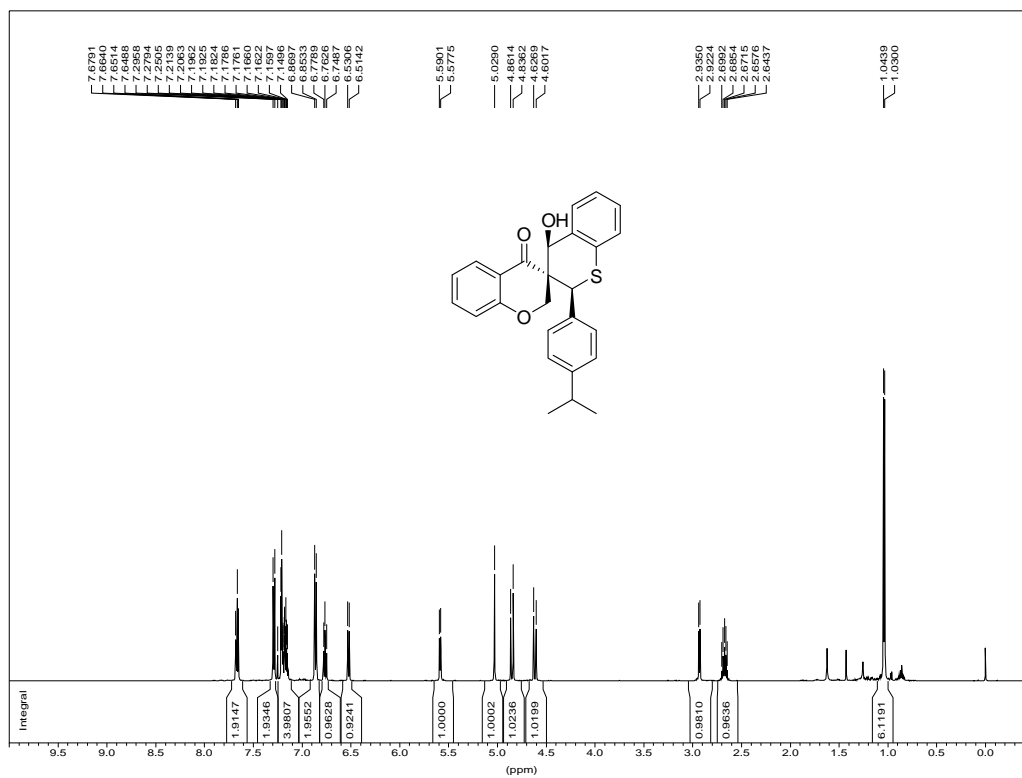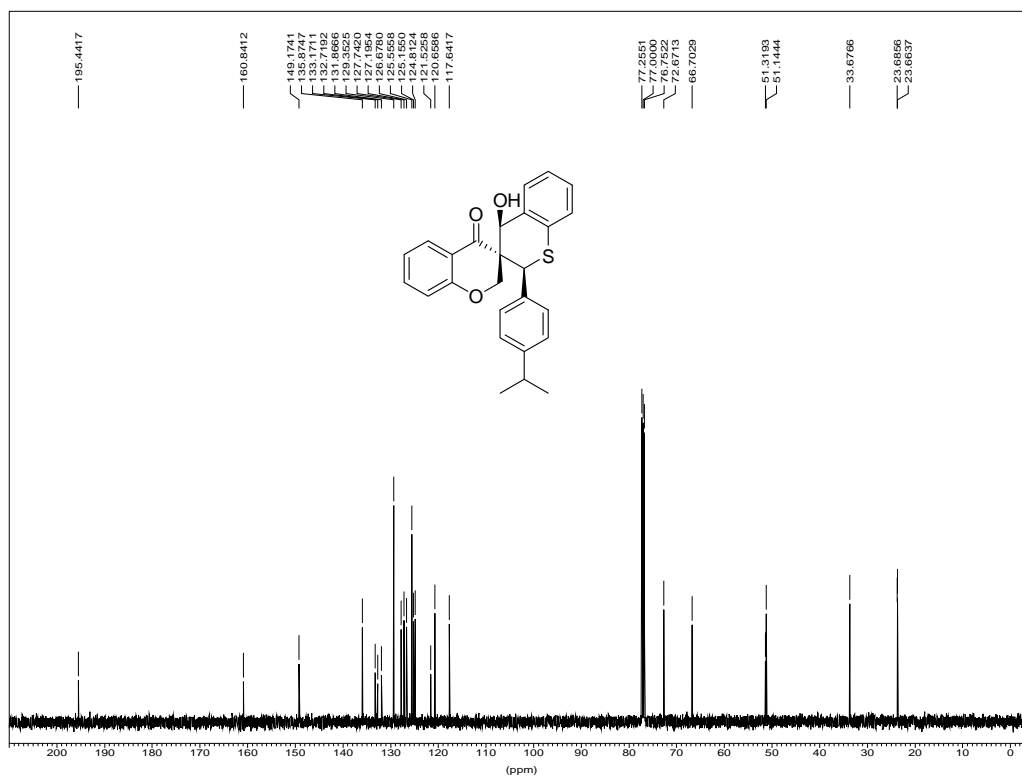



Compound **8n**

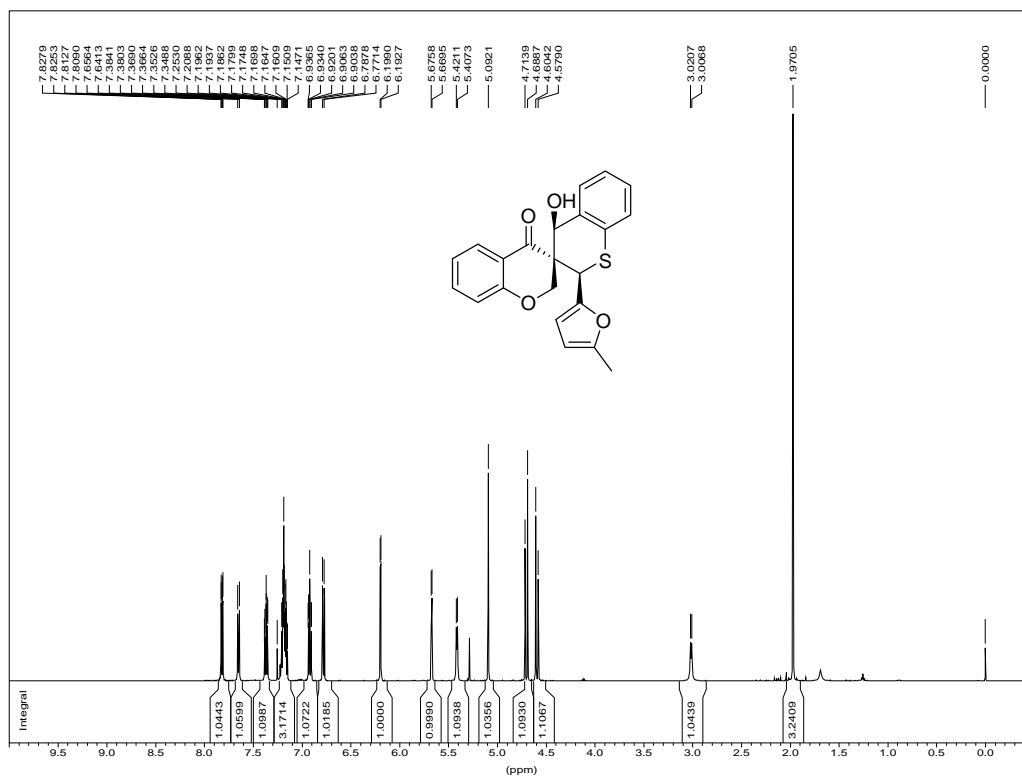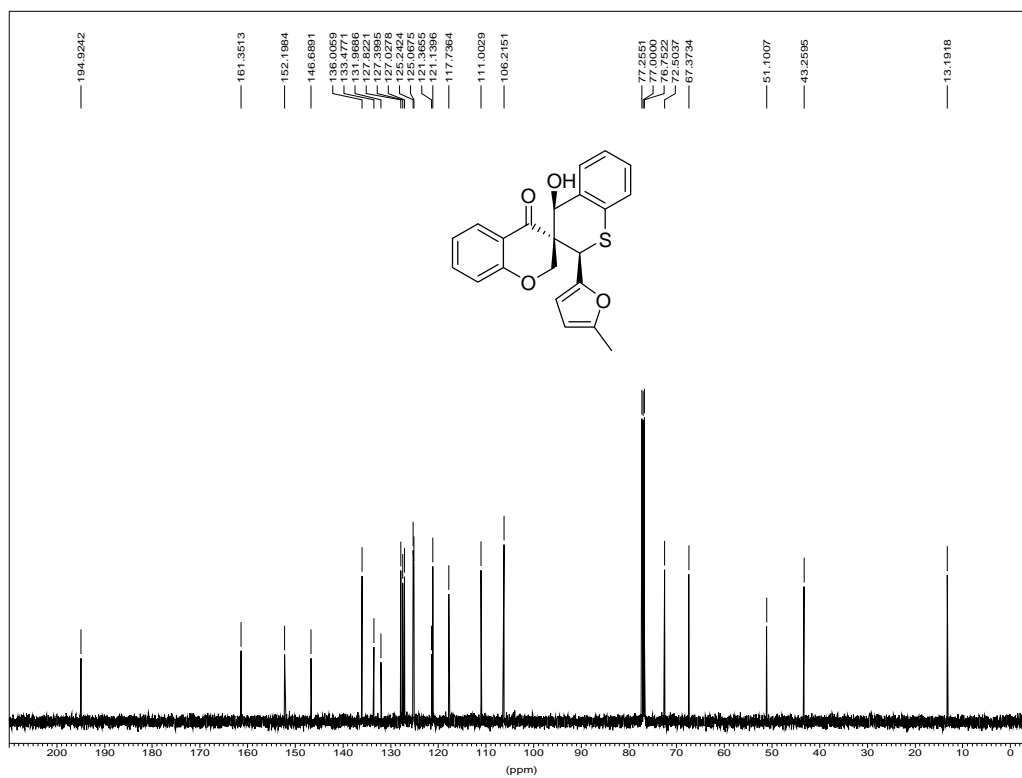

Compound **8o**

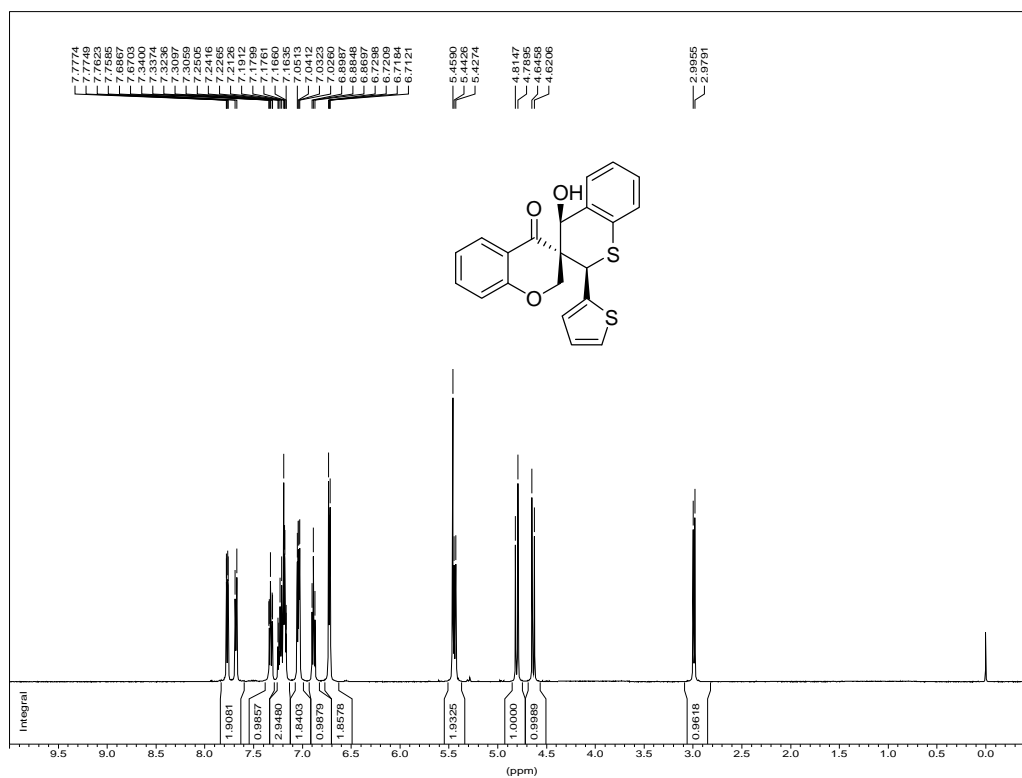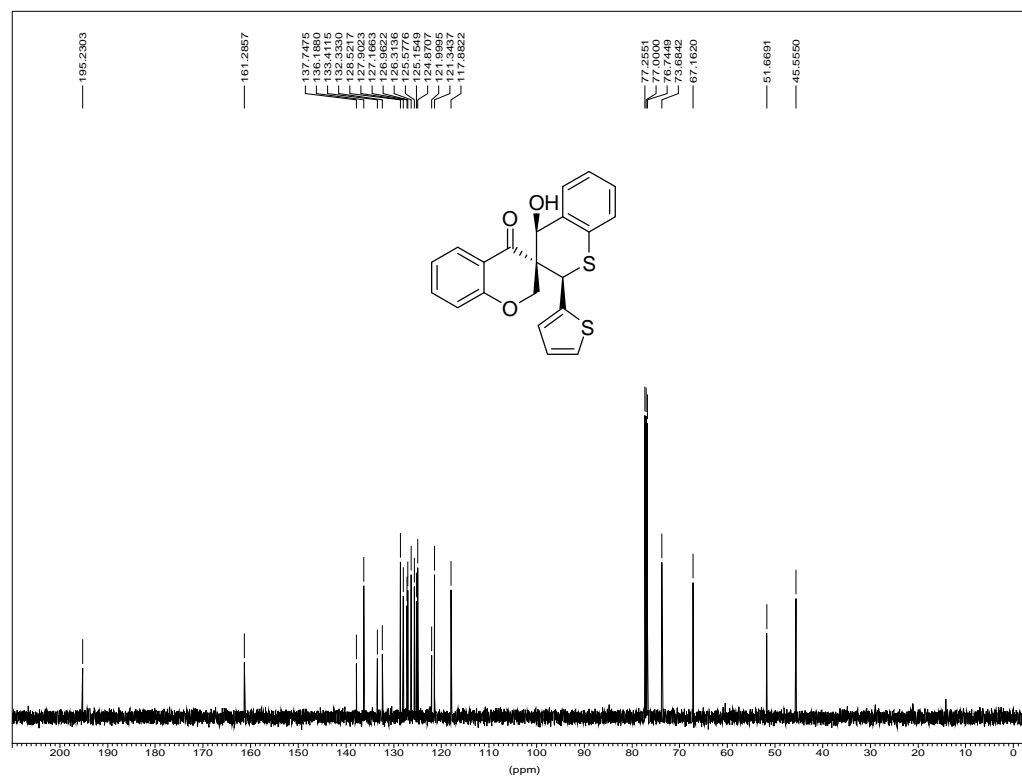



Compound **8p**

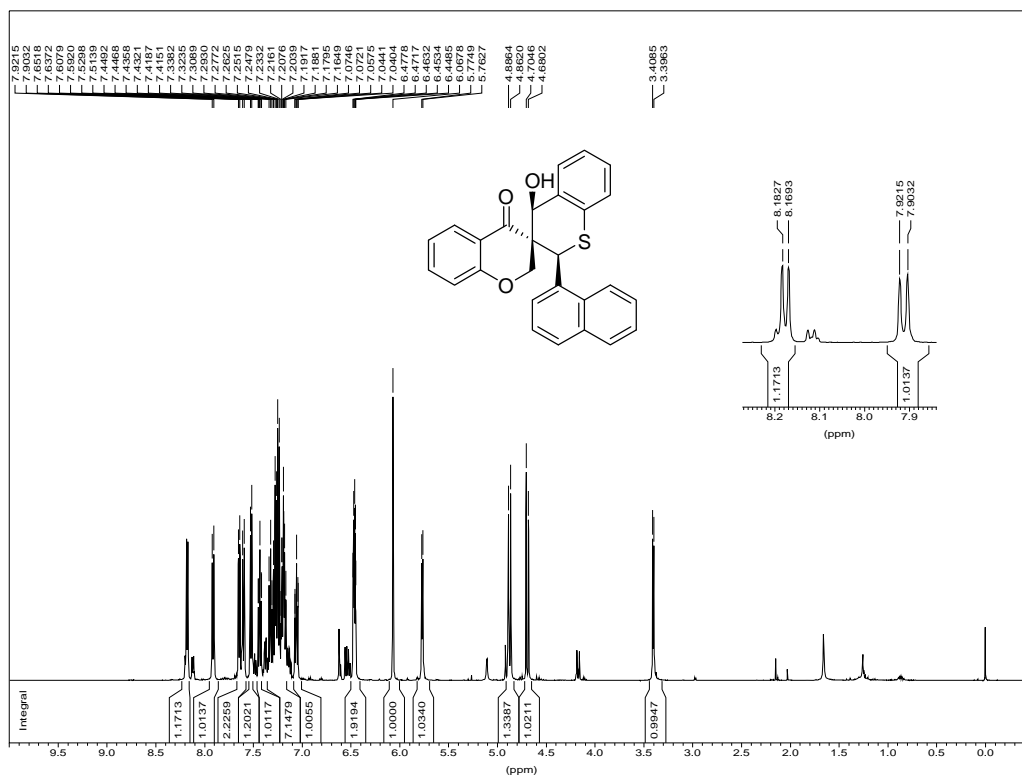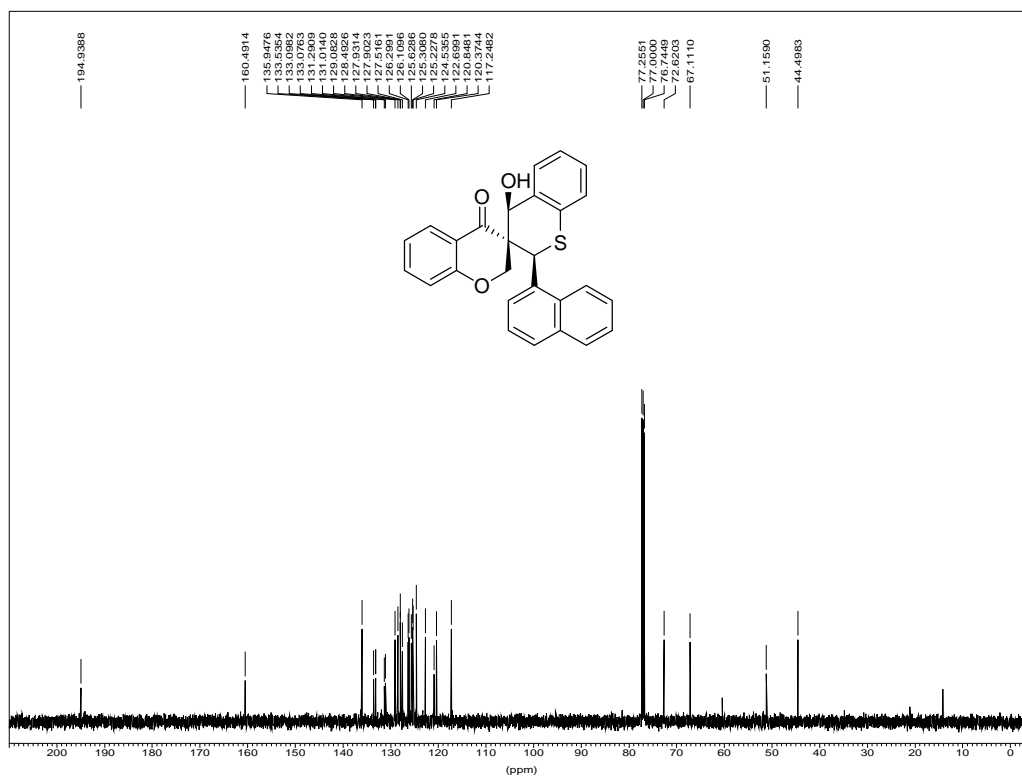

Compound **8q**

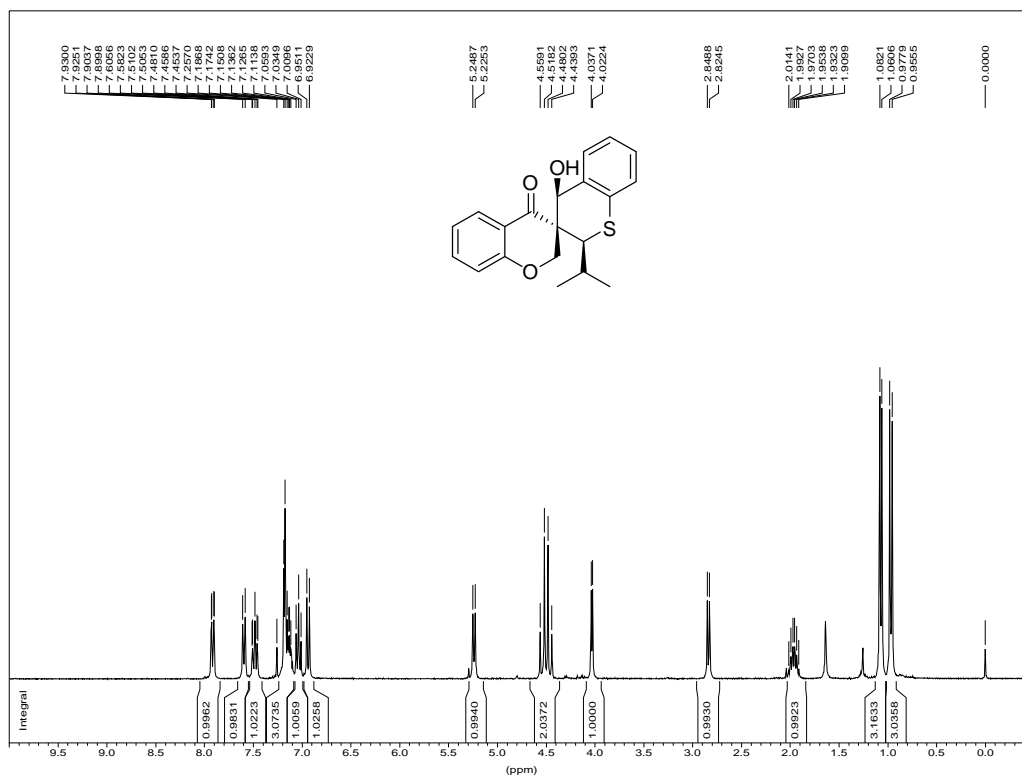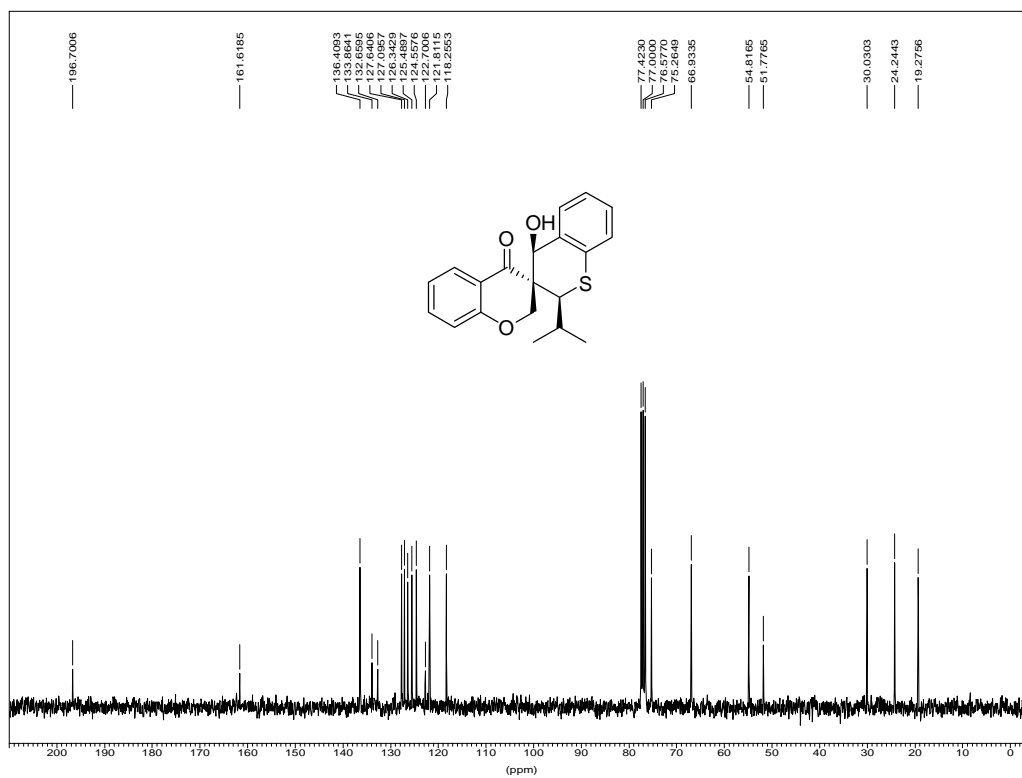

Compound **8r**

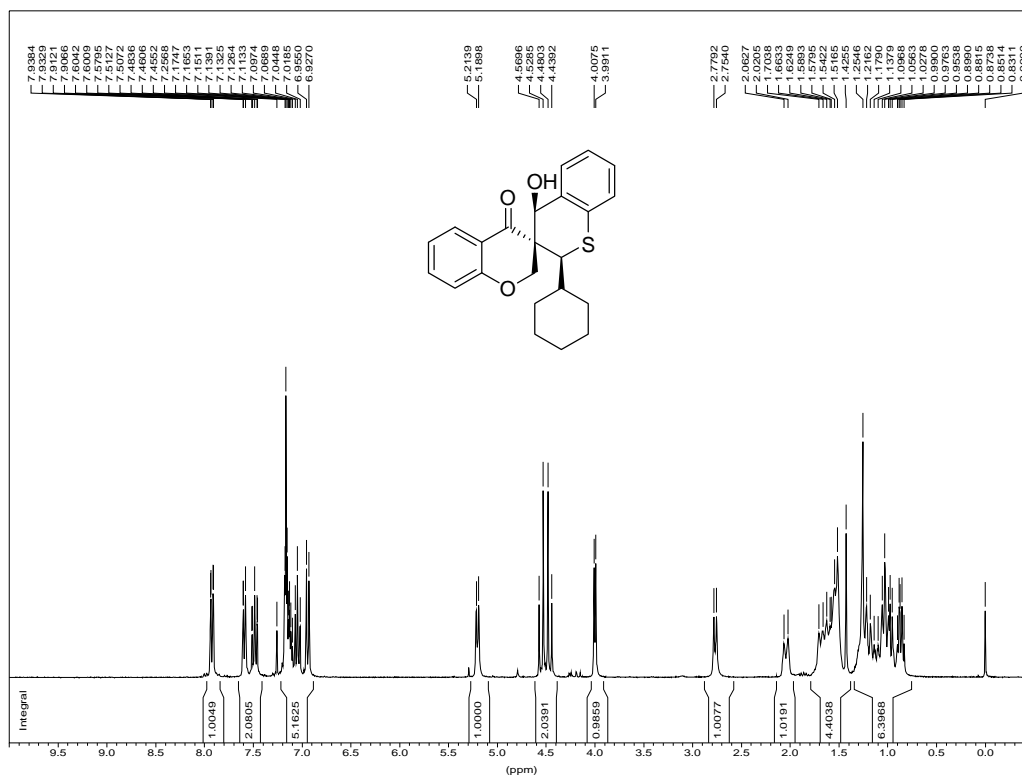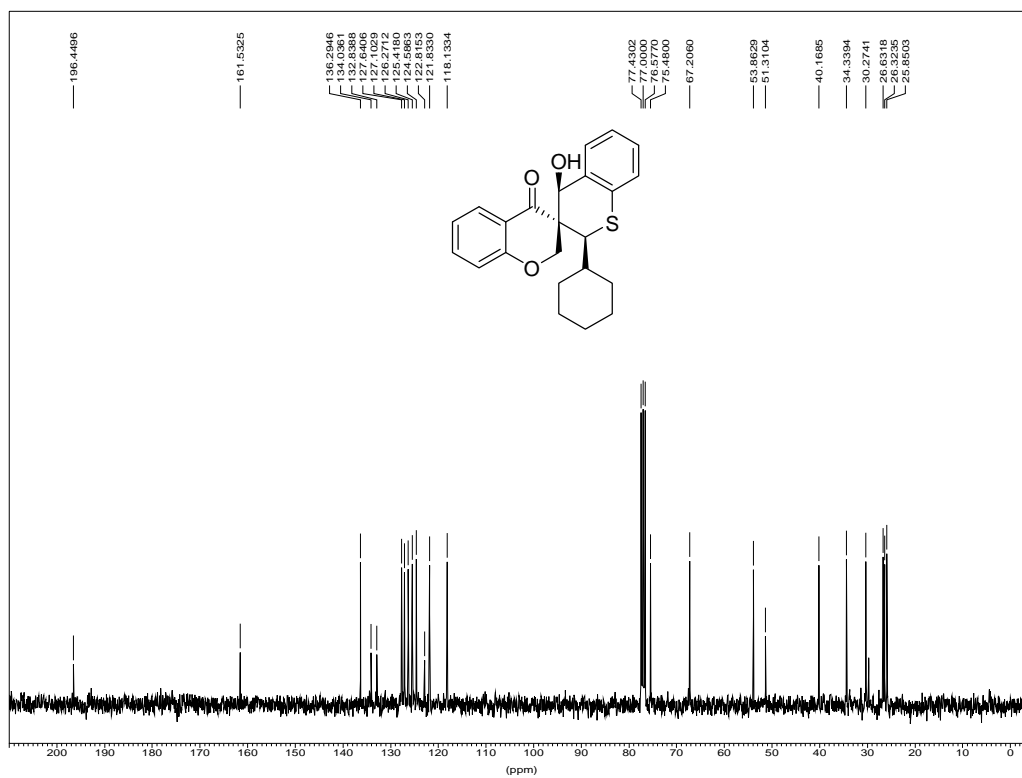

Compound **8s**

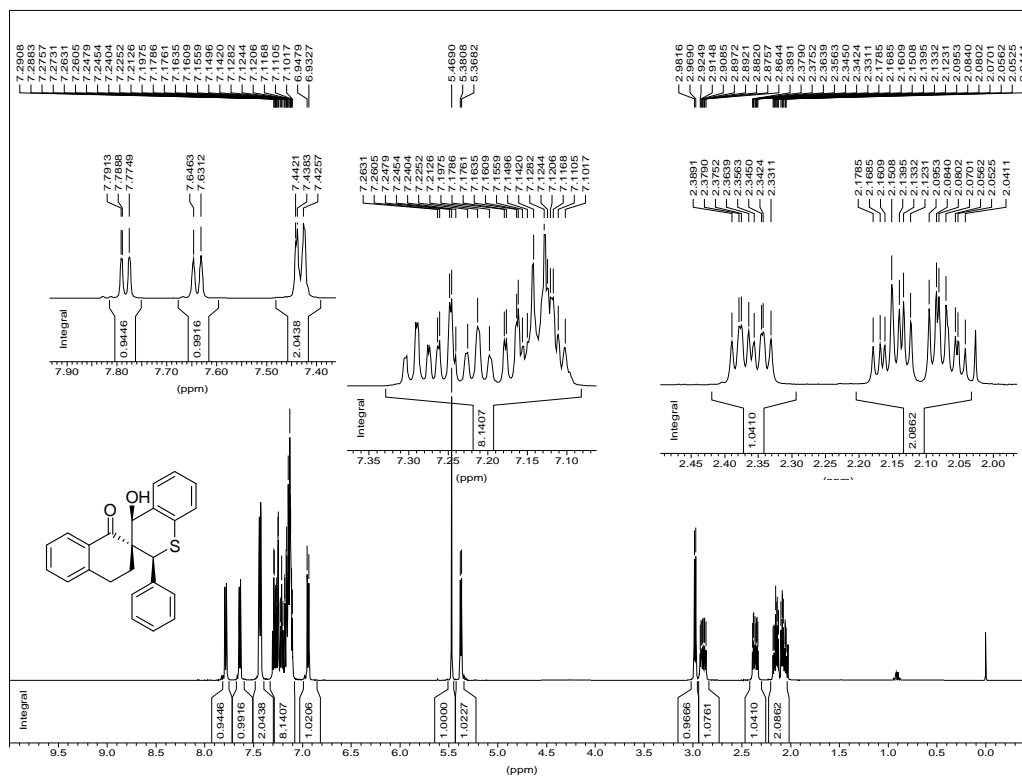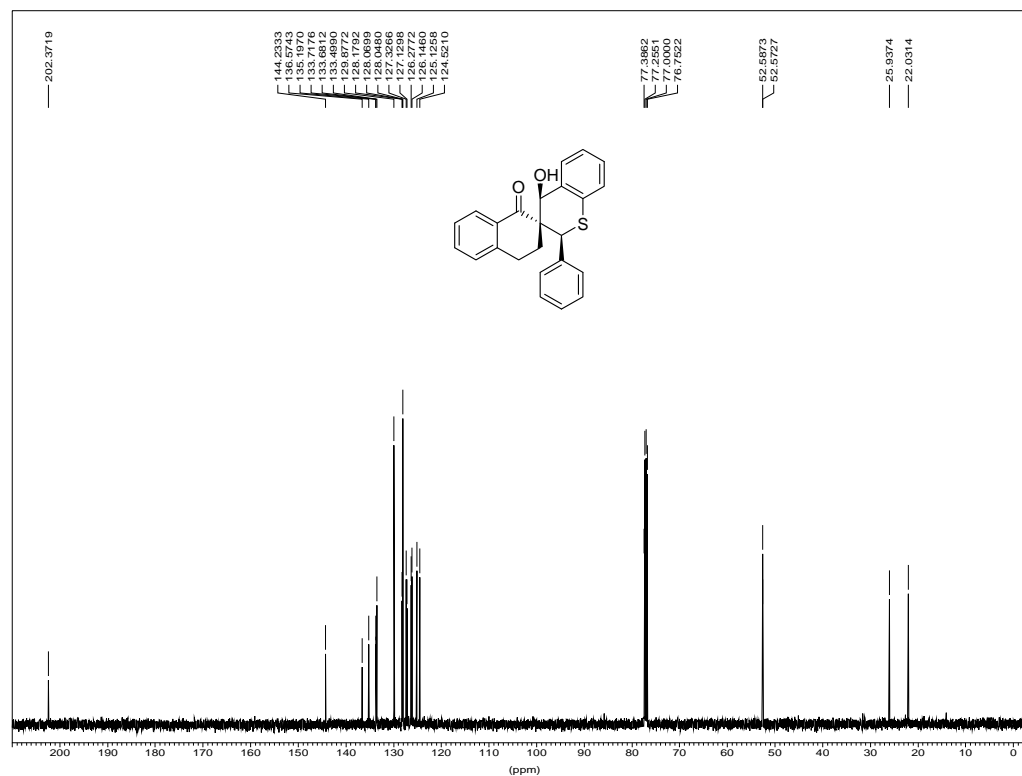

Compound **8t**

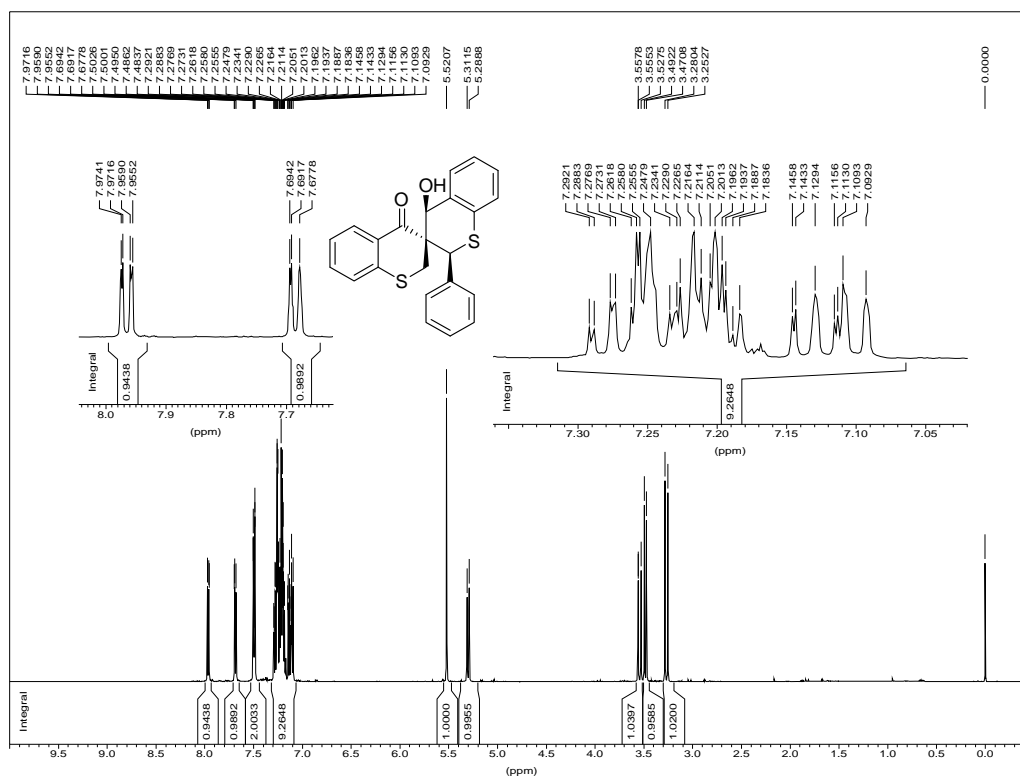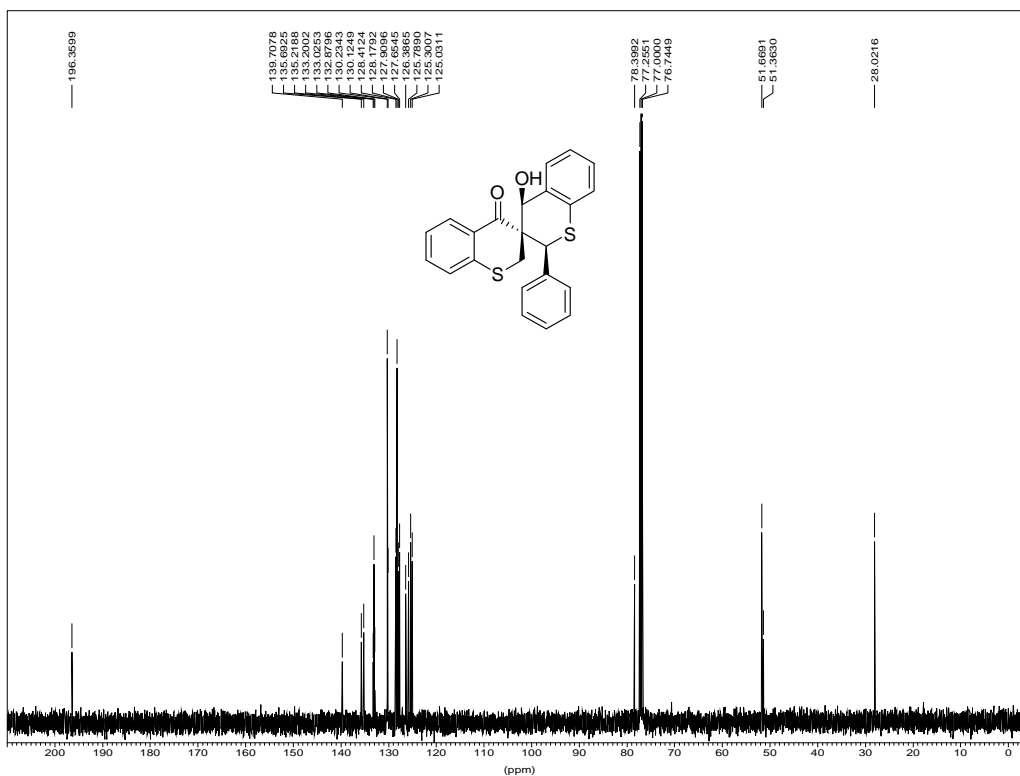

Compound **8u**

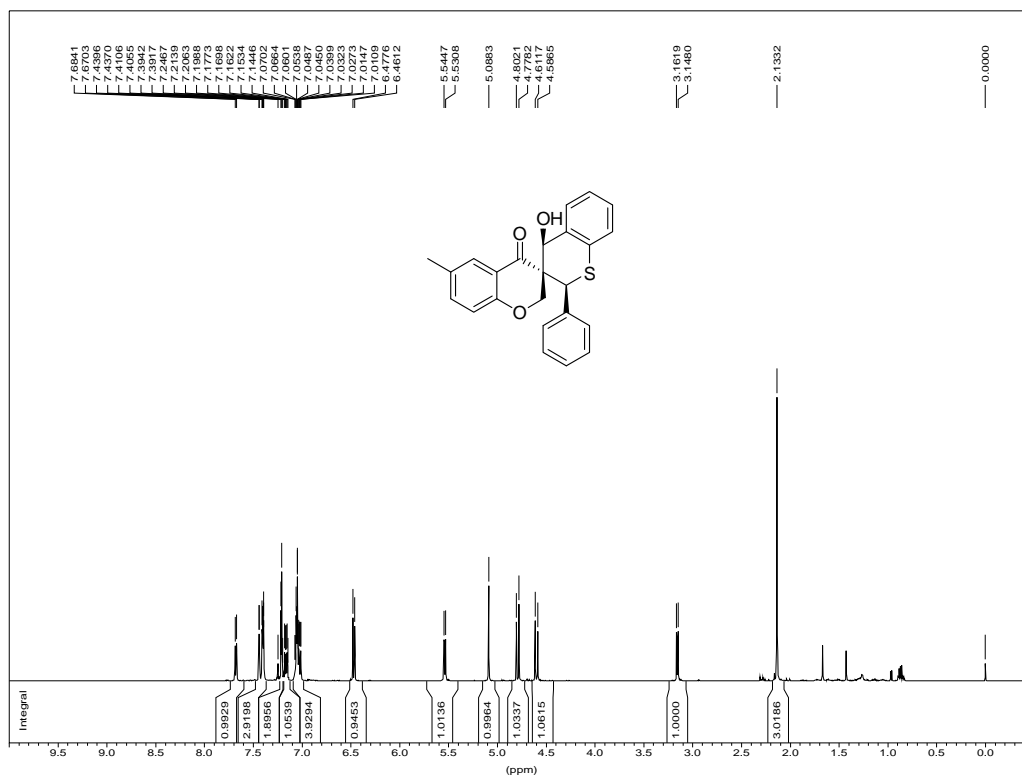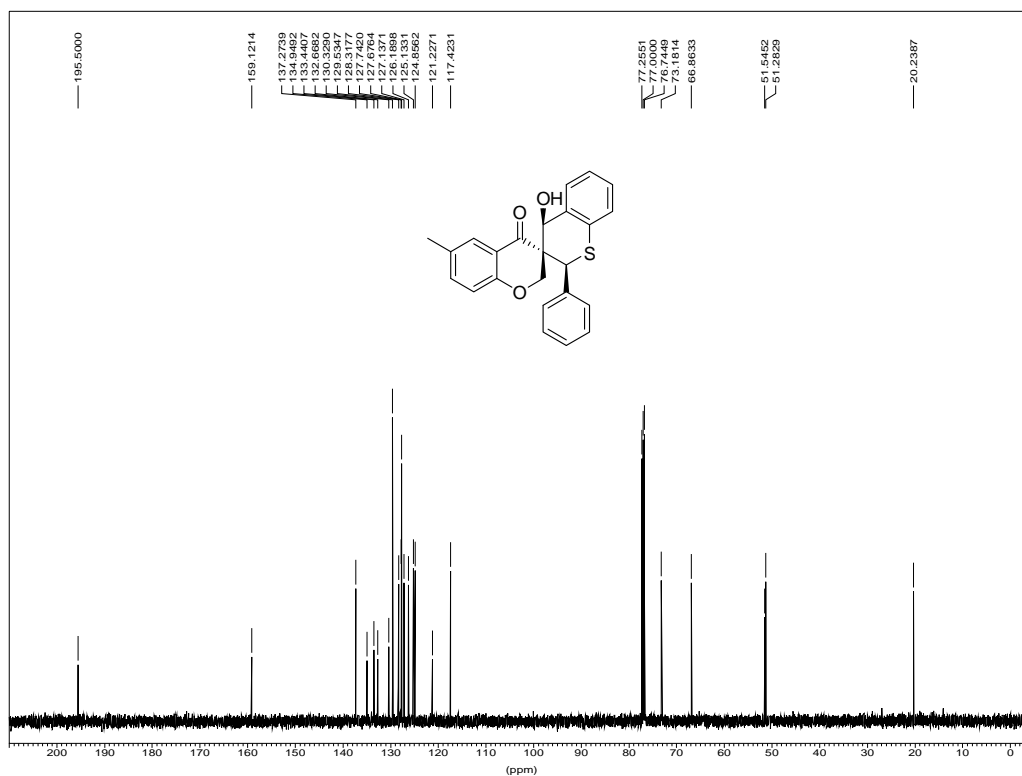

Compound **8v**

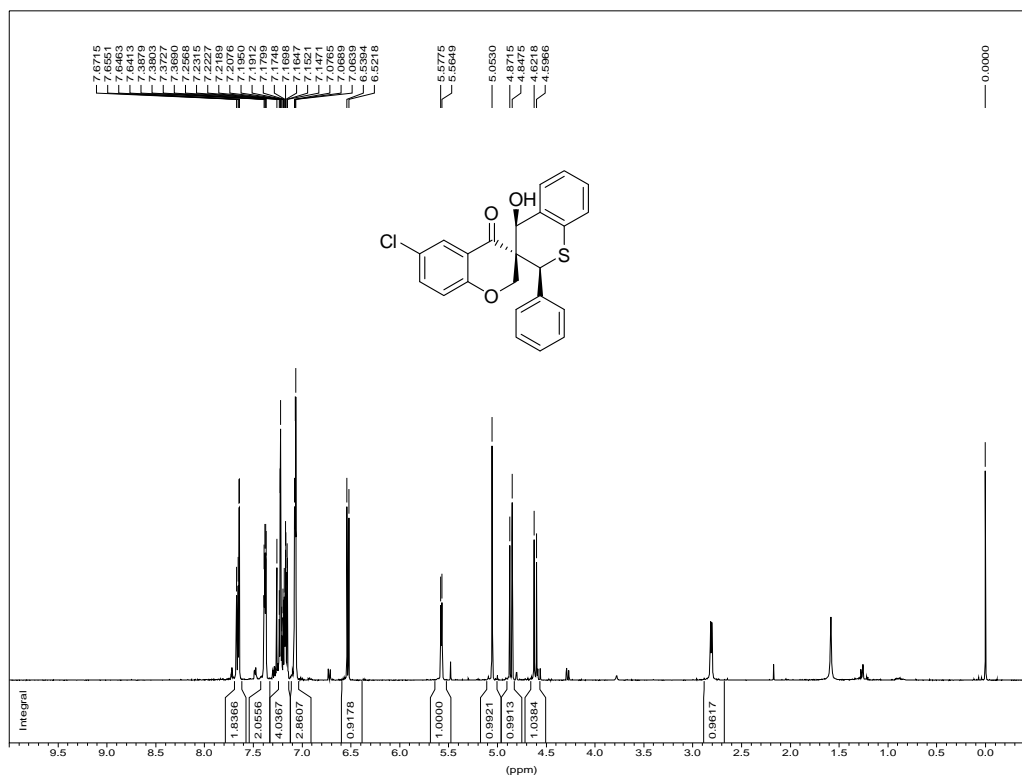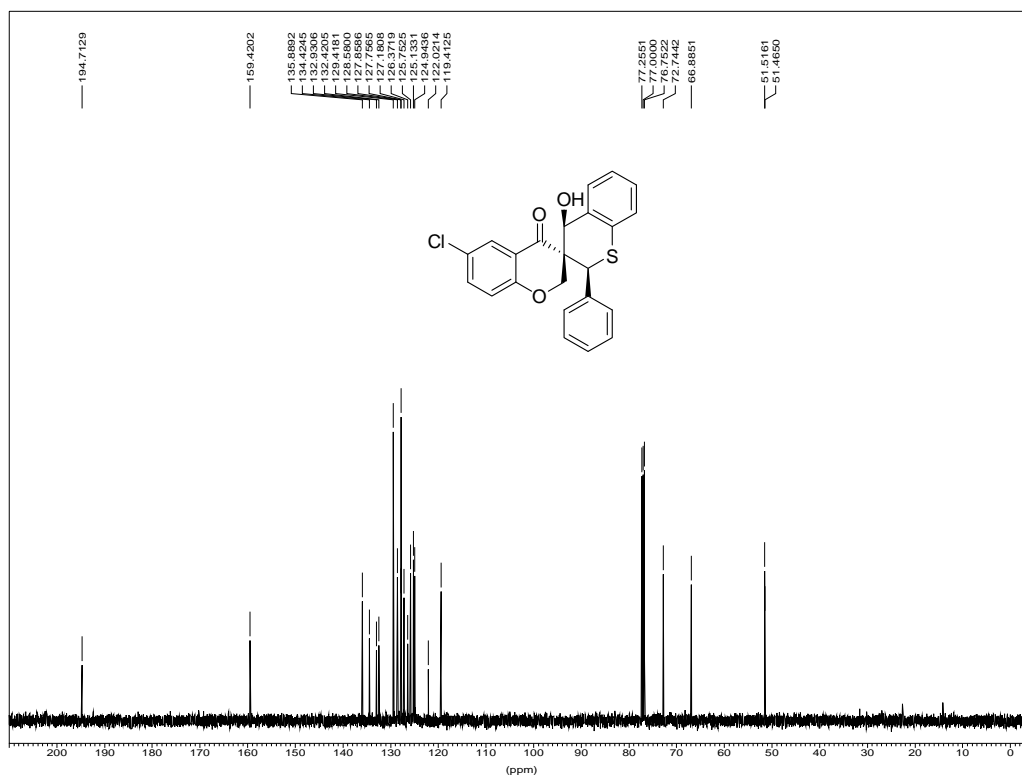

Compound **8w**

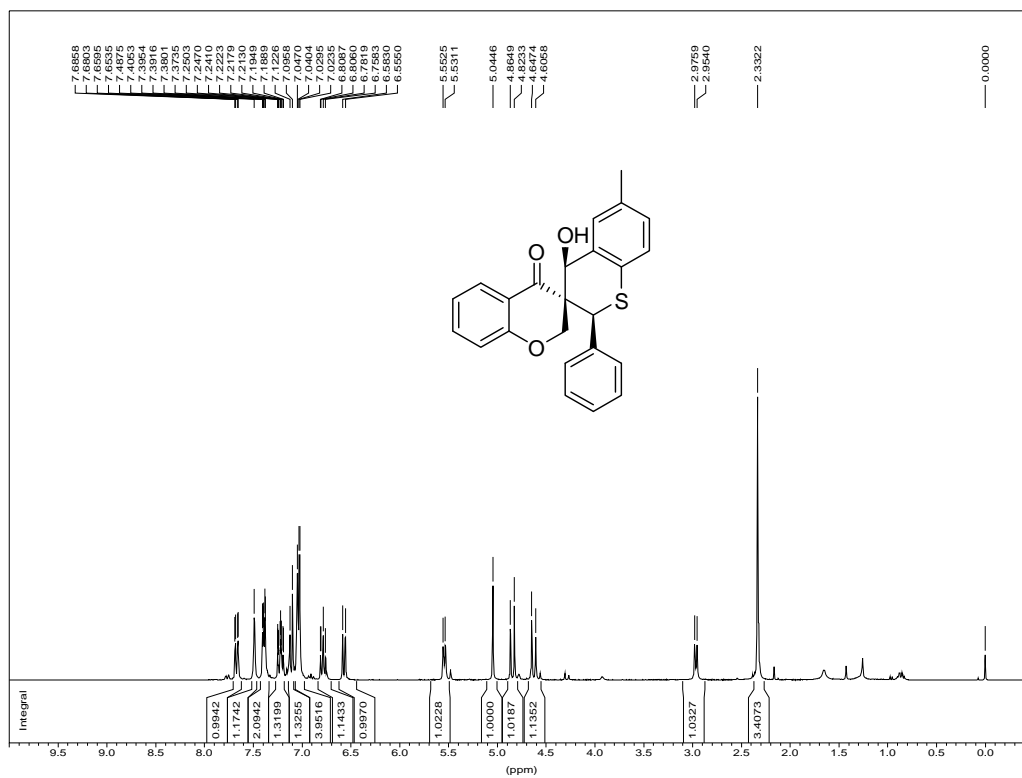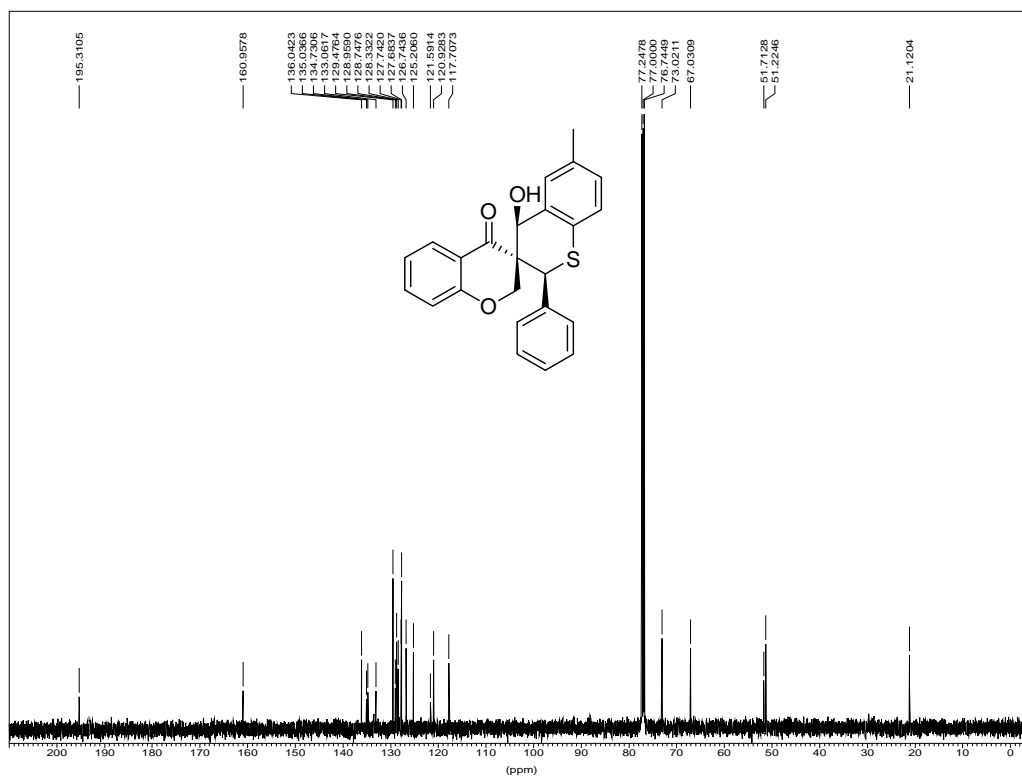



Compound **8x**

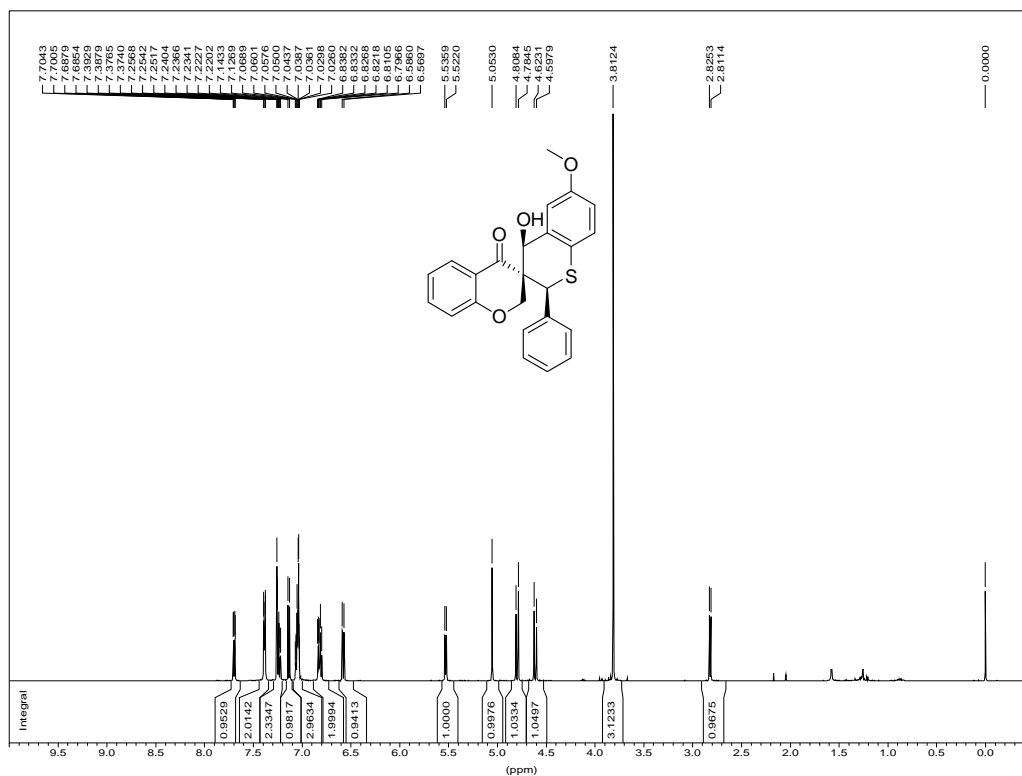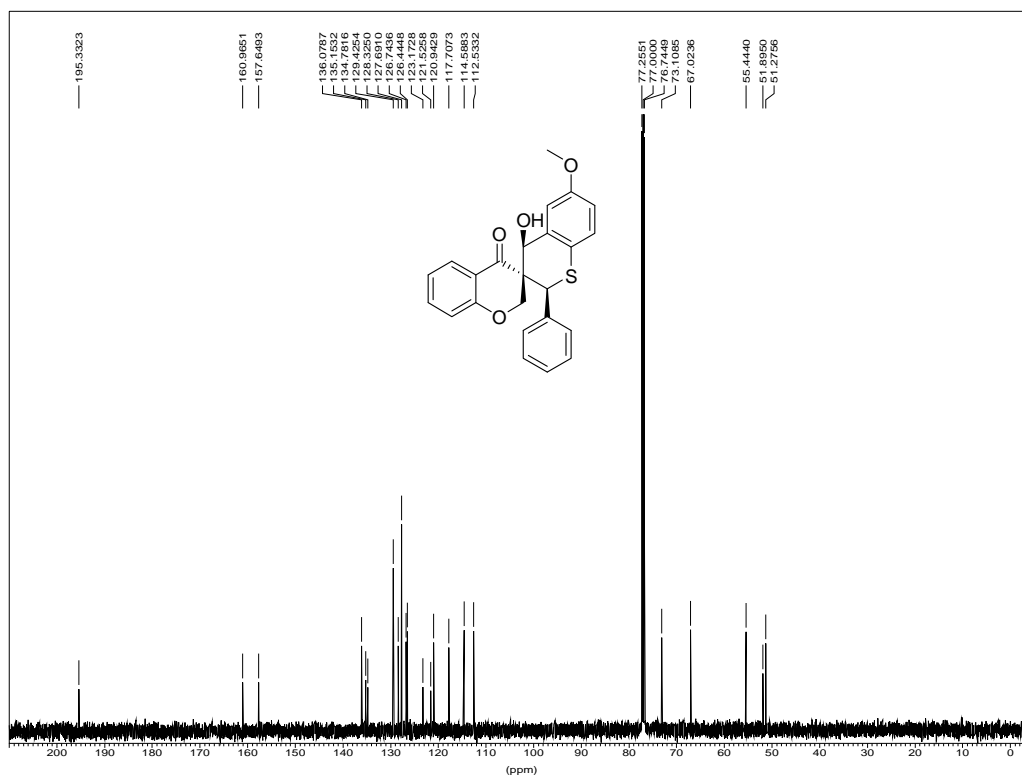

Compound **8y**

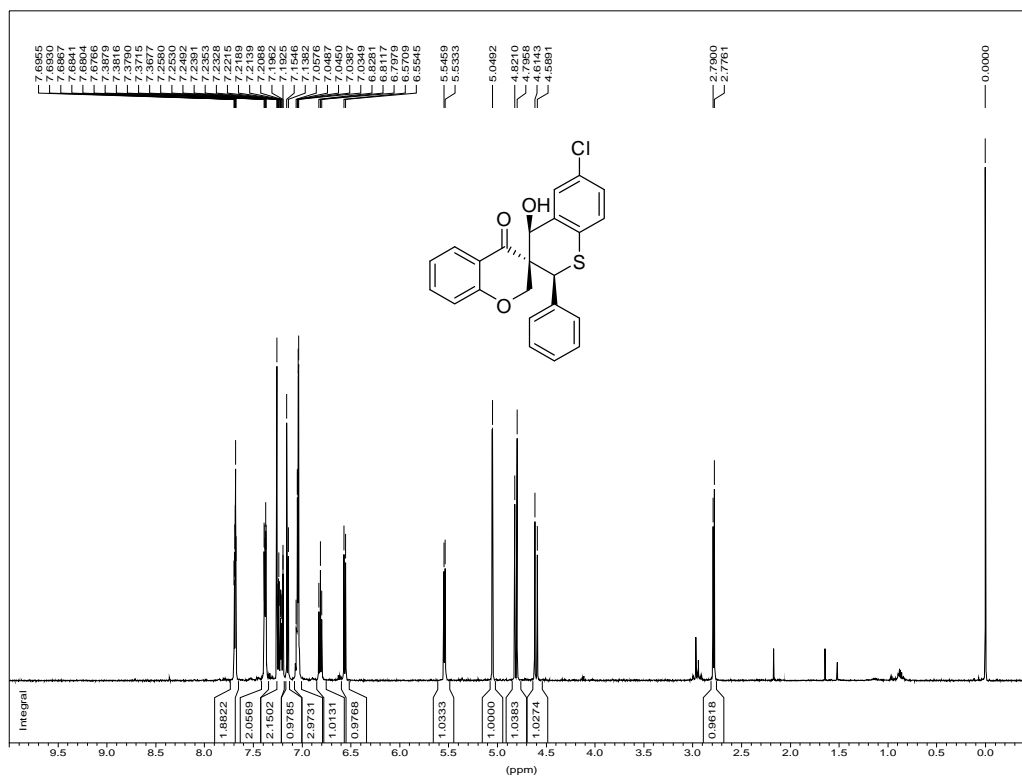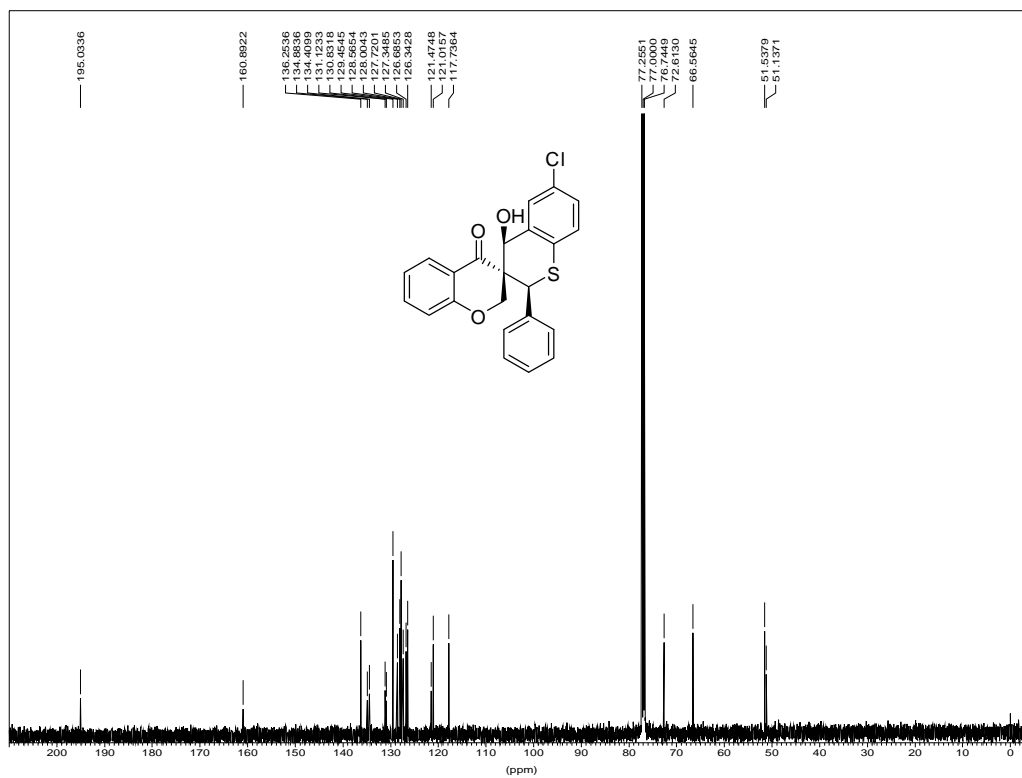

Compound 9

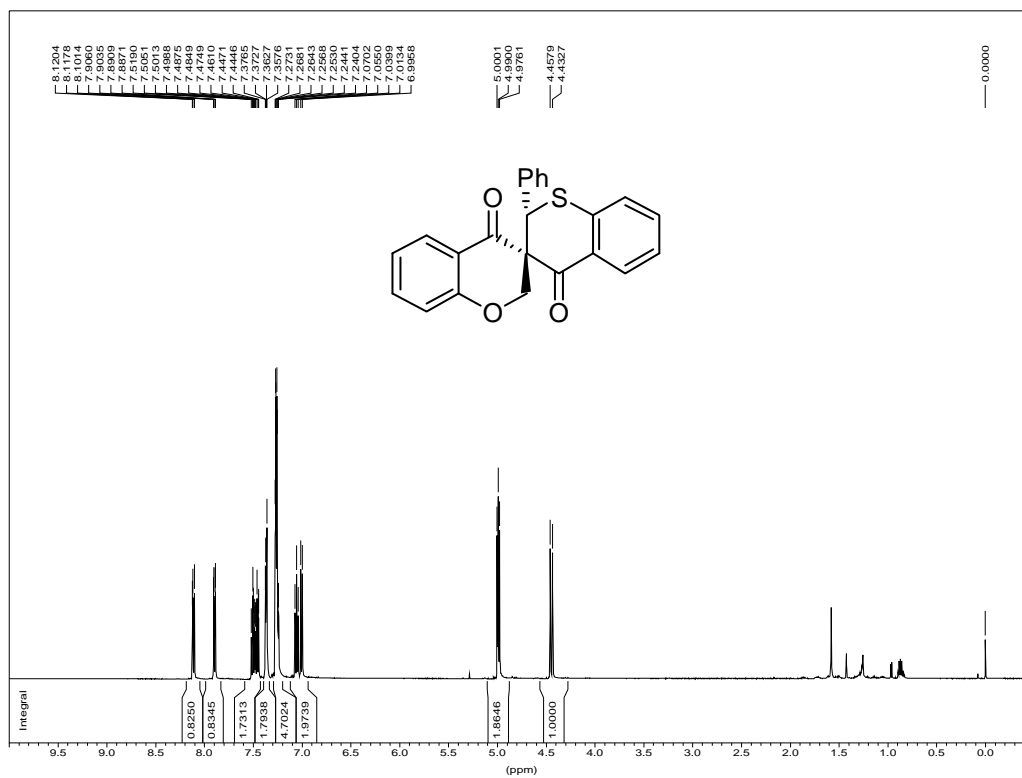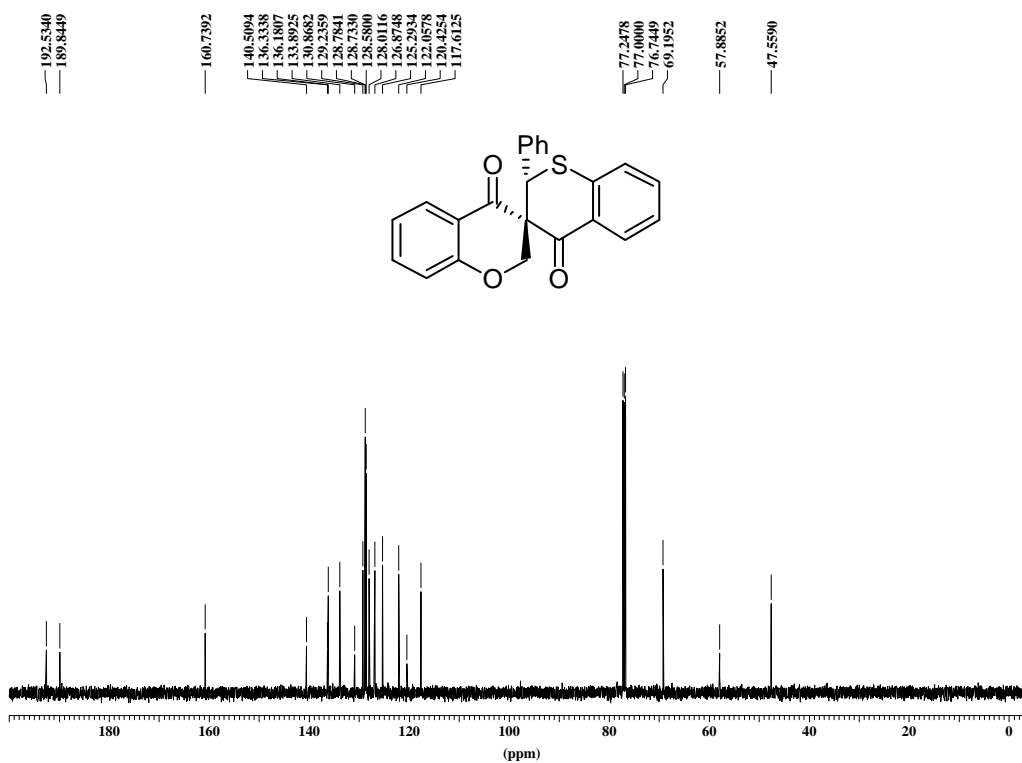

Compound 11

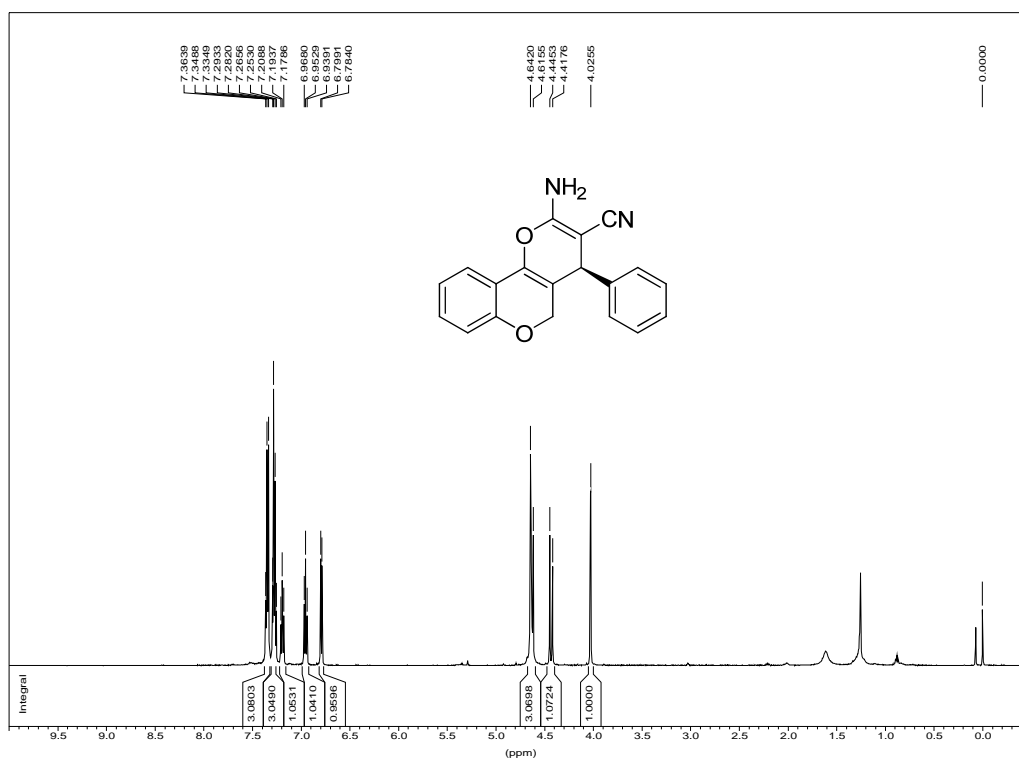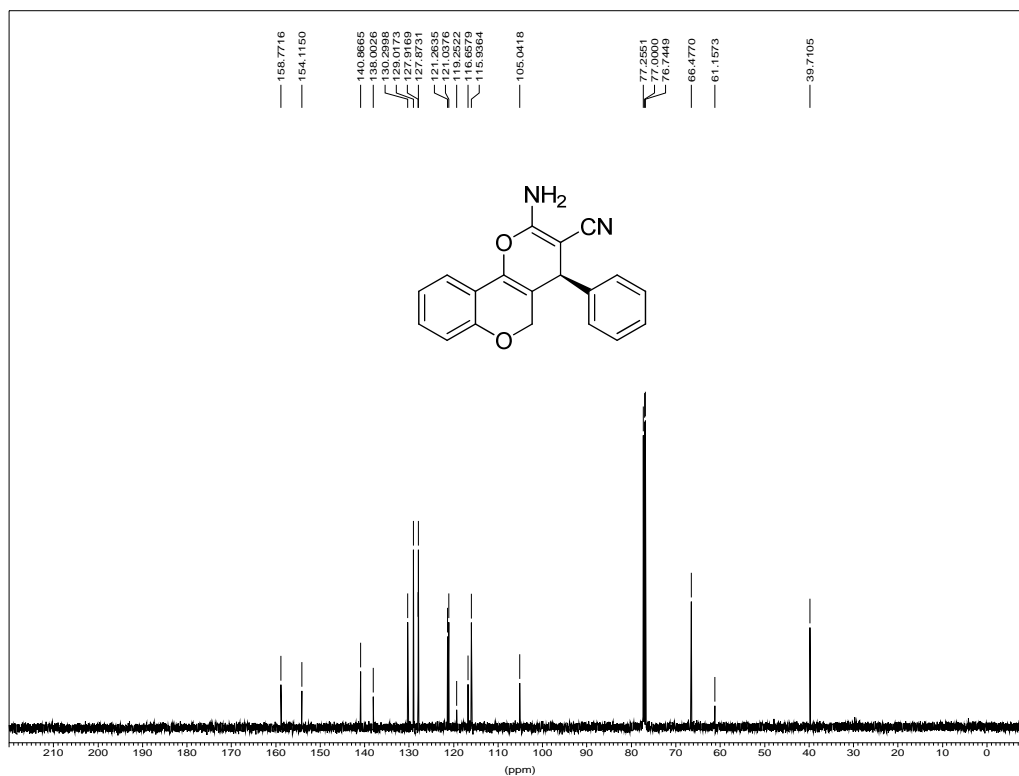

Compound 12

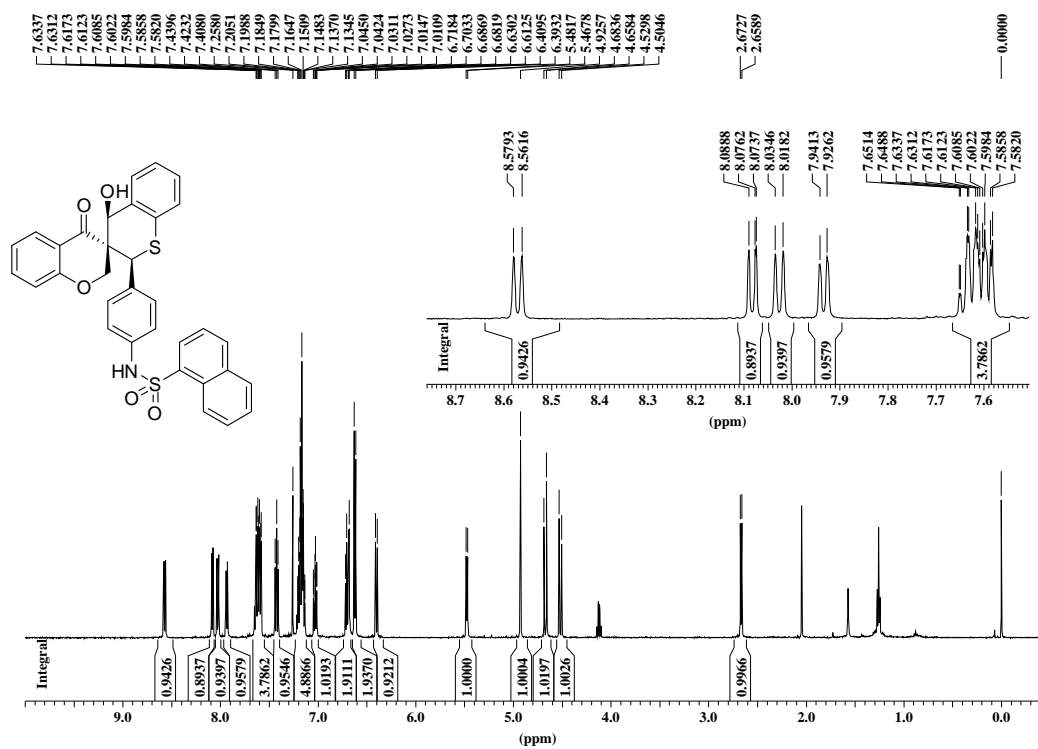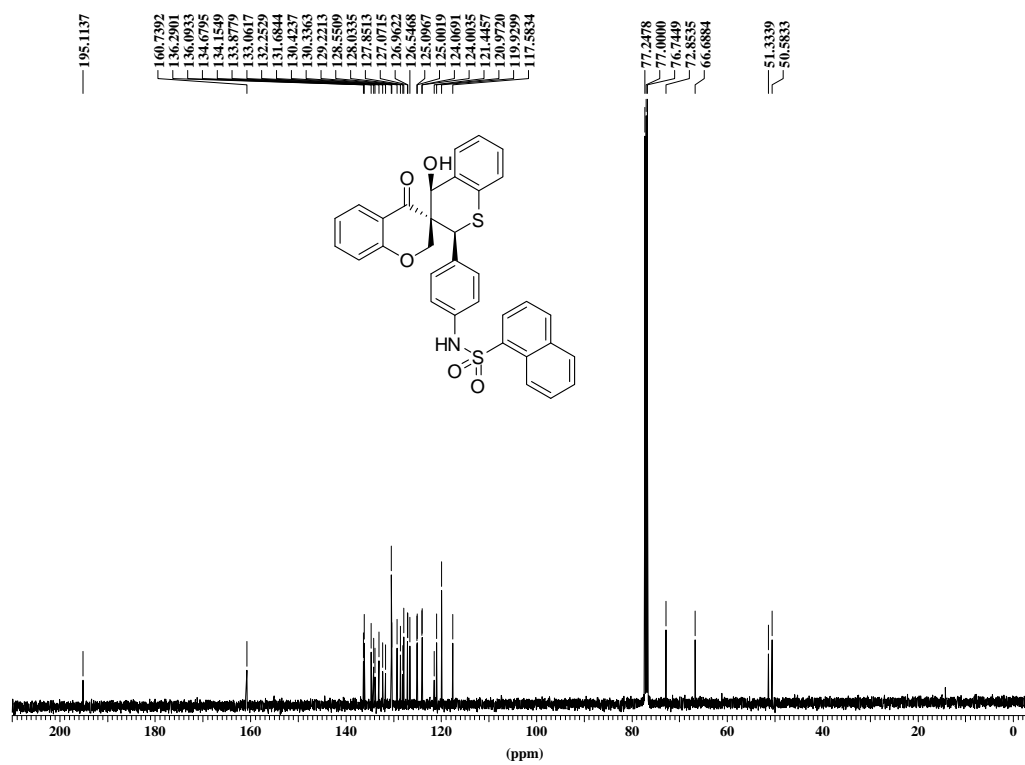

Racemic 8a

==== Shimadzu LCsolution Analysis Report ====

C:\Users\User\Desktop\LC data\Gao Yaojun\G089.lcd

Acquired by : Admin  
Sample Name : GB036P1  
Sample ID : GYJ  
Data File Name : G089.lcd  
Method File Name : 10%IPA, 1ml-min, 60min.lcm  
Batch File Name :  
Report File Name : Default.lcr  
Description : IC column with guard column,10%IPA

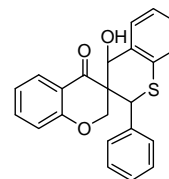

Racemic

Chromatogram

GB036P1 C:\Users\User\Desktop\LC data\Gao Yaojun\G089.lcd

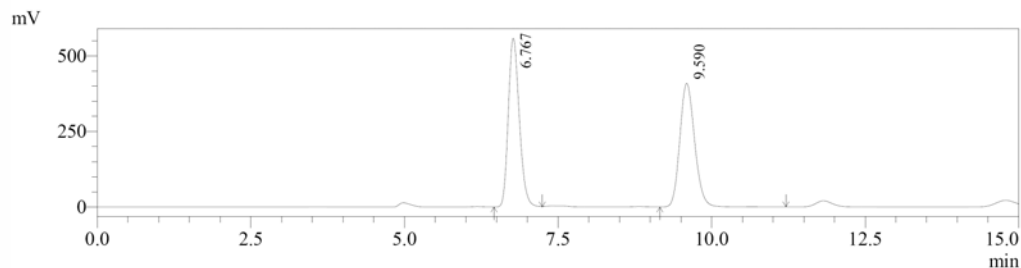

PeakTable

SPD-20A Ch2 254nm

| Peak# | Ret. Time | Area     | Height | Area %  | Height % |
|-------|-----------|----------|--------|---------|----------|
| 1     | 6.767     | 6961214  | 558294 | 50.379  | 57.705   |
| 2     | 9.590     | 6856543  | 409198 | 49.621  | 42.295   |
| Total |           | 13817757 | 967492 | 100.000 | 100.000  |

Enantiomeric enriched 8a

==== Shimadzu LCsolution Analysis Report ====

C:\Users\User\Desktop\LC data\Gao Yaojun\G096.lcd

Acquired by : Admin  
Sample Name : GB044P1- xylene  
Sample ID : GYJ  
Data File Name : G096.lcd  
Method File Name : 10%IPA, 1ml-min, 60min.lcm  
Batch File Name :  
Report File Name : Default.lcr  
Description : IC column with guard column,10%IPA,

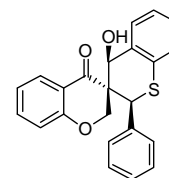

Chromatogram

GB044P1- xylene C:\Users\User\Desktop\LC data\Gao Yaojun\G096.lcd

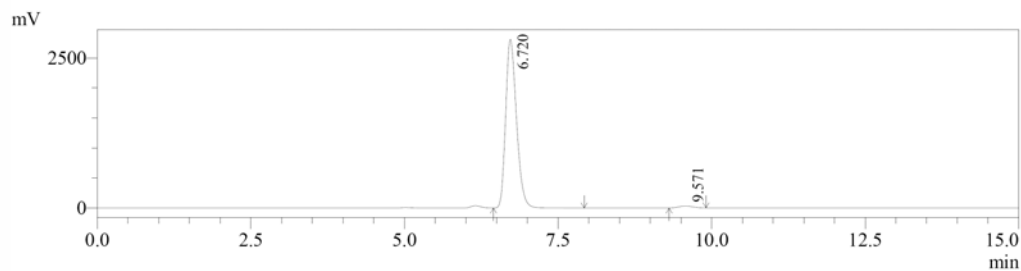

PeakTable

SPD-20A Ch2 254nm

| Peak# | Ret. Time | Area     | Height  | Area %  | Height % |
|-------|-----------|----------|---------|---------|----------|
| 1     | 6.720     | 34413950 | 2811297 | 98.532  | 98.875   |
| 2     | 9.571     | 512696   | 31976   | 1.468   | 1.125    |
| Total |           | 34926645 | 2843273 | 100.000 | 100.000  |

### Racemic **8b**

#### ==== Shimadzu LCsolution Analysis Report ====

C:\Users\User\Desktop\LC data\Gao Yaojun\G115.lcd  
Acquired by : Admin  
Sample Name : GB068P1 recemic  
Sample ID : GYJ  
Data File Name : G115.lcd  
Method File Name : 10%IPA, 1ml-min, 60min.lcm  
Batch File Name :  
Report File Name : Default.lcr  
Description : IC column with guard column, 10%IPA,  
Chromatogram  
GB068P1 recemic C:\Users\User\Desktop\LC data\Gao Yaojun\G115.lcd

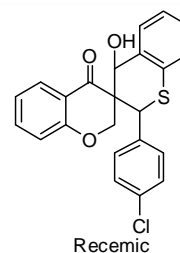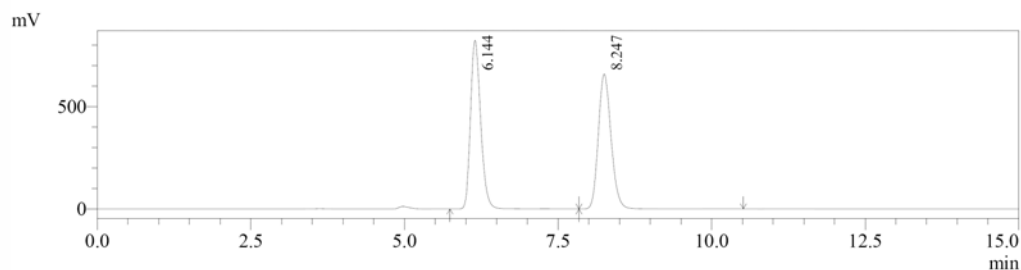

SPD-20A Ch2 254nm

| Peak# | Ret. Time | Area     | Height  | Area %  | Height % |
|-------|-----------|----------|---------|---------|----------|
| 1     | 6.144     | 9529727  | 824123  | 50.049  | 55.553   |
| 2     | 8.247     | 9510944  | 659376  | 49.951  | 44.447   |
| Total |           | 19040671 | 1483500 | 100.000 | 100.000  |

### Enantiomeric enriched **8b**

#### ==== Shimadzu LCsolution Analysis Report ====

C:\Users\User\Desktop\LC data\Gao Yaojun\G122.lcd  
Acquired by : Admin  
Sample Name : GB069P1  
Sample ID : GYJ  
Data File Name : G122.lcd  
Method File Name : 10%IPA, 1ml-min, 60min.lcm  
Batch File Name :  
Report File Name : Default.lcr  
Description : IC column with guard column, 10%IPA  
Chromatogram  
GB069P1 C:\Users\User\Desktop\LC data\Gao Yaojun\G122.lcd

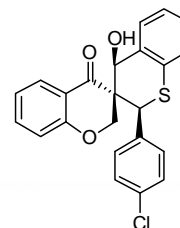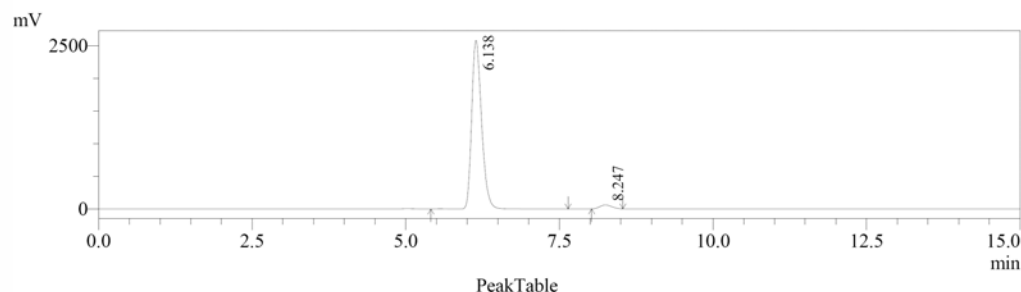

SPD-20A Ch2 254nm

| Peak# | Ret. Time | Area     | Height  | Area %  | Height % |
|-------|-----------|----------|---------|---------|----------|
| 1     | 6.138     | 29104088 | 2586617 | 97.276  | 97.719   |
| 2     | 8.247     | 814947   | 60377   | 2.724   | 2.281    |
| Total |           | 29919035 | 2646994 | 100.000 | 100.000  |

Racemic 8c

==== Shimadzu LCsolution Analysis Report ====

C:\Users\User\Desktop\LC data\Gao Yaojun\G172.lcd

Acquired by : Admin  
Sample Name : GB114P1 recemic  
Sample ID : GYJ  
Data File Name : G172.lcd  
Method File Name : 10%IPA, 1ml-min, 40min.lcm  
Batch File Name :  
Report File Name : Default.lcr  
Description : IC column with guard column, 10%IPA

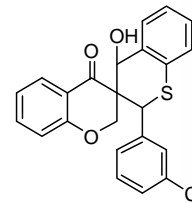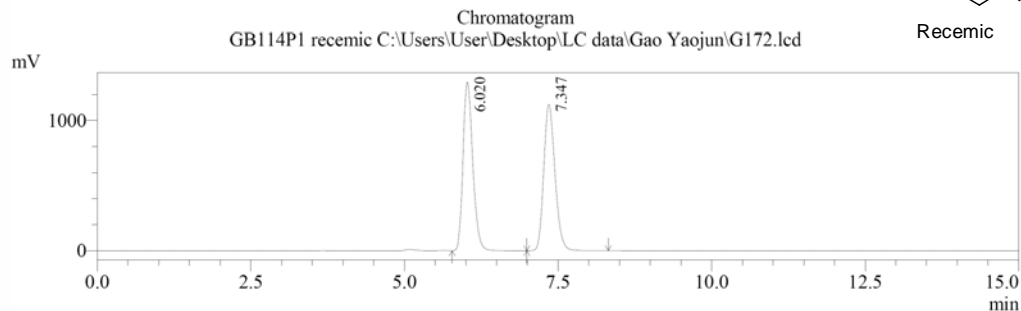

SPD-20A Ch1 254nm

| Peak# | Ret. Time | Area     | Height  | Area %  | Height % |
|-------|-----------|----------|---------|---------|----------|
| 1     | 6.020     | 14301311 | 1296519 | 50.004  | 53.564   |
| 2     | 7.347     | 14299160 | 1123981 | 49.996  | 46.436   |
| Total |           | 28600472 | 2420501 | 100.000 | 100.000  |

Enantiomeric enriched 8c

==== Shimadzu LCsolution Analysis Report ====

C:\Users\User\Desktop\LC data\Gao Yaojun\G194.lcd

Acquired by : Admin  
Sample Name : GB125P1-RT  
Sample ID : GYJ  
Data File Name : G194.lcd  
Method File Name : 10%IPA, 1ml-min, 40min.lcm  
Batch File Name :  
Report File Name : Default.lcr  
Description : IC column with guard column, 10%IPA

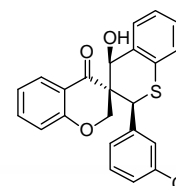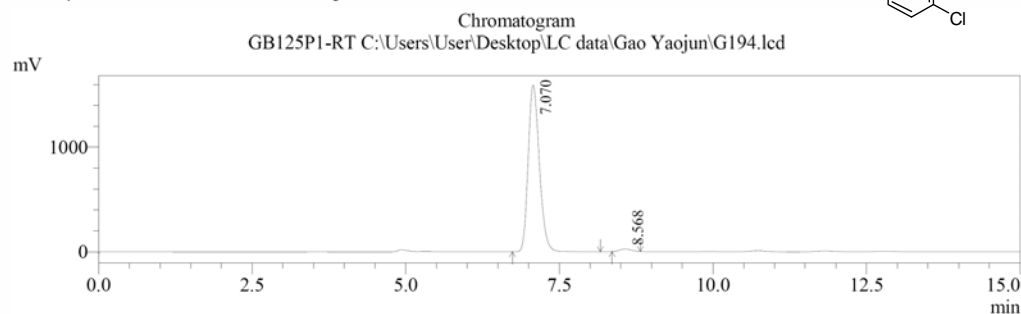

SPD-20A Ch1 254nm

| Peak# | Ret. Time | Area     | Height  | Area %  | Height % |
|-------|-----------|----------|---------|---------|----------|
| 1     | 7.070     | 20216730 | 1596344 | 98.444  | 98.528   |
| 2     | 8.568     | 319454   | 23842   | 1.556   | 1.472    |
| Total |           | 20536184 | 1620186 | 100.000 | 100.000  |



Racemic 8d

==== Shimadzu LCsolution Analysis Report ====

C:\Users\User\Desktop\LC data\Gao Yaojun\G173.lcd  
Acquired by : Admin  
Sample Name : GB115P1 recemic  
Sample ID : GYJ  
Data File Name : G173.lcd  
Method File Name : 10%IPA, 1ml-min, 40min.lcm  
Batch File Name :  
Report File Name : Default.lcr  
Description : IC column with guard column, 10%IPA

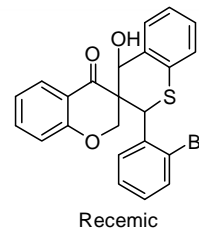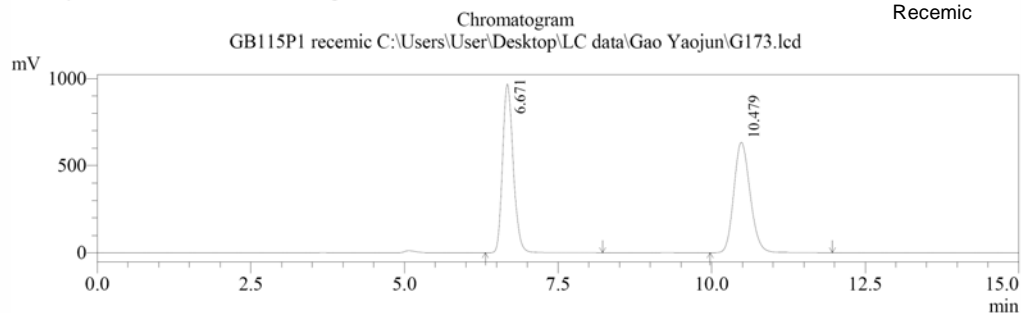

SPD-20A Ch1 254nm

| Peak# | Ret. Time | Area     | Height  | Area %  | Height % |
|-------|-----------|----------|---------|---------|----------|
| 1     | 6.671     | 11708774 | 968306  | 50.028  | 60.445   |
| 2     | 10.479    | 11695767 | 633659  | 49.972  | 39.555   |
| Total |           | 23404541 | 1601965 | 100.000 | 100.000  |

Enantiomeric enriched 8d

==== Shimadzu LCsolution Analysis Report ====

C:\Users\User\Desktop\LC data\Gao Yaojun\G195.lcd  
Acquired by : Admin  
Sample Name : GB126P1  
Sample ID : GYJ  
Data File Name : G195.lcd  
Method File Name : 10%IPA, 1ml-min, 40min.lcm  
Batch File Name :  
Report File Name : Default.lcr  
Description : IC column with guard column, 10%IPA

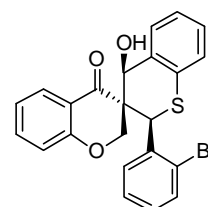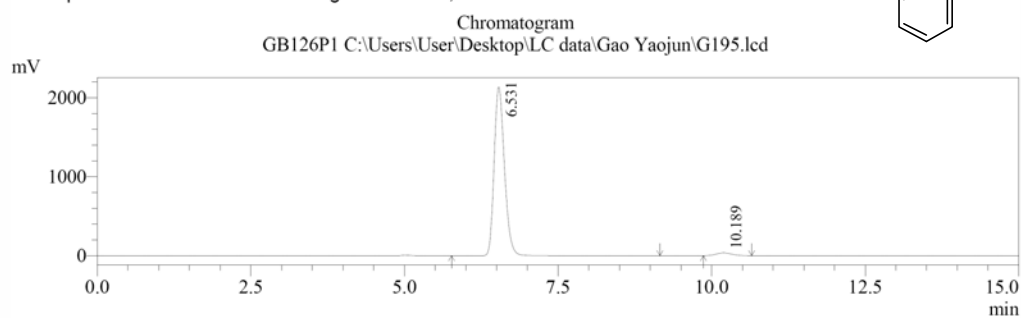

SPD-20A Ch1 254nm

| Peak# | Ret. Time | Area     | Height  | Area %  | Height % |
|-------|-----------|----------|---------|---------|----------|
| 1     | 6.531     | 25026873 | 2138087 | 97.547  | 98.358   |
| 2     | 10.189    | 629339   | 35703   | 2.453   | 1.642    |
| Total |           | 25656212 | 2173790 | 100.000 | 100.000  |

Racemic 8e

==== Shimadzu LCsolution Analysis Report ====

Acquired by : Admin  
Sample Name : GB117P1 recemic  
Sample ID : GYJ  
Data File Name : G178.lcd  
Method File Name : 10%IPA, 1ml-min, 40min.lcm  
Batch File Name :  
Report File Name : Default.lcr  
Description : IC column with guard column  
10%IPA

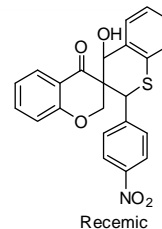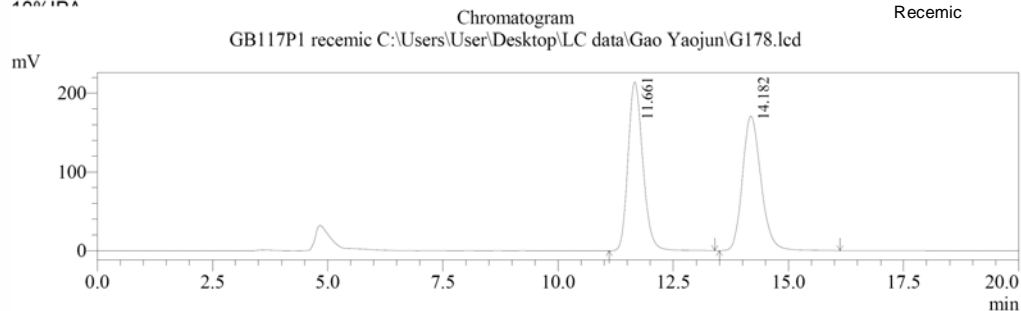

SPD-20A Ch1 254nm

| Peak# | Ret. Time | Area    | Height | Area %  | Height % |
|-------|-----------|---------|--------|---------|----------|
| 1     | 11.661    | 4781995 | 214291 | 50.040  | 55.650   |
| 2     | 14.182    | 4774387 | 170777 | 49.960  | 44.350   |
| Total |           | 9556382 | 385068 | 100.000 | 100.000  |

Enantiomeric enriched 8e

==== Shimadzu LCsolution Analysis Report ====

Acquired by : Admin  
Sample Name : gc027  
Sample ID : gjj  
Data File Name : G274.lcd  
Method File Name : 10%IPA, 1ml-min, 60min.lcm  
Batch File Name :  
Report File Name : Default.lcr  
Description : IC column with guard column,10%IPA

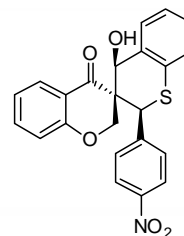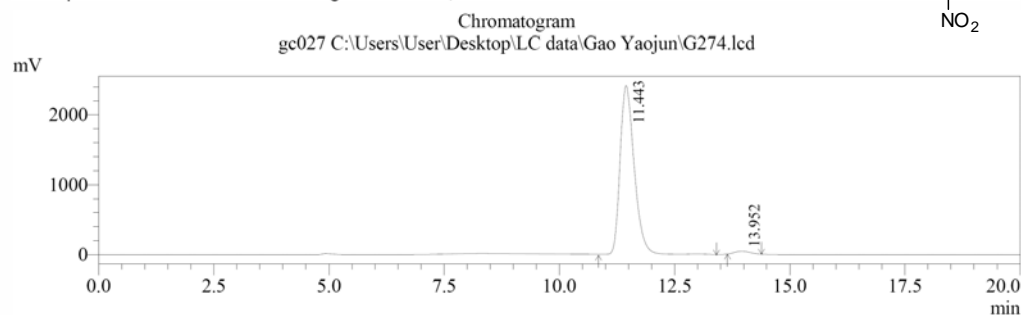

SPD-20A Ch1 254nm

| Peak# | Ret. Time | Area     | Height  | Area %  | Height % |
|-------|-----------|----------|---------|---------|----------|
| 1     | 11.443    | 53167072 | 2428571 | 98.274  | 98.335   |
| 2     | 13.952    | 933708   | 41120   | 1.726   | 1.665    |
| Total |           | 54100780 | 2469690 | 100.000 | 100.000  |

Racemic 8f

==== Shimadzu LCsolution Analysis Report ====

C:\Users\User\Desktop\LC data\Gao Yaojun\G118.lcd  
 Acquired by : Admin  
 Sample Name : GB070P1 recemic  
 Sample ID : GYJ  
 Data File Name : G118.lcd  
 Method File Name : 10%IPA, 1ml-min, 60min.lcm  
 Batch File Name :  
 Report File Name : Default.lcr  
 Description : IC column with guard column, 10%IPA

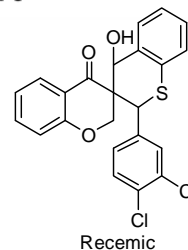

Chromatogram  
 GB070P1 recemic C:\Users\User\Desktop\LC data\Gao Yaojun\G118.lcd

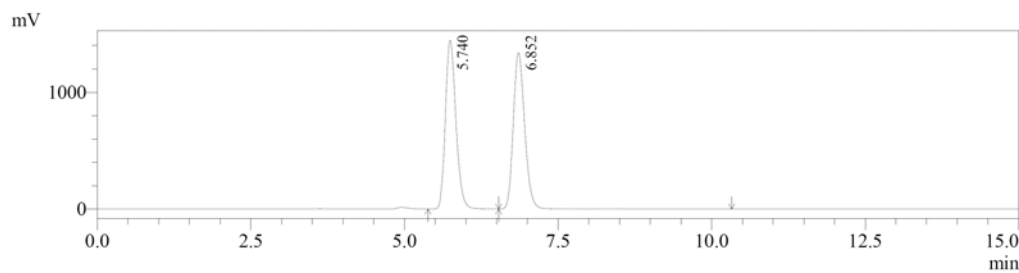

SPD-20A Ch2 254nm

| Peak# | Ret. Time | Area     | Height  | Area %  | Height % |
|-------|-----------|----------|---------|---------|----------|
| 1     | 5.740     | 17217802 | 1445920 | 49.955  | 51.905   |
| 2     | 6.852     | 17248592 | 1339810 | 50.045  | 48.095   |
| Total |           | 34466394 | 2785730 | 100.000 | 100.000  |

Enantiomeric enriched 8f

==== Shimadzu LCsolution Analysis Report ====

C:\Users\User\Desktop\LC data\Gao Yaojun\G123.lcd  
 Acquired by : Admin  
 Sample Name : GB071P1  
 Sample ID : GYJ  
 Data File Name : G123.lcd  
 Method File Name : 10%IPA, 1ml-min, 60min.lcm  
 Batch File Name :  
 Report File Name : Default.lcr  
 Description : IC column with guard column, 10%IPA

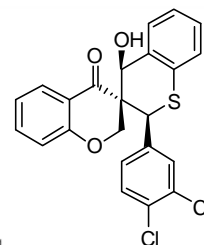

Chromatogram  
 GB071P1 C:\Users\User\Desktop\LC data\Gao Yaojun\G123.lcd

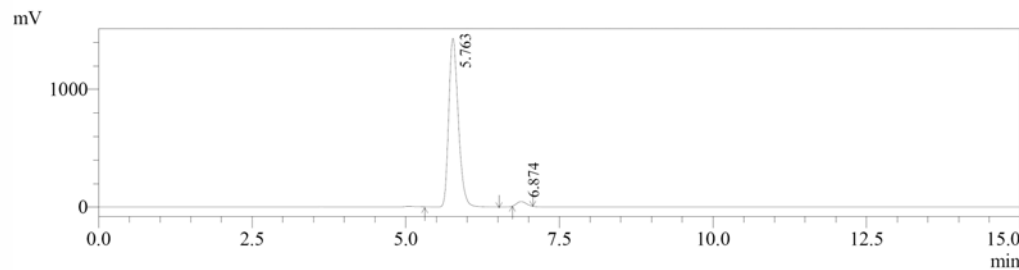

SPD-20A Ch2 254nm

| Peak# | Ret. Time | Area     | Height  | Area %  | Height % |
|-------|-----------|----------|---------|---------|----------|
| 1     | 5.763     | 15951856 | 1441942 | 97.429  | 97.268   |
| 2     | 6.874     | 421002   | 40497   | 2.571   | 2.732    |
| Total |           | 16372858 | 1482438 | 100.000 | 100.000  |

Racemic 8g

==== Shimadzu LCsolution Analysis Report ====

C:\Users\User\Desktop\LC data\Gao Yaojun\G176.lcd  
Acquired by : Admin  
Sample Name : GB116P1 recemic  
Sample ID : GYJ  
Data File Name : G176.lcd  
Method File Name : 10%IPA, 1ml-min, 40min.lcm  
Batch File Name :  
Report File Name : Default.lcr  
Description : IC column with guard column, 10%IPA

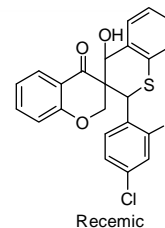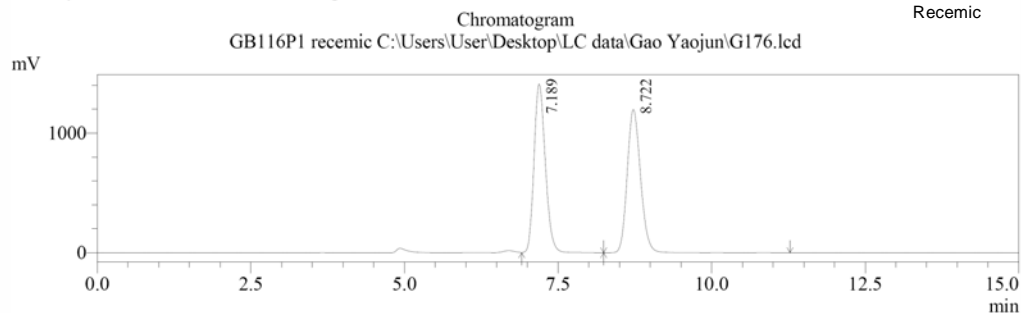

SPD-20A Ch1 254nm

| Peak# | Ret. Time | Area     | Height  | Area %  | Height % |
|-------|-----------|----------|---------|---------|----------|
| 1     | 7.189     | 18097089 | 1410995 | 50.021  | 54.108   |
| 2     | 8.722     | 18081734 | 1196730 | 49.979  | 45.892   |
| Total |           | 36178824 | 2607725 | 100.000 | 100.000  |

Enantiomeric enriched 8g

==== Shimadzu LCsolution Analysis Report ====

C:\Users\User\Desktop\LC data\Gao Yaojun\G199.lcd  
Acquired by : Admin  
Sample Name : GB127P1  
Sample ID : GYJ  
Data File Name : G199.lcd  
Method File Name : 10%IPA, 1ml-min, 40min.lcm  
Batch File Name :  
Report File Name : Default.lcr  
Description : IC column with guard column, 10%IPA

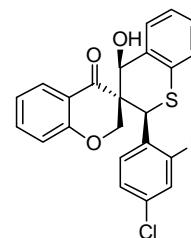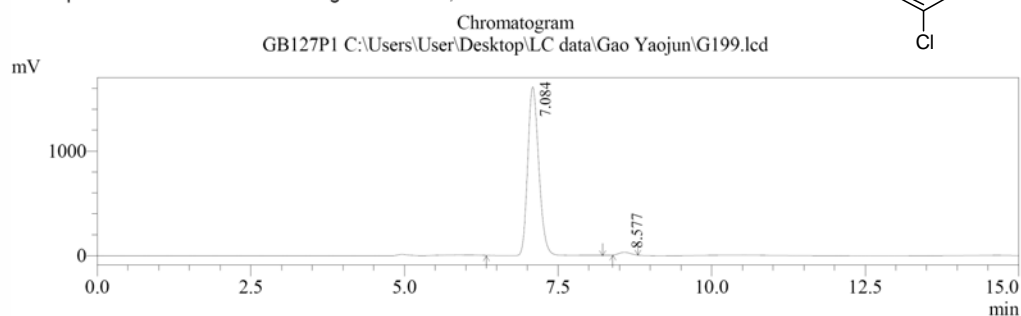

SPD-20A Ch1 254nm

| Peak# | Ret. Time | Area     | Height  | Area %  | Height % |
|-------|-----------|----------|---------|---------|----------|
| 1     | 7.084     | 20546205 | 1613192 | 98.345  | 98.343   |
| 2     | 8.577     | 345845   | 27177   | 1.655   | 1.657    |
| Total |           | 20892051 | 1640370 | 100.000 | 100.000  |

### Racemic 8h

#### ==== Shimadzu LCsolution Analysis Report ====

C:\Users\User\Desktop\LC data\Gao Yaojun\G142.lcd

Acquired by : Admin  
Sample Name : GB093P1  
Sample ID : GYJ  
Data File Name : G142.lcd  
Method File Name : 10%IPA, 1ml-min, 40min.lcm  
Batch File Name :  
Report File Name : Default.lcr  
Description : IC column with guard column, 10%IPA

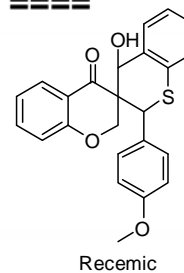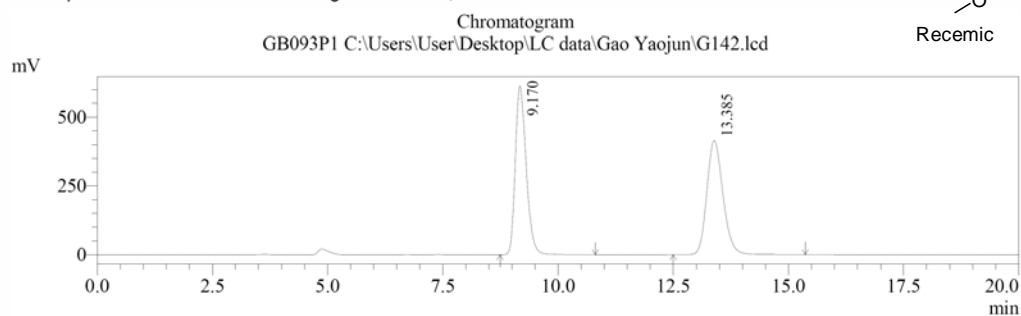

SPD-20A Ch1 254nm

| Peak# | Ret. Time | Area     | Height  | Area %  | Height % |
|-------|-----------|----------|---------|---------|----------|
| 1     | 9.170     | 10066165 | 613019  | 50.017  | 59.659   |
| 2     | 13.385    | 10059176 | 414517  | 49.983  | 40.341   |
| Total |           | 20125341 | 1027537 | 100.000 | 100.000  |

### Enantiomeric enriched 8h

#### ==== Shimadzu LCsolution Analysis Report ====

C:\Users\User\Desktop\LC data\Gao Yaojun\G158.lcd

Acquired by : Admin  
Sample Name : GB108P1  
Sample ID : GYJ  
Data File Name : G158.lcd  
Method File Name : 10%IPA, 1ml-min, 40min.lcm  
Batch File Name :  
Report File Name : Default.lcr  
Description : IC column with guard column, 10%IPA

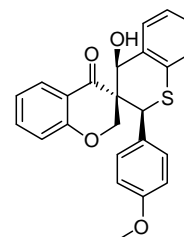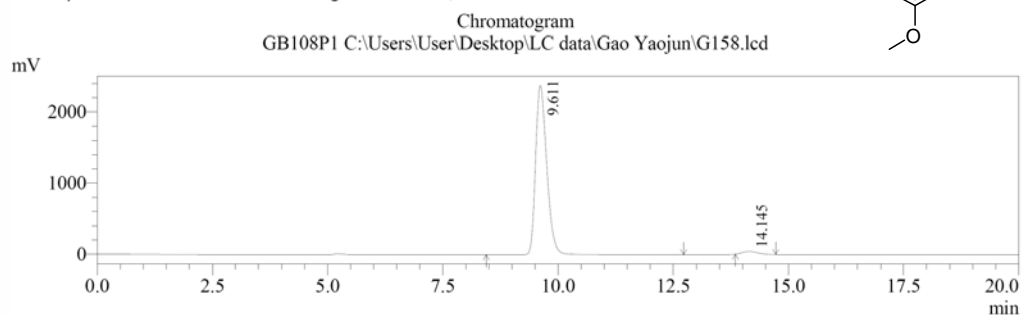

SPD-20A Ch1 254nm

| Peak# | Ret. Time | Area     | Height  | Area %  | Height % |
|-------|-----------|----------|---------|---------|----------|
| 1     | 9.611     | 40437273 | 2378991 | 97.854  | 98.360   |
| 2     | 14.145    | 886668   | 39673   | 2.146   | 1.640    |
| Total |           | 41323940 | 2418665 | 100.000 | 100.000  |

### Racemic **8i**

## ==== Shimadzu LCsolution Analysis Report ====

C:\Users\User\Desktop\LC data\Gao Yaojun\G180.lcd

Acquired by : Admin  
Sample Name : GB118P1 recemic  
Sample ID : GYJ  
Data File Name : G180.lcd  
Method File Name : 10%IPA, 1ml-min, 40min.lcm  
Batch File Name :  
Report File Name : Default.lcr  
Description : IC column with guard column, 10%IPA

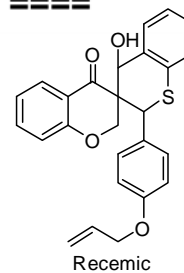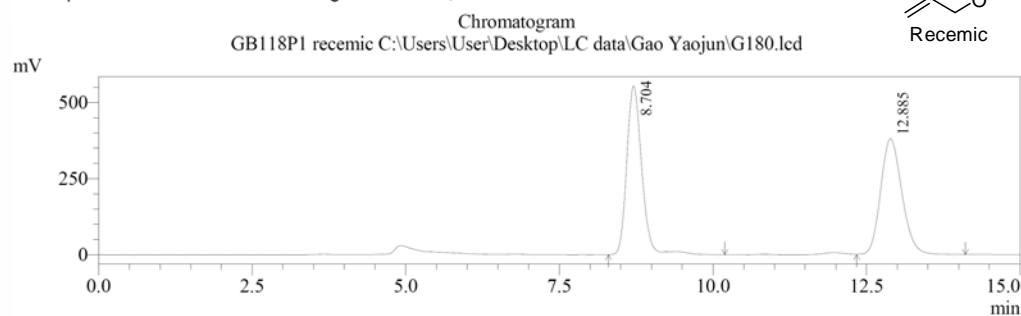

SPD-20A Ch1 254nm

| Peak# | Ret. Time | Area     | Height | Area %  | Height % |
|-------|-----------|----------|--------|---------|----------|
| 1     | 8.704     | 9379188  | 554469 | 50.550  | 59.275   |
| 2     | 12.885    | 9175259  | 380952 | 49.450  | 40.725   |
| Total |           | 18554447 | 935421 | 100.000 | 100.000  |

### Enantiomeric enriched **8i**

## ==== Shimadzu LCsolution Analysis Report ====

C:\Users\User\Desktop\LC data\Gao Yaojun\G200.lcd

Acquired by : Admin  
Sample Name : GB129P1  
Sample ID : GYJ  
Data File Name : G200.lcd  
Method File Name : 10%IPA, 1ml-min, 40min.lcm  
Batch File Name :  
Report File Name : Default.lcr  
Description : IC column with guard column, 10%IPA

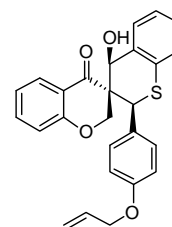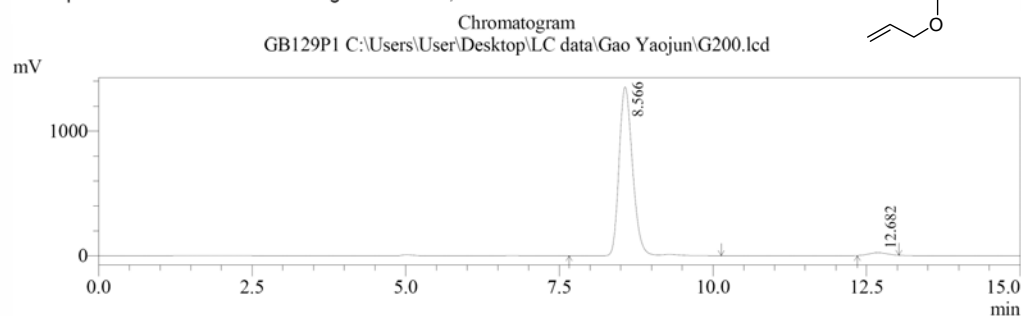

SPD-20A Ch1 254nm

| Peak# | Ret. Time | Area     | Height  | Area %  | Height % |
|-------|-----------|----------|---------|---------|----------|
| 1     | 8.566     | 20854995 | 1355444 | 97.956  | 98.444   |
| 2     | 12.682    | 435269   | 21422   | 2.044   | 1.556    |
| Total |           | 21290265 | 1376866 | 100.000 | 100.000  |

Racemic 8j

==== Shimadzu LCsolution Analysis Report ====

C:\Users\User\Desktop\LC data\Gao Yaojun\G185.lcd

Acquired by : Admin  
 Sample Name : GB121P2 recemic  
 Sample ID : GYJ  
 Data File Name : G185.lcd  
 Method File Name : 10%IPA, 1ml-min, 40min.lcm  
 Batch File Name :  
 Report File Name : Default.lcr  
 Description : IC column with guard column, 10%IPA

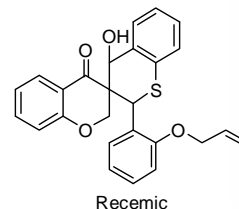

Chromatogram  
 GB121P2 recemic C:\Users\User\Desktop\LC data\Gao Yaojun\G185.lcd

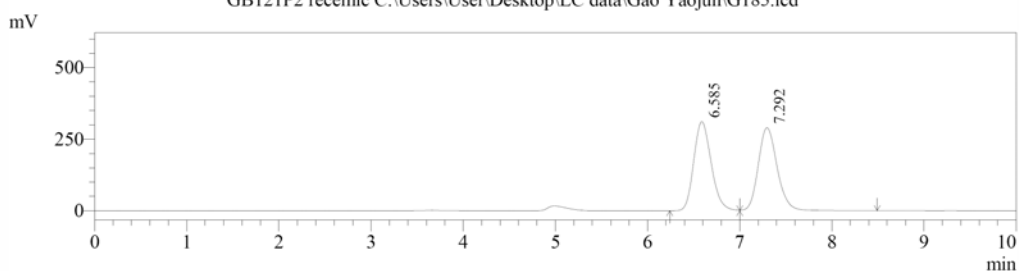

PeakTable

SPD-20A Ch1 254nm

| Peak# | Ret. Time | Area    | Height | Area %  | Height % |
|-------|-----------|---------|--------|---------|----------|
| 1     | 6.585     | 4089327 | 311322 | 49.779  | 51.792   |
| 2     | 7.292     | 4125693 | 289782 | 50.221  | 48.208   |
| Total |           | 8215020 | 601105 | 100.000 | 100.000  |

Enantiomeric enriched 8j

==== Shimadzu LCsolution Analysis Report ====

C:\Users\User\Desktop\LC data\Gao Yaojun\G205.lcd

Acquired by : Admin  
 Sample Name : GB130P1  
 Sample ID : GYJ  
 Data File Name : G205.lcd  
 Method File Name : 10%IPA, 1ml-min, 40min.lcm  
 Batch File Name :  
 Report File Name : Default.lcr  
 Description : IC column with guard column,10%IPA

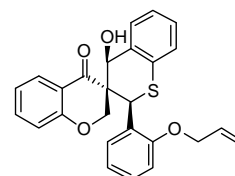

Chromatogram  
 GB130P1 C:\Users\User\Desktop\LC data\Gao Yaojun\G205.lcd

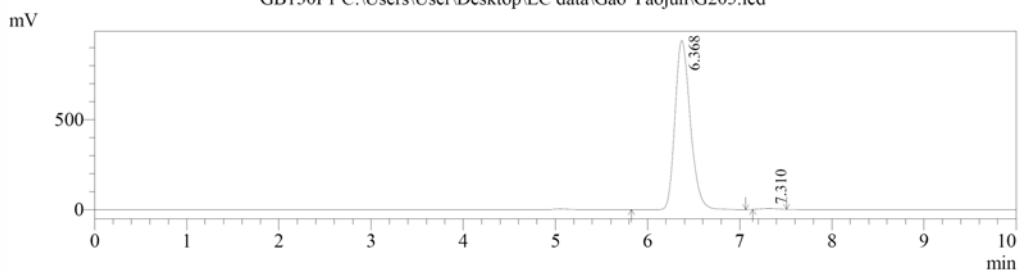

PeakTable

SPD-20A Ch1 254nm

| Peak# | Ret. Time | Area     | Height | Area %  | Height % |
|-------|-----------|----------|--------|---------|----------|
| 1     | 6.368     | 10872308 | 940744 | 99.462  | 99.447   |
| 2     | 7.310     | 58783    | 5227   | 0.538   | 0.553    |
| Total |           | 10931092 | 945971 | 100.000 | 100.000  |

Racemic 8k

==== Shimadzu LCsolution Analysis Report ====

C:\Users\User\Desktop\LC data\Gao Yaojun\G184.lcd  
Acquired by : Admin  
Sample Name : GB121P1 recemic  
Sample ID : GYJ  
Data File Name : G184.lcd  
Method File Name : 10%IPA, 1ml-min, 40min.lcm  
Batch File Name :  
Report File Name : Default.lcr  
Description : IC column with guard column,10%IPA

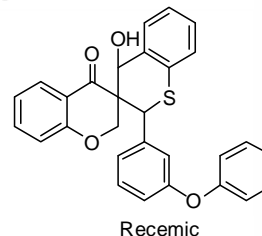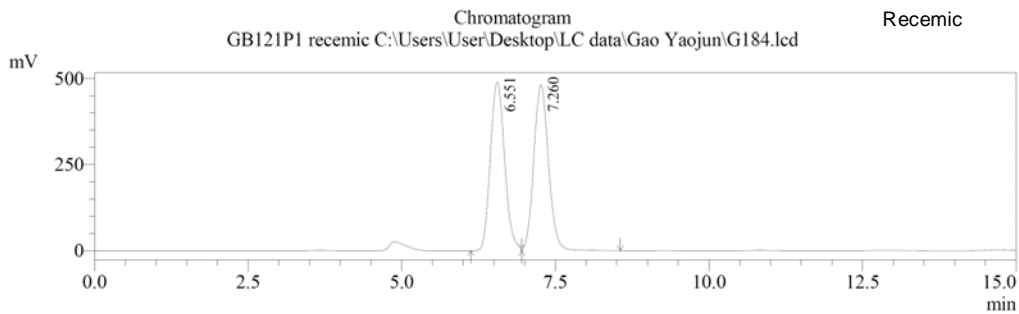

SPD-20A Ch1 254nm

| Peak# | Ret. Time | Area     | Height | Area %  | Height % |
|-------|-----------|----------|--------|---------|----------|
| 1     | 6.551     | 7897129  | 489936 | 49.591  | 50.444   |
| 2     | 7.260     | 8027488  | 481315 | 50.409  | 49.556   |
| Total |           | 15924618 | 971251 | 100.000 | 100.000  |

Enantiomeric enriched 8k

==== Shimadzu LCsolution Analysis Report ====

C:\Users\User\Desktop\LC data\Gao Yaojun\G207.lcd  
Acquired by : Admin  
Sample Name : GB132P1  
Sample ID : GYJ  
Data File Name : G207.lcd  
Method File Name : 10%IPA, 1ml-min, 40min.lcm  
Batch File Name :  
Report File Name : Default.lcr  
Description : IC column with guard column,10%IPA

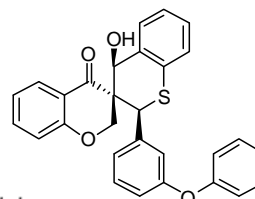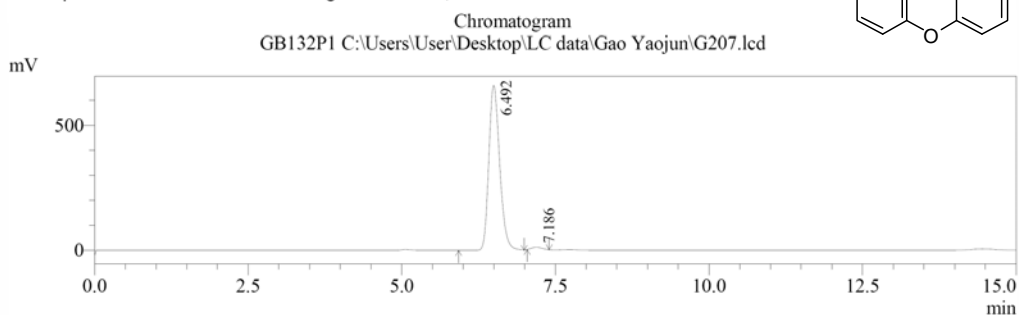

SPD-20A Ch1 254nm

| Peak# | Ret. Time | Area    | Height | Area %  | Height % |
|-------|-----------|---------|--------|---------|----------|
| 1     | 6.492     | 8175488 | 660598 | 98.723  | 98.602   |
| 2     | 7.186     | 105725  | 9368   | 1.277   | 1.398    |
| Total |           | 8281213 | 669965 | 100.000 | 100.000  |



Racemic 8l

==== Shimadzu LCsolution Analysis Report ====

C:\Users\User\Desktop\LC data\Gao Yaojun\G144.lcd

Acquired by : Admin  
Sample Name : GB094P1  
Sample ID : GYJ  
Data File Name : G144.lcd  
Method File Name : 10%IPA, 1ml-min, 40min.lcm  
Batch File Name :  
Report File Name : Default.lcr  
Description : IC column with guard column,10%IPA

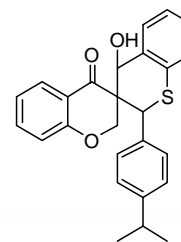

Racemic

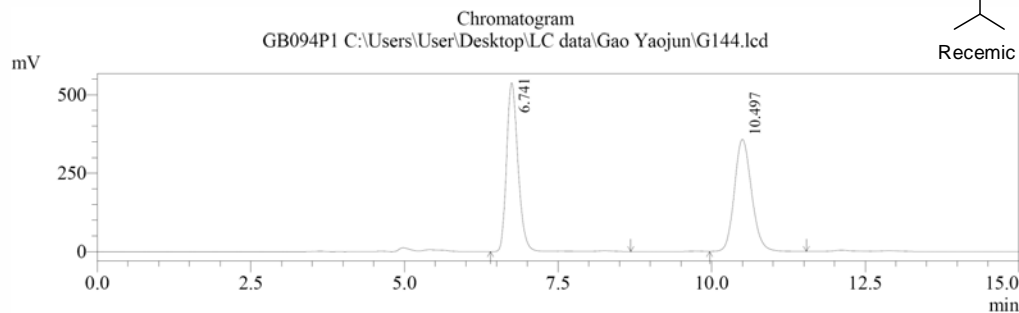

SPD-20A Ch1 254nm

| Peak# | Ret. Time | Area     | Height | Area %  | Height % |
|-------|-----------|----------|--------|---------|----------|
| 1     | 6.741     | 6959883  | 537213 | 49.954  | 60.040   |
| 2     | 10.497    | 6972665  | 357548 | 50.046  | 39.960   |
| Total |           | 13932547 | 894761 | 100.000 | 100.000  |

Enantiomeric enriched 8l

==== Shimadzu LCsolution Analysis Report ====

C:\Users\User\Desktop\LC data\Gao Yaojun\G162.lcd

Acquired by : Admin  
Sample Name : GB109P1  
Sample ID : GYJ  
Data File Name : G162.lcd  
Method File Name : 10%IPA, 1ml-min, 40min.lcm  
Batch File Name :  
Report File Name : Default.lcr  
Description : IC column with guard column, 10%IPA

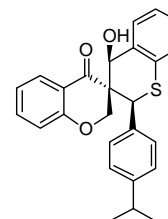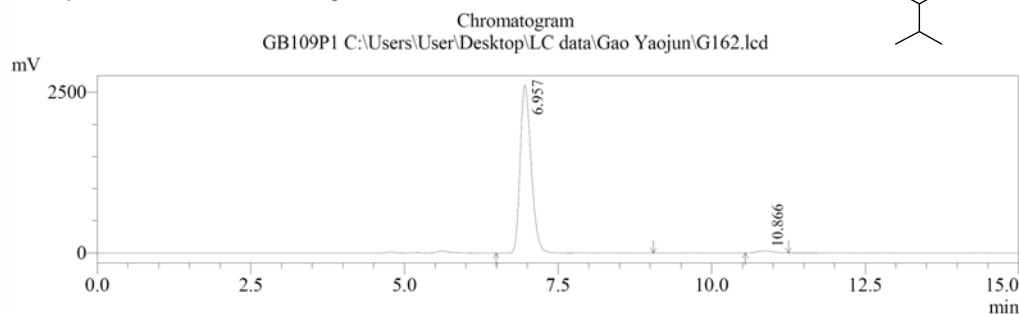

SPD-20A Ch1 254nm

| Peak# | Ret. Time | Area     | Height  | Area %  | Height % |
|-------|-----------|----------|---------|---------|----------|
| 1     | 6.957     | 32658116 | 2612274 | 98.298  | 98.817   |
| 2     | 10.866    | 565553   | 31285   | 1.702   | 1.183    |
| Total |           | 33223668 | 2643559 | 100.000 | 100.000  |

Racemic 8m

==== Shimadzu LCsolution Analysis Report ====

C:\Users\User\Desktop\LC data\Gao Yaojun\G140.lcd

Acquired by : Admin  
Sample Name : GB089P1 recemic  
Sample ID : GYJ  
Data File Name : G140.lcd  
Method File Name : 10%IPA, 1ml-min, 40min.lcm  
Batch File Name :  
Report File Name : Default.lcr  
Description : IC column with guard column,10%IPA

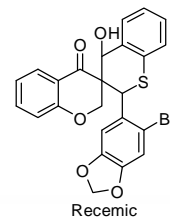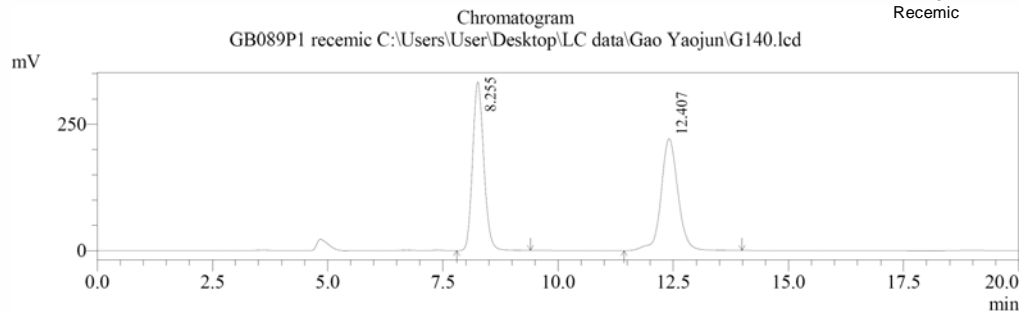

SPD-20A Ch1 254nm

| Peak# | Ret. Time | Area     | Height | Area %  | Height % |
|-------|-----------|----------|--------|---------|----------|
| 1     | 8.255     | 5633316  | 333763 | 50.020  | 60.128   |
| 2     | 12.407    | 5628906  | 221323 | 49.980  | 39.872   |
| Total |           | 11262222 | 555086 | 100.000 | 100.000  |

Enantiomeric enriched 8m

==== Shimadzu LCsolution Analysis Report ====

C:\Users\User\Desktop\LC data\Gao Yaojun\G159.lcd

Acquired by : Admin  
Sample Name : GB107P1  
Sample ID : GYJ  
Data File Name : G159.lcd  
Method File Name : 10%IPA, 1ml-min, 40min.lcm  
Batch File Name :  
Report File Name : Default.lcr  
Description : IC column with guard column,10%IPA

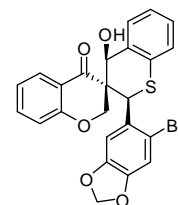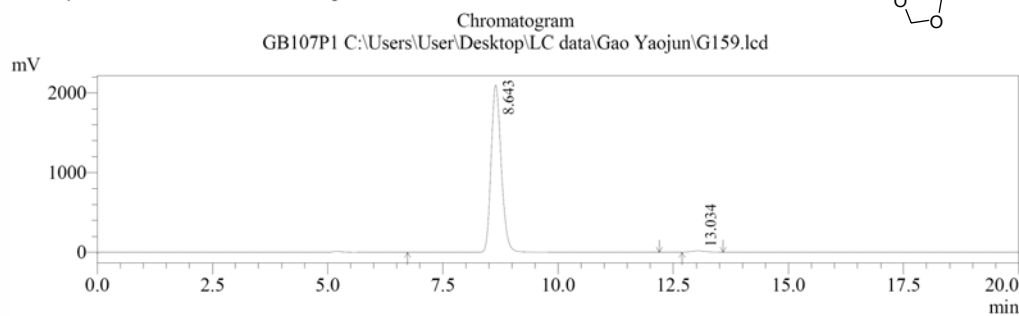

SPD-20A Ch1 254nm

| Peak# | Ret. Time | Area     | Height  | Area %  | Height % |
|-------|-----------|----------|---------|---------|----------|
| 1     | 8.643     | 32412379 | 2101082 | 98.849  | 99.215   |
| 2     | 13.034    | 377511   | 16616   | 1.151   | 0.785    |
| Total |           | 32789890 | 2117697 | 100.000 | 100.000  |

### Racemic **8n**

## ==== Shimadzu LCsolution Analysis Report ====

C:\Users\User\Desktop\LC data\Gao Yaojun\G186.lcd  
Acquired by : Admin  
Sample Name : GB122P1 recemic  
Sample ID : GYJ  
Data File Name : G186.lcd  
Method File Name : 10%IPA, 1ml-min, 40min.lcm  
Batch File Name :  
Report File Name : Default.lcr  
Description : IC column with guard column, 10%IPA

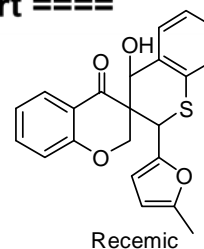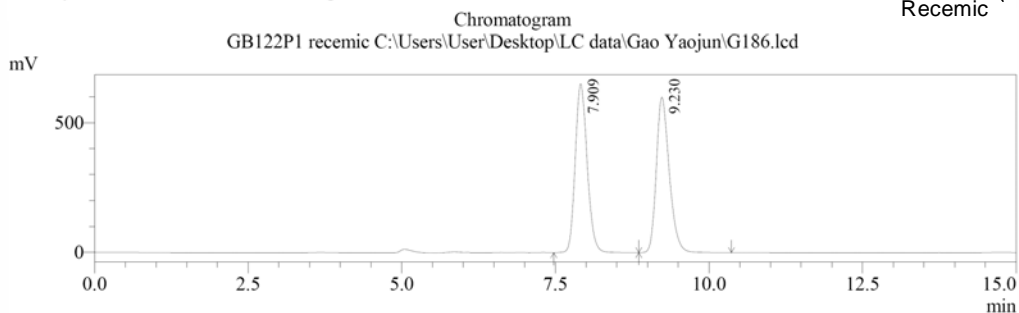

SPD-20A Ch1 254nm

| Peak# | Ret. Time | Area     | Height  | Area %  | Height % |
|-------|-----------|----------|---------|---------|----------|
| 1     | 7.909     | 8813322  | 649707  | 50.097  | 52.047   |
| 2     | 9.230     | 8779030  | 598596  | 49.903  | 47.953   |
| Total |           | 17592353 | 1248303 | 100.000 | 100.000  |

### Enantiomeric enriched **8n**

## ==== Shimadzu LCsolution Analysis Report ====

C:\Users\User\Desktop\LC data\Gao Yaojun\G208.lcd  
Acquired by : Admin  
Sample Name : GB133P1  
Sample ID : GYJ  
Data File Name : G208.lcd  
Method File Name : 10%IPA, 1ml-min, 40min.lcm  
Batch File Name :  
Report File Name : Default.lcr  
Description : IC column with guard column, 10%IPA

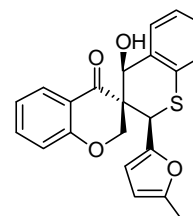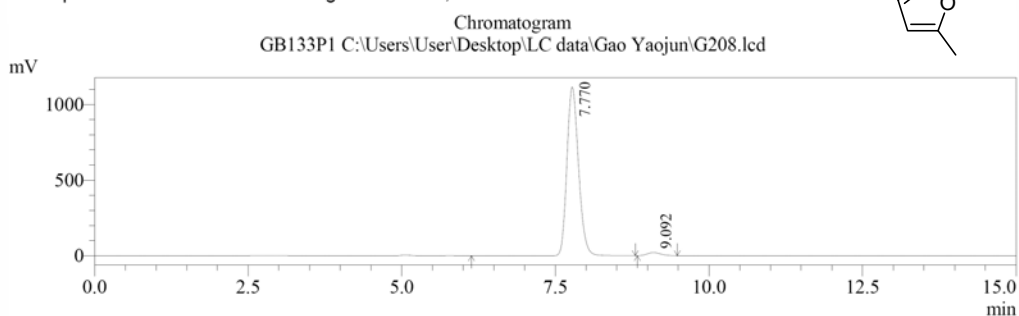

SPD-20A Ch1 254nm

| Peak# | Ret. Time | Area     | Height  | Area %  | Height % |
|-------|-----------|----------|---------|---------|----------|
| 1     | 7.770     | 14711567 | 1116520 | 97.967  | 98.184   |
| 2     | 9.092     | 305284   | 20656   | 2.033   | 1.816    |
| Total |           | 15016851 | 1137176 | 100.000 | 100.000  |

Racemic 8o

==== Shimadzu LCsolution Analysis Report ====

C:\Users\User\Desktop\LC data\Gao Yaojun\G189.lcd

Acquired by : Admin  
Sample Name : GB123P1 recemic  
Sample ID : GYJ  
Data File Name : G189.lcd  
Method File Name : 10%IPA, 1ml-min, 40min.lcm  
Batch File Name :  
Report File Name : Default.lcr  
Description : IC column with guard column, 10%IPA

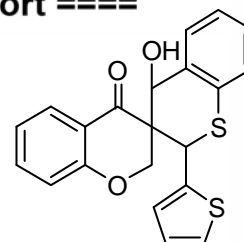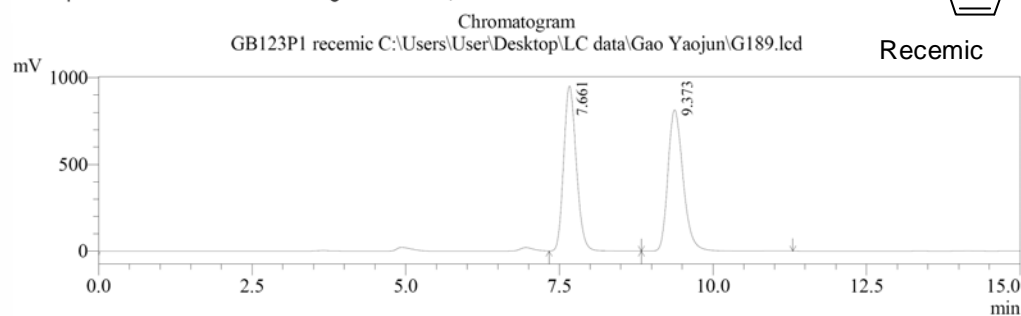

SPD-20A Ch1 254nm

| Peak# | Ret. Time | Area     | Height  | Area %  | Height % |
|-------|-----------|----------|---------|---------|----------|
| 1     | 7.661     | 13628899 | 952684  | 49.351  | 53.895   |
| 2     | 9.373     | 13987432 | 814969  | 50.649  | 46.105   |
| Total |           | 27616330 | 1767653 | 100.000 | 100.000  |

Enantiomeric enriched 8o

==== Shimadzu LCsolution Analysis Report ====

C:\Users\User\Desktop\LC data\Gao Yaojun\G209.lcd

Acquired by : Admin  
Sample Name : GB134P1  
Sample ID : GYJ  
Data File Name : G209.lcd  
Method File Name : 10%IPA, 1ml-min, 40min.lcm  
Batch File Name :  
Report File Name : Default.lcr  
Description : IC column with guard column, 10%IPA

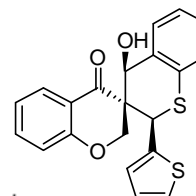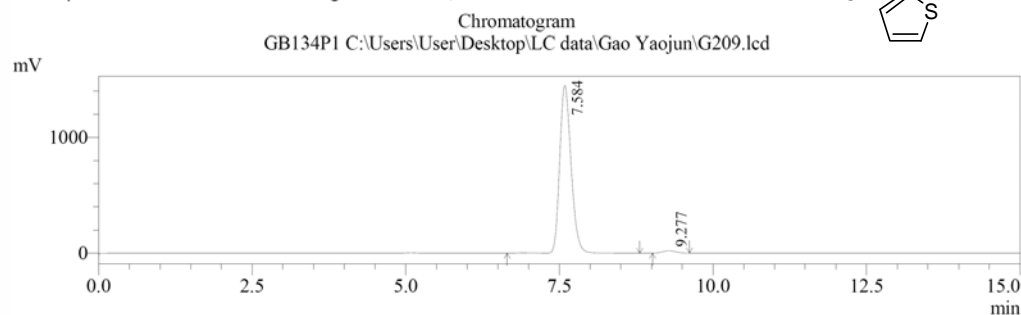

SPD-20A Ch1 254nm

| Peak# | Ret. Time | Area     | Height  | Area %  | Height % |
|-------|-----------|----------|---------|---------|----------|
| 1     | 7.584     | 18817095 | 1448897 | 98.423  | 98.657   |
| 2     | 9.277     | 301475   | 19718   | 1.577   | 1.343    |
| Total |           | 19118570 | 1468615 | 100.000 | 100.000  |

Racemic 8p

==== Shimadzu LCsolution Analysis Report ====

C:\Users\User\Desktop\LC data\Gao Yaojun\G183.lcd  
Acquired by : Admin  
Sample Name : GB120P1 recemic  
Sample ID : GYJ  
Data File Name : G183.lcd  
Method File Name : 10%IPA, 1ml-min, 40min.lcm  
Batch File Name :  
Report File Name : Default.lcr  
Description : IC column with guard column, 10%IPA

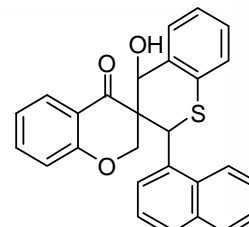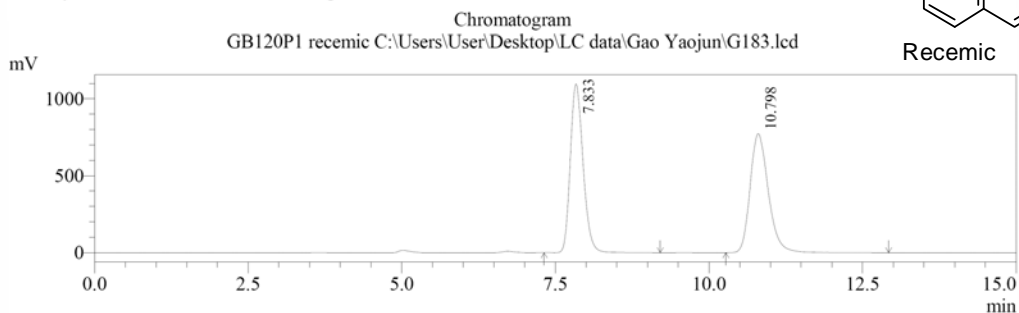

PeakTable

| Peak# | Ret. Time | Area     | Height  | Area %  | Height % |
|-------|-----------|----------|---------|---------|----------|
| 1     | 7.833     | 15880134 | 1096682 | 49.859  | 58.645   |
| 2     | 10.798    | 15969791 | 773361  | 50.141  | 41.355   |
| Total |           | 31849926 | 1870043 | 100.000 | 100.000  |

Enantiomeric enriched 8p

==== Shimadzu LCsolution Analysis Report ====

C:\Users\User\Desktop\LC data\Gao Yaojun\G206.lcd  
Acquired by : Admin  
Sample Name : GB131P1  
Sample ID : GYJ  
Data File Name : G206.lcd  
Method File Name : 10%IPA, 1ml-min, 40min.lcm  
Batch File Name :  
Report File Name : Default.lcr  
Description : IC column with guard column,10%IPA

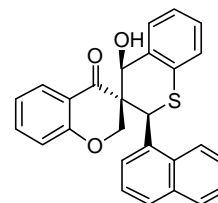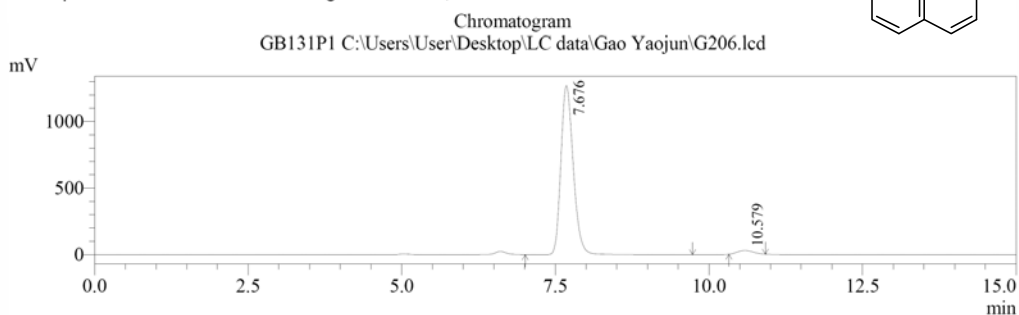

PeakTable

| Peak# | Ret. Time | Area     | Height  | Area %  | Height % |
|-------|-----------|----------|---------|---------|----------|
| 1     | 7.676     | 17875952 | 1271406 | 97.327  | 97.866   |
| 2     | 10.579    | 490942   | 27722   | 2.673   | 2.134    |
| Total |           | 18366893 | 1299128 | 100.000 | 100.000  |

Racemic 8g

==== Shimadzu LCsolution Analysis Report ====

C:\Users\User\Desktop\LC data\Gao Yaojun\G228.lcd

Acquired by : Admin  
Sample Name : gb156p1 recemic  
Sample ID : gyj  
Data File Name : G228.lcd  
Method File Name : 5%IPA, 1ml-min, 60min.lcm  
Batch File Name :  
Report File Name : Default.lcr  
Description : lb column with guard column,5%IPA

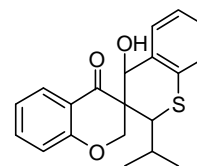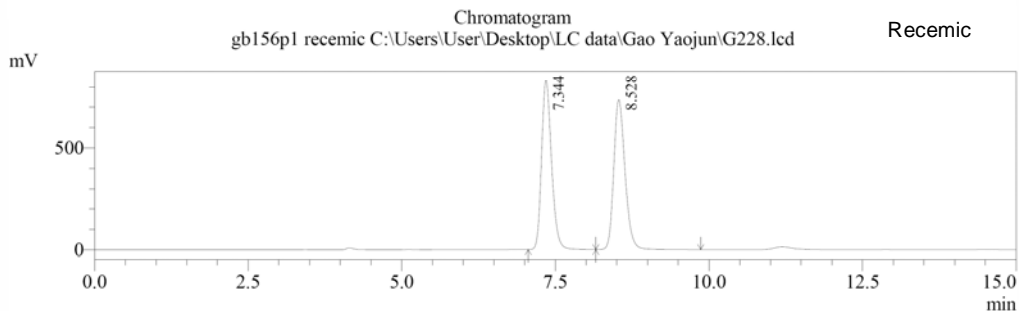

SPD-20A Ch1 254nm

| Peak# | Ret. Time | Area     | Height  | Area %  | Height % |
|-------|-----------|----------|---------|---------|----------|
| 1     | 7.344     | 9403875  | 831047  | 50.045  | 52.978   |
| 2     | 8.528     | 9386815  | 737619  | 49.955  | 47.022   |
| Total |           | 18790690 | 1568666 | 100.000 | 100.000  |

Enantiomeric enriched 8g

==== Shimadzu LCsolution Analysis Report ====

C:\Users\User\Desktop\LC data\Gao Yaojun\G229.lcd

Acquired by : Admin  
Sample Name : gb158p1  
Sample ID : gyj  
Data File Name : G229.lcd  
Method File Name : 5%IPA, 1ml-min, 60min.lcm  
Batch File Name :  
Report File Name : Default.lcr  
Description : lb column with guard column,5%IPA

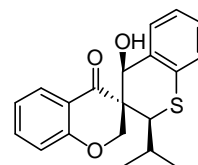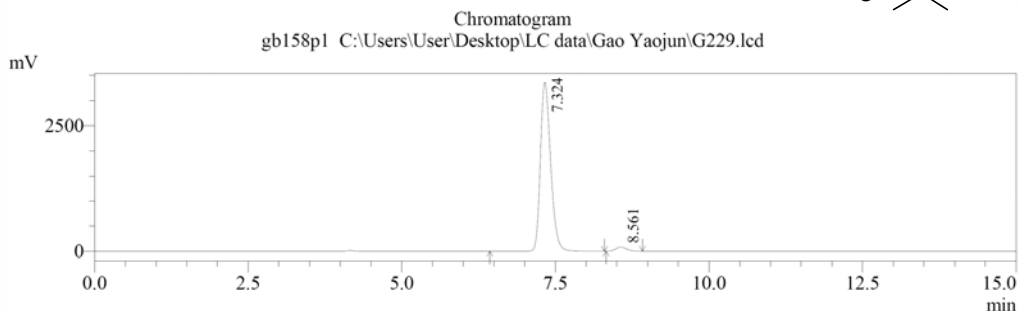

SPD-20A Ch1 254nm

| Peak# | Ret. Time | Area     | Height  | Area %  | Height % |
|-------|-----------|----------|---------|---------|----------|
| 1     | 7.324     | 39151754 | 3354159 | 97.523  | 97.655   |
| 2     | 8.561     | 994452   | 80527   | 2.477   | 2.345    |
| Total |           | 40146207 | 3434686 | 100.000 | 100.000  |

Racemic 8r

==== Shimadzu LCsolution Analysis Report ====

C:\Users\User\Desktop\LC data\Gao Yaojun\G225.lcd

Acquired by : Admin  
Sample Name : gb157p1 recemic  
Sample ID : gyj  
Data File Name : G225.lcd  
Method File Name : 10%IPA, 1ml-min, 40min.lcm  
Batch File Name :  
Report File Name : Default.lcr  
Description : lc column with guard column,10%IPA

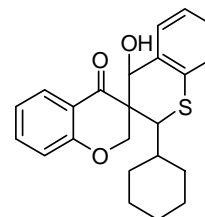

Racemic

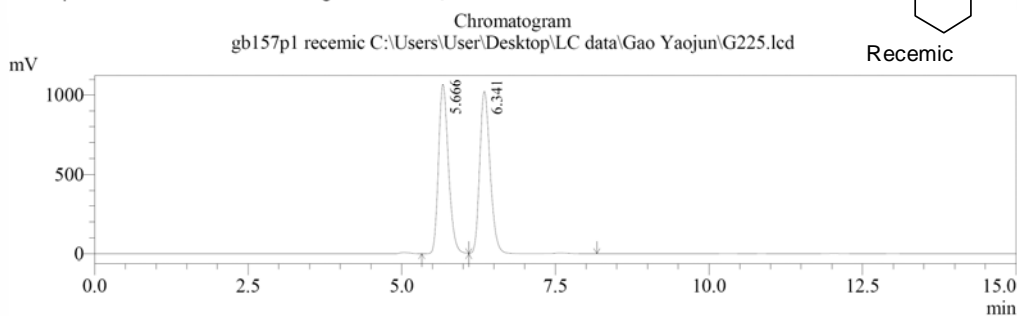

PeakTable

| Peak# | Ret. Time | Area     | Height  | Area %  | Height % |
|-------|-----------|----------|---------|---------|----------|
| 1     | 5.666     | 12015031 | 1065903 | 49.875  | 51.048   |
| 2     | 6.341     | 12075262 | 1022142 | 50.125  | 48.952   |
| Total |           | 24090293 | 2088045 | 100.000 | 100.000  |

Enantiomeric enriched 8r

==== Shimadzu LCsolution Analysis Report ====

C:\Users\User\Desktop\LC data\Gao Yaojun\G226.lcd

Acquired by : Admin  
Sample Name : gb159p1  
Sample ID : gyj  
Data File Name : G226.lcd  
Method File Name : 10%IPA, 1ml-min, 40min.lcm  
Batch File Name :  
Report File Name : Default.lcr  
Description : lc column with guard column,10%IPA

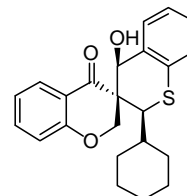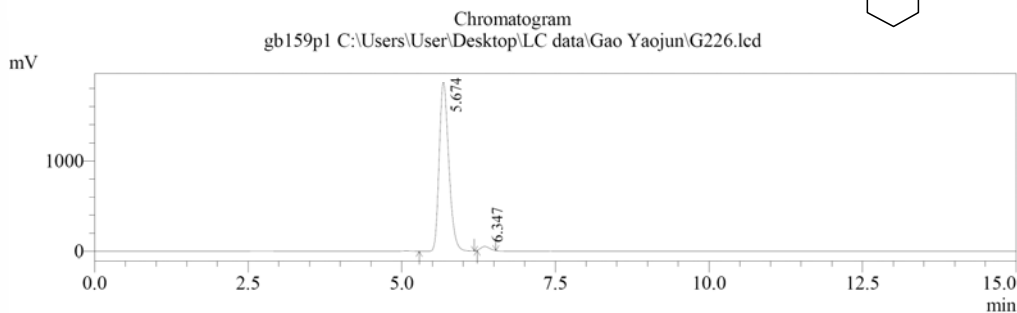

PeakTable

| Peak# | Ret. Time | Area     | Height  | Area %  | Height % |
|-------|-----------|----------|---------|---------|----------|
| 1     | 5.674     | 20394000 | 1865298 | 97.988  | 97.725   |
| 2     | 6.347     | 418738   | 43430   | 2.012   | 2.275    |
| Total |           | 20812738 | 1908728 | 100.000 | 100.000  |

Racemic 8s

==== Shimadzu LCsolution Analysis Report ====

C:\Users\User\Desktop\LC data\Gao Yaojun\G125.lcd  
Acquired by : Admin  
Sample Name : GB072P1 recemic  
Sample ID : GYJ  
Data File Name : G125.lcd  
Method File Name : 10%IPA, 1ml-min, 60min.lcm  
Batch File Name :  
Report File Name : Default.lcr  
Description : IC column with guard column,10%IPA

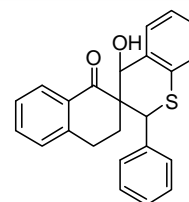

Recemic

Chromatogram  
GB072P1 recemic C:\Users\User\Desktop\LC data\Gao Yaojun\G125.lcd

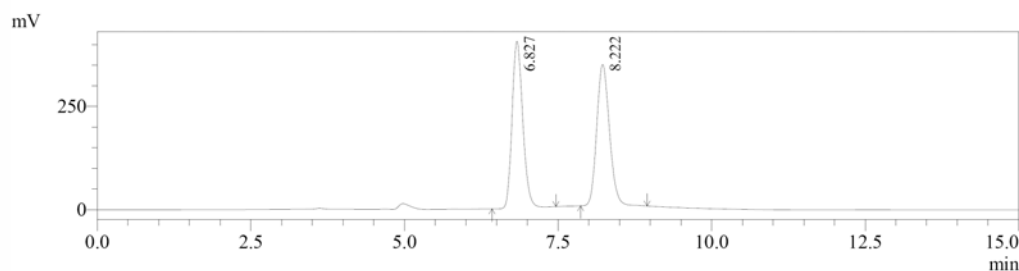

SPD-20A Ch2 254nm

| Peak# | Ret. Time | Area    | Height | Area %  | Height % |
|-------|-----------|---------|--------|---------|----------|
| 1     | 6.827     | 4861199 | 403598 | 49.522  | 54.102   |
| 2     | 8.222     | 4955041 | 342403 | 50.478  | 45.898   |
| Total |           | 9816240 | 746001 | 100.000 | 100.000  |

Enantiomeric enriched 8s

==== Shimadzu LCsolution Analysis Report ====

C:\Users\User\Desktop\LC data\Gao Yaojun\G168.lcd  
Acquired by : Admin  
Sample Name : GB104P1  
Sample ID : GYJ  
Data File Name : G168.lcd  
Method File Name : 10%IPA, 1ml-min, 40min.lcm  
Batch File Name :  
Report File Name : Default.lcr  
Description : IC column with guard column,10%IPA

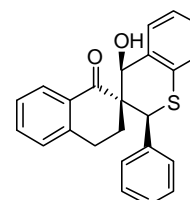

Chromatogram  
GB104P1 C:\Users\User\Desktop\LC data\Gao Yaojun\G168.lcd

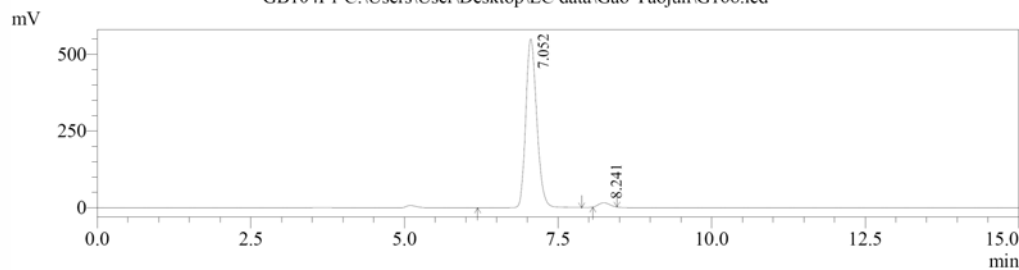

SPD-20A Ch1 254nm

| Peak# | Ret. Time | Area    | Height | Area %  | Height % |
|-------|-----------|---------|--------|---------|----------|
| 1     | 7.052     | 6903262 | 550548 | 97.600  | 97.537   |
| 2     | 8.241     | 169733  | 13904  | 2.400   | 2.463    |
| Total |           | 7072995 | 564452 | 100.000 | 100.000  |



Racemic 8t

==== Shimadzu LCsolution Analysis Report ====

C:\Users\User\Desktop\LC data\Gao Yaojun\G129.lcd  
Acquired by : Admin  
Sample Name : GB073P1 recemic  
Sample ID : GYJ  
Data File Name : G129.lcd  
Method File Name : 5%IPA, 1ml-min, 60min.lcm  
Batch File Name :  
Report File Name : Default.lcr  
Description : IC column with guard column, 5%IPA

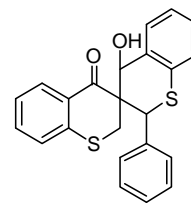

Recemic

Chromatogram  
GB073P1 recemic C:\Users\User\Desktop\LC data\Gao Yaojun\G129.lcd

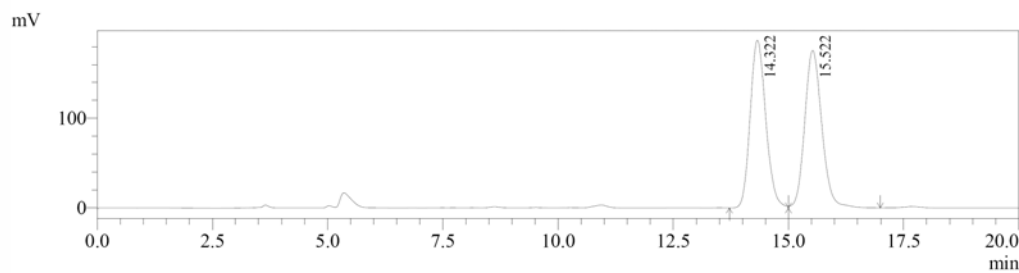

SPD-20A Ch2 254nm

| Peak# | Ret. Time | Area    | Height | Area %  | Height % |
|-------|-----------|---------|--------|---------|----------|
| 1     | 14.322    | 4425369 | 187294 | 49.270  | 51.568   |
| 2     | 15.522    | 4556462 | 175907 | 50.730  | 48.432   |
| Total |           | 8981830 | 363201 | 100.000 | 100.000  |

Enantiomeric enriched 8t

==== Shimadzu LCsolution Analysis Report ====

C:\Users\User\Desktop\LC data\Gao Yaojun\G171.lcd  
Acquired by : Admin  
Sample Name : GB105P1  
Sample ID : GYJ  
Data File Name : G171.lcd  
Method File Name : 5%IPA, 1ml-min, 60min.lcm  
Batch File Name :  
Report File Name : Default.lcr  
Description : IC column with guard column, 5%IPA

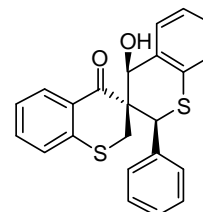

Chromatogram  
GB105P1 C:\Users\User\Desktop\LC data\Gao Yaojun\G171.lcd

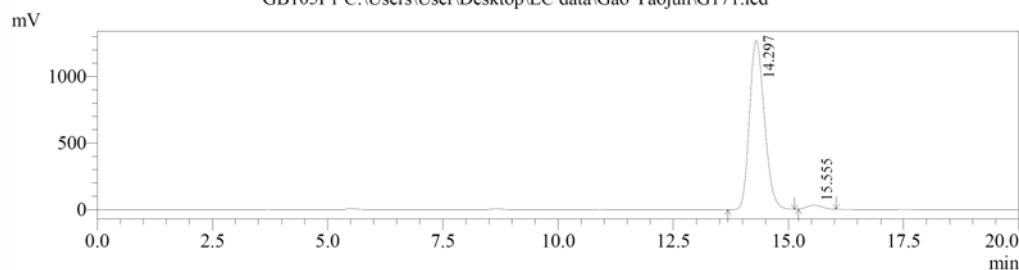

SPD-20A Ch1 254nm

| Peak# | Ret. Time | Area     | Height  | Area %  | Height % |
|-------|-----------|----------|---------|---------|----------|
| 1     | 14.297    | 28733699 | 1269317 | 97.769  | 97.728   |
| 2     | 15.555    | 655565   | 29510   | 2.231   | 2.272    |
| Total |           | 29389265 | 1298827 | 100.000 | 100.000  |

Racemic 8u

==== Shimadzu LCsolution Analysis Report ====

C:\Users\User\Desktop\LC data\Gao Yaojun\G146.lcd

Acquired by : Admin  
 Sample Name : GB095P1  
 Sample ID : GYJ  
 Data File Name : G146.lcd  
 Method File Name : 10%IPA, 1ml-min, 40min.lcm  
 Batch File Name :  
 Report File Name : Default.lcr  
 Description : IC column with guard column, 10%IPA

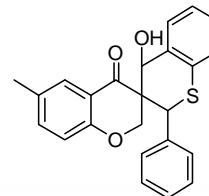

Racemic

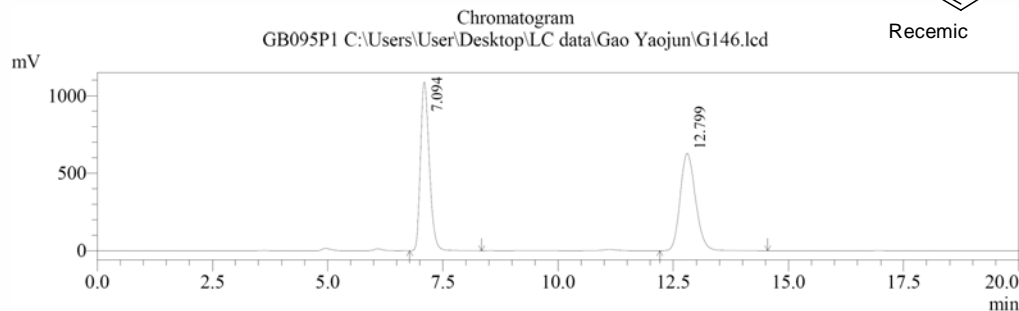

SPD-20A Ch1 254nm

| Peak# | Ret. Time | Area     | Height  | Area %  | Height % |
|-------|-----------|----------|---------|---------|----------|
| 1     | 7.094     | 14505685 | 1088819 | 49.920  | 63.390   |
| 2     | 12.799    | 14552406 | 628834  | 50.080  | 36.610   |
| Total |           | 29058090 | 1717653 | 100.000 | 100.000  |

Enantiomeric enriched 8u

==== Shimadzu LCsolution Analysis Report ====

C:\Users\User\Desktop\LC data\Gao Yaojun\G164.lcd

Acquired by : Admin  
 Sample Name : GB110P1  
 Sample ID : GYJ  
 Data File Name : G164.lcd  
 Method File Name : 10%IPA, 1ml-min, 40min.lcm  
 Batch File Name :  
 Report File Name : Default.lcr  
 Description : IC column with guard column, 10%IPA

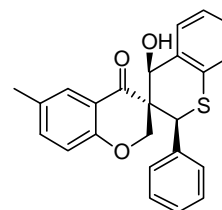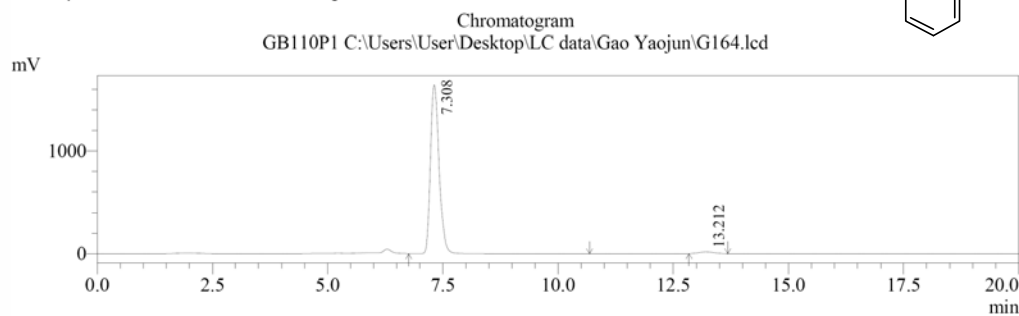

SPD-20A Ch1 254nm

| Peak# | Ret. Time | Area     | Height  | Area %  | Height % |
|-------|-----------|----------|---------|---------|----------|
| 1     | 7.308     | 21835017 | 1642769 | 98.276  | 98.959   |
| 2     | 13.212    | 382941   | 17287   | 1.724   | 1.041    |
| Total |           | 22217958 | 1660056 | 100.000 | 100.000  |

Racemic 8v

==== Shimadzu LCsolution Analysis Report ====

C:\Users\User\Desktop\LC data\Gao Yaojun\G191.lcd  
Acquired by : Admin  
Sample Name : GB124P1 racemic  
Sample ID : GYJ  
Data File Name : G191.lcd  
Method File Name : 10%IPA, 1ml-min, 40min.lcm  
Batch File Name :  
Report File Name : Default.lcr  
Description : IC column with guard column, 10%IPA

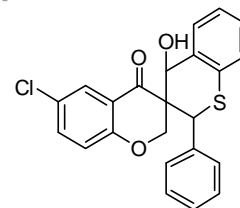

Racemic

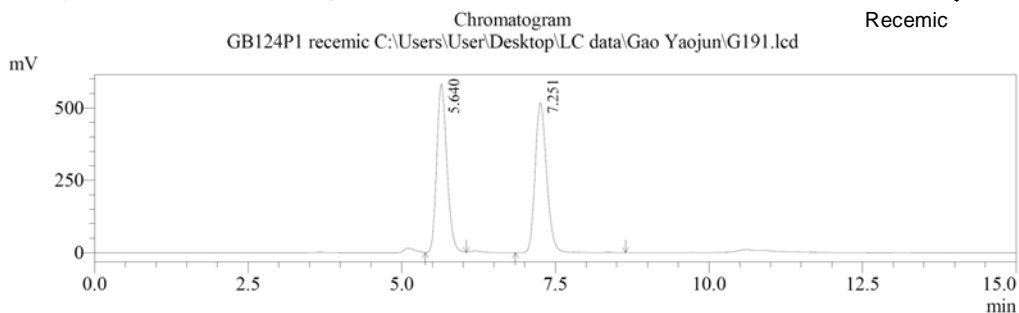

SPD-20A Ch1 254nm

| Peak# | Ret. Time | Area     | Height  | Area %  | Height % |
|-------|-----------|----------|---------|---------|----------|
| 1     | 5.640     | 6728007  | 583183  | 49.941  | 52.967   |
| 2     | 7.251     | 6743981  | 517853  | 50.059  | 47.033   |
| Total |           | 13471988 | 1101036 | 100.000 | 100.000  |

Enantiomeric enriched 8v

==== Shimadzu LCsolution Analysis Report ====

C:\Users\User\Desktop\LC data\Gao Yaojun\G210.lcd  
Acquired by : Admin  
Sample Name : GB135p1  
Sample ID : GYJ  
Data File Name : G210.lcd  
Method File Name : 10%IPA, 1ml-min, 40min.lcm  
Batch File Name :  
Report File Name : Default.lcr  
Description : IC column with guard column, 10%IPA

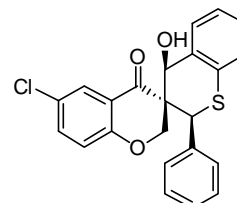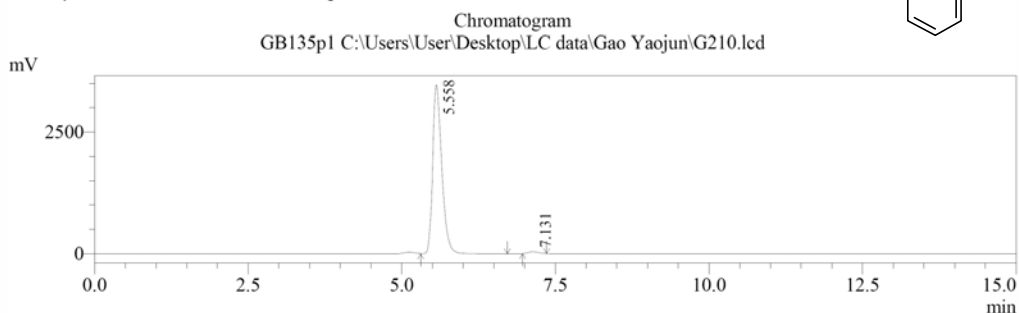

SPD-20A Ch1 254nm

| Peak# | Ret. Time | Area     | Height  | Area %  | Height % |
|-------|-----------|----------|---------|---------|----------|
| 1     | 5.558     | 35795841 | 3468158 | 98.811  | 98.926   |
| 2     | 7.131     | 430688   | 37660   | 1.189   | 1.074    |
| Total |           | 36226528 | 3505818 | 100.000 | 100.000  |

Racemic 8w

==== Shimadzu LCsolution Analysis Report ====

C:\Users\User\Desktop\LC data\Gao Yaojun\G150.lcd  
Acquired by : Admin  
Sample Name : GB099P1  
Sample ID : GYJ  
Data File Name : G150.lcd  
Method File Name : 10%IPA, 1ml-min, 40min.lcm  
Batch File Name :  
Report File Name : Default.lcr  
Description : IC column with guard column,10%IPA

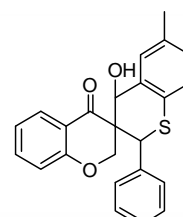

Racemic

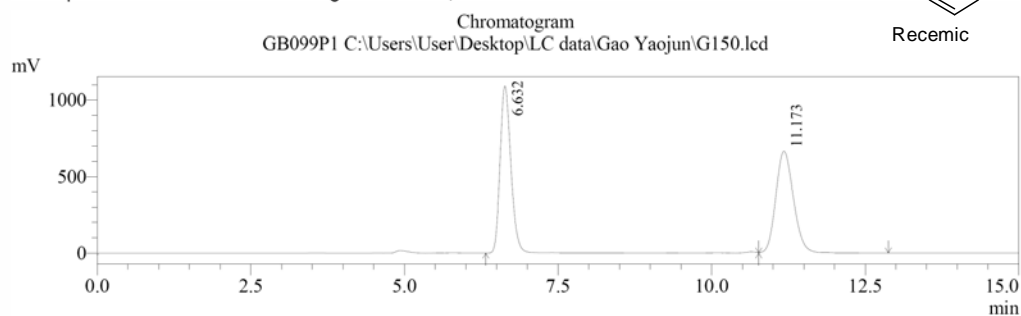

SPD-20A Ch1 254nm

| Peak# | Ret. Time | Area     | Height  | Area %  | Height % |
|-------|-----------|----------|---------|---------|----------|
| 1     | 6.632     | 13555178 | 1092283 | 50.389  | 62.128   |
| 2     | 11.173    | 13345963 | 665834  | 49.611  | 37.872   |
| Total |           | 26901141 | 1758117 | 100.000 | 100.000  |

Enantiomeric enriched 8w

==== Shimadzu LCsolution Analysis Report ====

C:\Users\User\Desktop\LC data\Gao Yaojun\G165.lcd  
Acquired by : Admin  
Sample Name : GB111P1  
Sample ID : GYJ  
Data File Name : G165.lcd  
Method File Name : 10%IPA, 1ml-min, 40min.lcm  
Batch File Name :  
Report File Name : Default.lcr  
Description : IC column with guard column,10%IPA

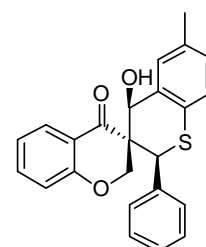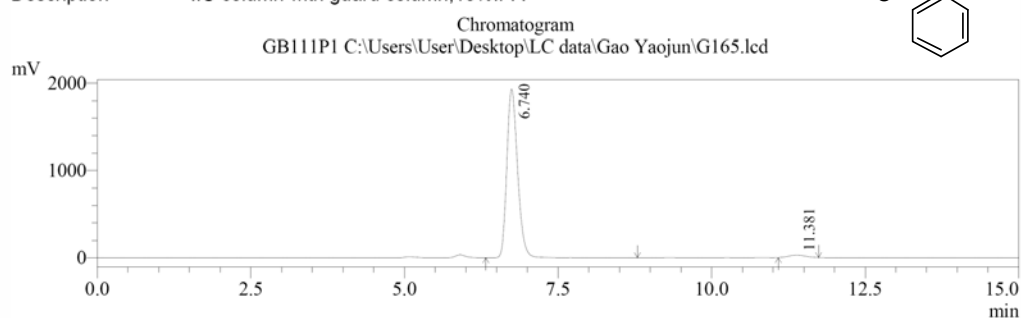

SPD-20A Ch1 254nm

| Peak# | Ret. Time | Area     | Height  | Area %  | Height % |
|-------|-----------|----------|---------|---------|----------|
| 1     | 6.740     | 23571464 | 1935039 | 97.805  | 98.547   |
| 2     | 11.381    | 528952   | 28522   | 2.195   | 1.453    |
| Total |           | 24100416 | 1963561 | 100.000 | 100.000  |

Racemic 8x

==== Shimadzu LCsolution Analysis Report ====

C:\Users\User\Desktop\LC data\Gao Yaojun\G155.lcd

Acquired by : Admin  
Sample Name : GB101P1  
Sample ID : GYJ  
Data File Name : G155.lcd  
Method File Name : 10%IPA, 1ml-min, 40min.lcm  
Batch File Name :  
Report File Name : Default.lcr  
Description : IC column with guard column,10%IPA

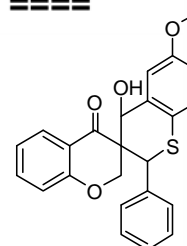

Racemic

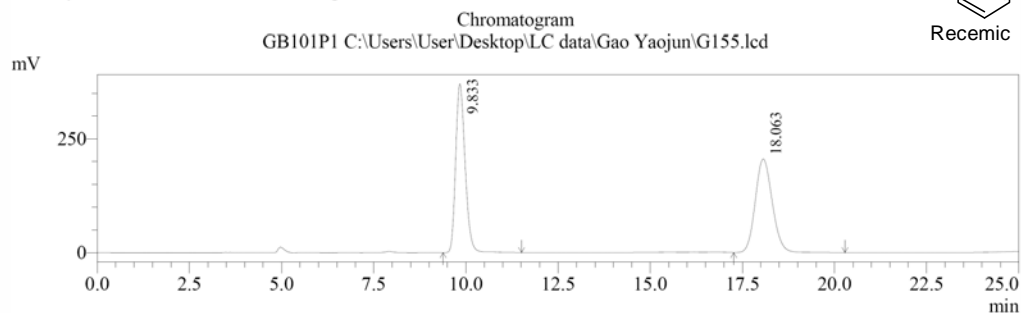

PeakTable

SPD-20A Ch1 254nm

| Peak# | Ret. Time | Area     | Height | Area %  | Height % |
|-------|-----------|----------|--------|---------|----------|
| 1     | 9.833     | 6617261  | 370747 | 50.089  | 64.308   |
| 2     | 18.063    | 6593621  | 205770 | 49.911  | 35.692   |
| Total |           | 13210882 | 576516 | 100.000 | 100.000  |

Enantiomeric enriched 8x

==== Shimadzu LCsolution Analysis Report ====

C:\Users\User\Desktop\LC data\Gao Yaojun\G167.lcd

Acquired by : Admin  
Sample Name : GB113P1  
Sample ID : GYJ  
Data File Name : G167.lcd  
Method File Name : 10%IPA, 1ml-min, 40min.lcm  
Batch File Name :  
Report File Name : Default.lcr  
Description : IC column with guard column,10%IPA

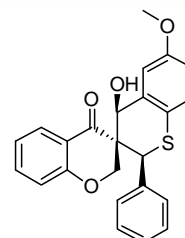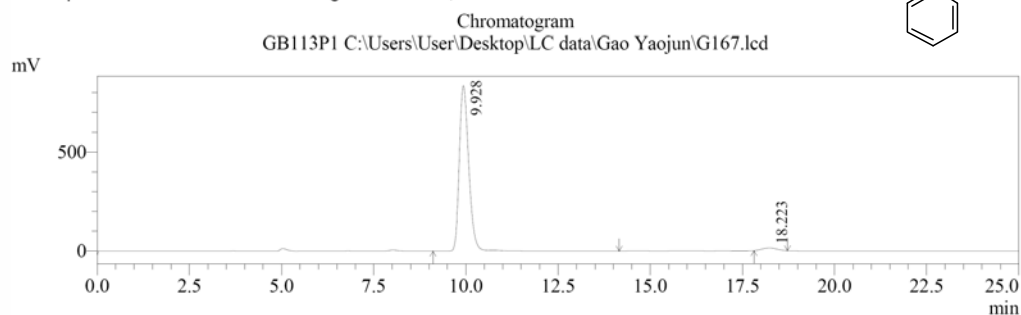

PeakTable

SPD-20A Ch1 254nm

| Peak# | Ret. Time | Area     | Height | Area %  | Height % |
|-------|-----------|----------|--------|---------|----------|
| 1     | 9.928     | 15019469 | 835523 | 97.514  | 98.376   |
| 2     | 18.223    | 382969   | 13792  | 2.486   | 1.624    |
| Total |           | 15402438 | 849316 | 100.000 | 100.000  |

Racemic 8y

==== Shimadzu LCsolution Analysis Report ====

C:\Users\User\Desktop\LC data\Gao Yaojun\G154.lcd  
 Acquired by : Admin  
 Sample Name : GB100P1  
 Sample ID : GYJ  
 Data File Name : G154.lcd  
 Method File Name : 10%IPA, 1ml-min, 40min.lcm  
 Batch File Name :  
 Report File Name : Default.lcr  
 Description : IC column with guard column, 10%IPA

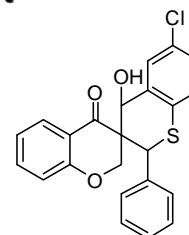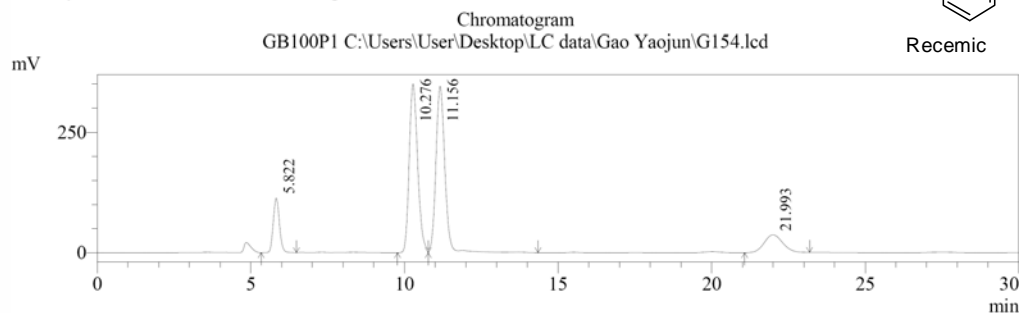

PeakTable

| Peak# | Ret. Time | Area     | Height | Area %  | Height % |
|-------|-----------|----------|--------|---------|----------|
| 1     | 5.822     | 1585649  | 113212 | 9.385   | 13.389   |
| 2     | 10.276    | 6713879  | 350116 | 39.738  | 41.407   |
| 3     | 11.156    | 7054892  | 345344 | 41.756  | 40.843   |
| 4     | 21.993    | 1541037  | 36866  | 9.121   | 4.360    |
| Total |           | 16895457 | 845538 | 100.000 | 100.000  |

Enantiomeric enriched 8y

==== Shimadzu LCsolution Analysis Report ====

C:\Users\User\Desktop\LC data\Gao Yaojun\G166.lcd  
 Acquired by : Admin  
 Sample Name : GB112P1  
 Sample ID : GYJ  
 Data File Name : G166.lcd  
 Method File Name : 10%IPA, 1ml-min, 40min.lcm  
 Batch File Name :  
 Report File Name : Default.lcr  
 Description : IC column with guard column, 10%IPA

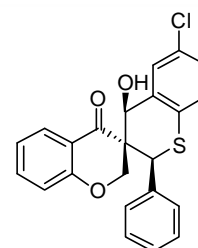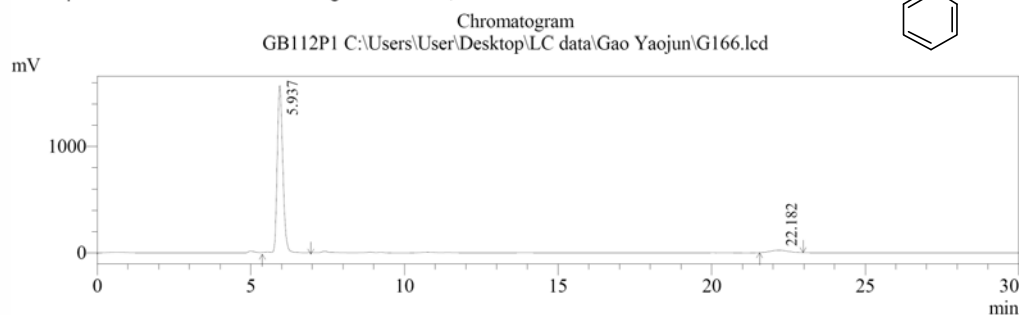

PeakTable

| Peak# | Ret. Time | Area     | Height  | Area %  | Height % |
|-------|-----------|----------|---------|---------|----------|
| 1     | 5.937     | 21158716 | 1587342 | 96.036  | 98.612   |
| 2     | 22.182    | 873298   | 22344   | 3.964   | 1.388    |
| Total |           | 22032014 | 1609686 | 100.000 | 100.000  |

### Racemic 9

## ==== Shimadzu LCsolution Analysis Report ====

C:\Users\User\Desktop\LC data\Gao Yaojun\G288.lcd

Acquired by : Admin  
Sample Name : gc070  
Sample ID : gjj  
Data File Name : G288.lcd  
Method File Name : 10%IPA, 1ml-min, 60min.lcm  
Batch File Name :  
Report File Name : Default.lcr  
Description : IC column with guard column,10%IPA

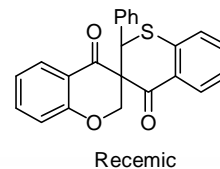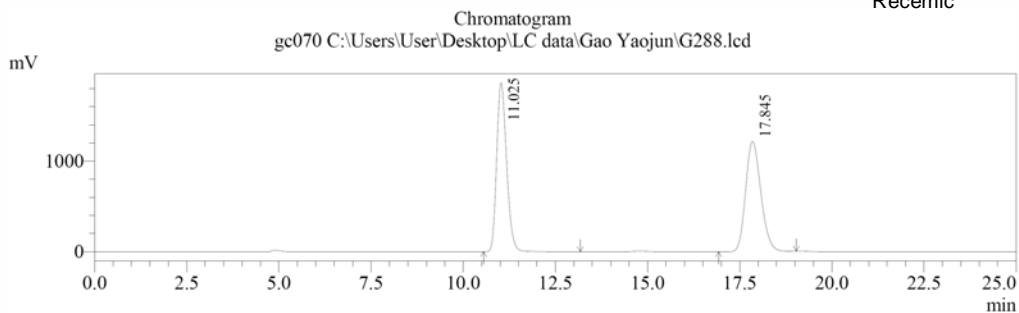

PeakTable

| Peak# | Ret. Time | Area     | Height  | Area %  | Height % |
|-------|-----------|----------|---------|---------|----------|
| 1     | 11.025    | 34847416 | 1864119 | 50.031  | 60.496   |
| 2     | 17.845    | 34803705 | 1217258 | 49.969  | 39.504   |
| Total |           | 69651121 | 3081377 | 100.000 | 100.000  |

### Enantiomeric enriched 9

## ==== Shimadzu LCsolution Analysis Report ====

C:\Users\User\Desktop\LC data\Gao Yaojun\G290.lcd

Acquired by : Admin  
Sample Name : GC072  
Sample ID : gjj  
Data File Name : G290.lcd  
Method File Name : 10%IPA, 1ml-min, 60min.lcm  
Batch File Name :  
Report File Name : Default.lcr  
Description : IC column with guard column,10%IPA

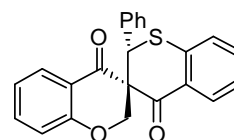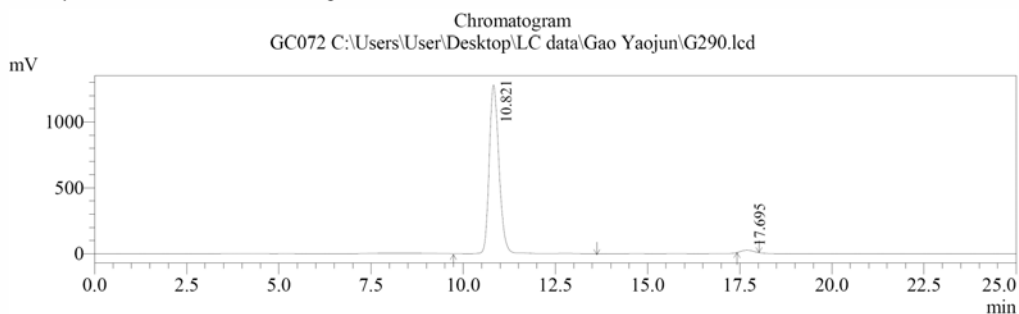

PeakTable

| Peak# | Ret. Time | Area     | Height  | Area %  | Height % |
|-------|-----------|----------|---------|---------|----------|
| 1     | 10.821    | 25242449 | 1286772 | 98.507  | 98.594   |
| 2     | 17.695    | 382594   | 18349   | 1.493   | 1.406    |
| Total |           | 25625043 | 1305121 | 100.000 | 100.000  |

Racemic 11

==== Shimadzu LCsolution Analysis Report ====

C:\Users\User\Desktop\LC data\Gao Yaojun\G063.lcd

Acquired by : Admin  
Sample Name : GB025 P2  
Sample ID : GYJ  
Data File Name : G063.lcd  
Method File Name : 10%IPA, 1ml-min, 40min.lcm  
Batch File Name :  
Report File Name : Default.lcr  
Description : IC column with guard column

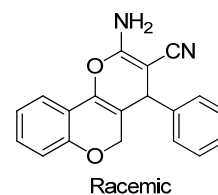

Chromatogram  
GB025 P2 C:\Users\User\Desktop\LC data\Gao Yaojun\G063.lcd

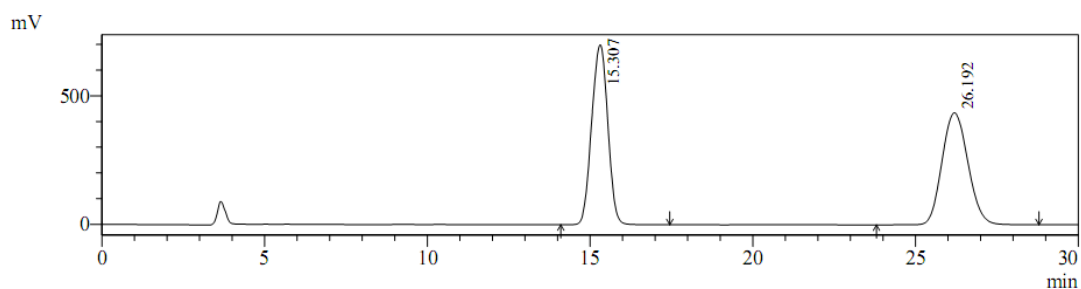

PeakTable

SPD-20A Ch2 254nm

| Peak# | Ret. Time | Area     | Height  | Area %  | Height % |
|-------|-----------|----------|---------|---------|----------|
| 1     | 15.307    | 24124559 | 700094  | 49.993  | 61.630   |
| 2     | 26.192    | 24131021 | 435860  | 50.007  | 38.370   |
| Total |           | 48255580 | 1135954 | 100.000 | 100.000  |

Enantiomeric enriched 11

==== Shimadzu LCsolution Analysis Report ====

C:\Users\User\Desktop\LC data\Ren Qiao\rq052.lcd

Acquired by : Admin  
Sample Name : R154-p2  
Sample ID : rq  
Data File Name : rq052.lcd  
Method File Name : 10%IPA, 1ml-min, 40min.lcm  
Batch File Name :  
Report File Name : Default.lcr  
Description : IC column with guard column,10%IPA

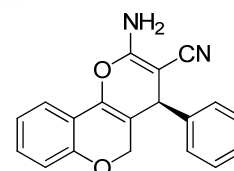

Chromatogram  
R154-p2 C:\Users\User\Desktop\LC data\Ren Qiao\rq052.lcd

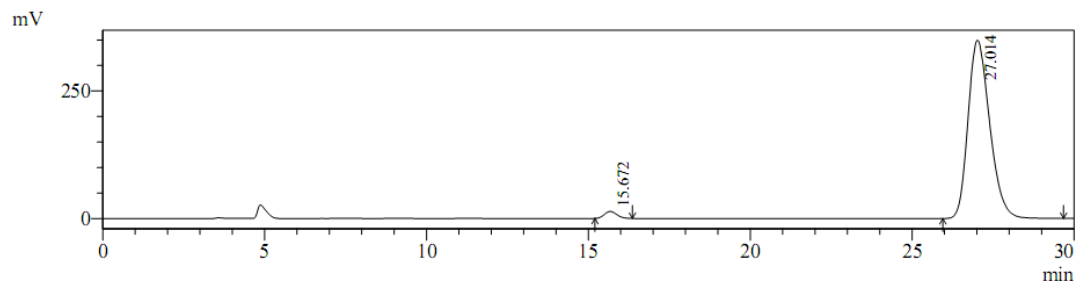

PeakTable

SPD-20A Ch1 254nm

| Peak# | Ret. Time | Area     | Height | Area %  | Height % |
|-------|-----------|----------|--------|---------|----------|
| 1     | 15.672    | 370035   | 13809  | 2.222   | 3.800    |
| 2     | 27.014    | 16279568 | 349530 | 97.778  | 96.200   |
| Total |           | 16649603 | 363339 | 100.000 | 100.000  |
